# Supplementary material for: Global, regional, and national burden of pulmonary arterial hypertension, 1990–2021, with projections to 2045: a systematic analysis for the Global Burden of Disease Study 2021
Source: Research Square preprint supplement (doi:10.21203/rs.3.rs-6936502/v1), 2025-07-24
Supplement: Supplementary file 1 [file 98394315a3578208e19e3e37.docx]

**Table S3. EAPC of ASIR, ASMR, and ASDR for PAH in 204 countries and territories from 1990 to 2021**

|  | **EAPC of ASIR (95% CI)** | | | **EAPC of ASMR (95% CI)** | | | **EAPC of ASDR (95% CI)** | | |
| --- | --- | --- | --- | --- | --- | --- | --- | --- | --- |
| **Location** | **Both** | **Male** | **Female** | **Both** | **Male** | **Female** | **Both** | **Male** | **Female** |
| Afghanistan | -0.12 (-0.25, 0.01) | -0.11 (-0.26, 0.05) | -0.14 (-0.25, 0.02) | 2.38 (1.97, 2.80) | 2.20 (1.74, 2.67) | 2.65 (2.30, 3.01) | 1.96 (1.55, 2.37) | 1.78 (1.33, 2.24) | 2.23 (1.89, 2.58) |
| Albania | 0.51 (0.38, 0.65) | 0.57 (0.42, 0.72) | 0.47 (0.34, 0.59) | -1.78 (-2.01, 1.55) | -3.04 (-3.31, 2.76) | -1.02 (-1.23, 0.81) | -1.96 (-2.13, 1.78) | -3.06 (-3.25, 2.86) | -1.23 (-1.41, 1.05) |
| Algeria | -0.24 (-0.35, 0.12) | -0.22 (-0.36, 0.09) | -0.23 (-0.33, 0.13) | 2.02 (1.53, 2.51) | 1.11 (0.75, 1.48) | 2.96 (2.33, 3.59) | 0.49 (0.15, 0.83) | -0.21 (-0.52, 0.10) | 1.24 (0.86, 1.62) |
| American Samoa | -0.05 (-0.14, 0.04) | -0.07 (-0.17, 0.02) | -0.04 (-0.13, 0.04) | -0.85 (-0.89, 0.82) | -0.86 (-0.93, 0.78) | -0.77 (-0.81, 0.73) | -0.59 (-0.62, 0.56) | -0.97 (-1.01, 0.93) | -0.34 (-0.38, 0.29) |
| Andorra | -0.38 (-0.42, 0.34) | -0.38 (-0.42, 0.33) | -0.41 (-0.45, 0.37) | -2.42 (-2.62, 2.23) | -2.99 (-3.20, 2.78) | -2.11 (-2.32, 1.89) | -2.87 (-3.00, 2.74) | -3.40 (-3.53, 3.28) | -2.58 (-2.73, 2.43) |
| Angola | 0.14 (0.06, 0.21) | 0.13 (0.05, 0.21) | 0.10 (0.03, 0.18) | -1.13 (-1.19, 1.07) | -1.66 (-1.73, 1.59) | -0.23 (-0.32, 0.13) | -1.55 (-1.66, 1.44) | -2.16 (-2.28, 2.05) | -0.51 (-0.65, 0.36) |
| Antigua and Barbuda | 0.18 (0.09, 0.26) | 0.15 (0.06, 0.23) | 0.22 (0.13, 0.31) | -4.25 (-4.75, 3.76) | -4.71 (-5.20, 4.21) | -3.60 (-4.06, 3.14) | -4.36 (-4.84, 3.87) | -5.03 (-5.59, 4.46) | -3.47 (-3.85, 3.09) |
| Argentina | -0.09 (-0.13, 0.05) | -0.10 (-0.14, 0.06) | -0.08 (-0.12, 0.05) | -2.20 (-2.37, 2.03) | -2.90 (-3.07, 2.73) | -1.80 (-1.98, 1.61) | -3.16 (-3.31, 3.02) | -4.02 (-4.18, 3.85) | -2.60 (-2.74, 2.45) |
| Armenia | 0.20 (0.16, 0.23) | 0.26 (0.22, 0.30) | 0.16 (0.13, 0.19) | -4.83 (-5.70, 3.95) | -5.04 (-5.90, 4.17) | -4.60 (-5.50, 3.69) | -5.26 (-6.07, 4.45) | -5.51 (-6.34, 4.68) | -4.86 (-5.67, 4.05) |
| Australia | 0.18 (0.14, 0.21) | 0.16 (0.13, 0.20) | 0.17 (0.14, 0.21) | -2.20 (-2.58, 1.82) | -2.06 (-2.40, 1.72) | -2.21 (-2.62, 1.79) | -2.48 (-2.90, 2.07) | -2.56 (-2.93, 2.19) | -2.42 (-2.87, 1.97) |
| Austria | -0.38 (-0.47, 0.29) | -0.38 (-0.48, 0.28) | -0.41 (-0.49, 0.32) | -0.81 (-1.50, 0.12) | -1.73 (-2.34, 1.11) | -0.17 (-0.92, 0.58) | -1.28 (-1.92, 0.64) | -2.21 (-2.77, 1.64) | -0.49 (-1.21, 0.24) |
| Azerbaijan | -0.64 (-0.84, 0.44) | -0.61 (-0.81, 0.40) | -0.63 (-0.82, 0.43) | -1.02 (-1.16, 0.89) | -1.43 (-1.58, 1.27) | -0.73 (-0.87, 0.60) | -1.37 (-1.54, 1.21) | -1.81 (-2.01, 1.62) | -0.89 (-1.04, 0.73) |
| Bahamas | 0.40 (0.22, 0.59) | 0.37 (0.18, 0.56) | 0.43 (0.25, 0.61) | -4.03 (-4.61, 3.45) | -4.69 (-5.30, 4.07) | -3.60 (-4.17, 3.03) | -4.43 (-4.98, 3.88) | -4.99 (-5.56, 4.43) | -4.02 (-4.57, 3.46) |
| Bahrain | -0.07 (-0.20, 0.06) | -0.02 (-0.17, 0.12) | -0.06 (-0.17, 0.05) | -0.04 (-0.66, 0.60) | 0.25 (-0.45, 0.95) | -0.09 (-0.68, 0.51) | -0.50 (-1.19, 0.18) | -0.31 (-1.09, 0.49) | -0.55 (-1.17, 0.08) |
| Bangladesh | 0.14 (-0.15, 0.44) | 0.12 (-0.18, 0.42) | 0.10 (-0.20, 0.40) | -0.99 (-1.22, 0.77) | -1.43 (-1.76, 1.10) | -0.58 (-0.74, 0.42) | -1.21 (-1.35, 1.07) | -1.96 (-2.18, 1.75) | -0.61 (-0.73, 0.49) |
| Barbados | 0.19 (0.10, 0.27) | 0.16 (0.08, 0.24) | 0.22 (0.13, 0.32) | -4.49 (-5.05, 3.92) | -4.98 (-5.69, 4.27) | -4.17 (-4.66, 3.67) | -4.71 (-5.24, 4.18) | -5.15 (-5.81, 4.50) | -4.43 (-4.90, 3.97) |
| Belarus | 0.40 (0.12, 0.68) | 0.49 (0.18, 0.81) | 0.34 (0.09, 0.60) | -0.37 (-0.55, 0.19) | -0.04 (-0.27, 0.19) | -0.60 (-0.72, 0.47) | -1.22 (-1.38, 1.05) | -1.03 (-1.27, 0.79) | -1.33 (-1.45, 1.22) |
| Belgium | -0.18 (-0.27, 0.08) | -0.16 (-0.27, 0.05) | -0.21 (-0.30, 0.13) | -1.67 (-1.99, 1.35) | -2.11 (-2.41, 1.81) | -1.41 (-1.73, 1.09) | -1.94 (-2.23, 1.66) | -2.43 (-2.69, 2.18) | -1.66 (-1.97, 1.35) |
| Belize | 0.07 (-0.09, 0.23) | 0.01 (-0.15, 0.17) | 0.12 (-0.04, 0.28) | -4.69 (-5.33, 4.05) | -5.27 (-6.00, 4.54) | -4.38 (-5.00, 3.77) | -5.38 (-5.92, 4.84) | -6.09 (-6.67, 5.51) | -4.96 (-5.51, 4.41) |
| Benin | -1.32 (-1.61, 1.02) | -1.33 (-1.62, 1.03) | -1.30 (-1.60, 1.01) | -0.96 (-1.06, 0.86) | -1.02 (-1.14, 0.91) | -0.59 (-0.67, 0.51) | -0.87 (-1.00, 0.74) | -1.04 (-1.18, 0.90) | -0.43 (-0.54, 0.32) |
| Bermuda | 0.18 (0.10, 0.26) | 0.15 (0.07, 0.24) | 0.21 (0.13, 0.30) | -4.71 (-5.25, 4.16) | -4.49 (-5.05, 3.94) | -4.99 (-5.55, 4.43) | -5.13 (-5.60, 4.65) | -4.96 (-5.44, 4.48) | -5.32 (-5.81, 4.82) |
| Bhutan | 0.40 (0.36, 0.44) | 0.43 (0.39, 0.48) | 0.37 (0.34, 0.41) | -0.89 (-0.94, 0.84) | -1.54 (-1.60, 1.48) | -0.28 (-0.33, 0.22) | -1.64 (-1.79, 1.50) | -2.43 (-2.59, 2.26) | -0.78 (-0.93, 0.63) |
| Bolivia (Plurinational State of) | 0.16 (0.07, 0.24) | 0.10 (0.02, 0.19) | 0.21 (0.12, 0.30) | -1.83 (-1.87, 1.79) | -2.26 (-2.32, 2.20) | -1.49 (-1.52, 1.46) | -2.52 (-2.59, 2.45) | -2.97 (-3.06, 2.88) | -2.10 (-2.16, 2.04) |
| Bosnia and Herzegovina | 0.44 (0.28, 0.59) | 0.50 (0.33, 0.67) | 0.39 (0.24, 0.54) | -1.01 (-1.15, 0.88) | -1.45 (-1.64, 1.26) | -0.68 (-0.79, 0.58) | -1.22 (-1.37, 1.08) | -1.82 (-2.02, 1.61) | -0.75 (-0.87, 0.63) |
| Botswana | 0.18 (0.13, 0.24) | 0.19 (0.14, 0.24) | 0.19 (0.13, 0.25) | -1.71 (-1.81, 1.61) | -2.49 (-2.68, 2.29) | -0.36 (-0.73, 0.01) | -1.51 (-1.62, 1.40) | -2.38 (-2.54, 2.23) | -0.12 (-0.54, 0.29) |
| Brazil | -0.07 (-0.19, 0.05) | -0.13 (-0.25, 0.01) | -0.03 (-0.16, 0.10) | -0.56 (-1.09, 0.03) | -0.67 (-1.21, 0.12) | -0.54 (-1.06, 0.01) | -1.13 (-1.66, 0.59) | -1.36 (-1.93, 0.78) | -0.97 (-1.48, 0.45) |
| Brunei Darussalam | 0.01 (-0.04, 0.06) | 0.03 (-0.02, 0.08) | 0.01 (-0.04, 0.06) | -1.48 (-1.61, 1.35) | -2.10 (-2.29, 1.92) | -1.38 (-1.52, 1.25) | -1.59 (-1.69, 1.49) | -2.23 (-2.38, 2.09) | -1.40 (-1.50, 1.30) |
| Bulgaria | 0.39 (0.20, 0.58) | 0.42 (0.22, 0.62) | 0.35 (0.18, 0.52) | -0.96 (-1.59, 0.32) | -2.10 (-2.83, 1.37) | -0.13 (-0.69, 0.43) | -1.04 (-1.61, 0.45) | -2.20 (-2.87, 1.52) | -0.20 (-0.71, 0.32) |
| Burkina Faso | -1.99 (-2.30, 1.68) | -2.00 (-2.31, 1.70) | -1.98 (-2.28, 1.67) | -0.32 (-0.41, 0.22) | -0.56 (-0.64, 0.48) | 0.28 (0.13, 0.44) | -0.44 (-0.54, 0.34) | -0.67 (-0.77, 0.57) | 0.10 (-0.01, 0.22) |
| Burundi | -0.26 (-0.44, 0.08) | -0.19 (-0.37, 0.00) | -0.26 (-0.43, 0.07) | -2.01 (-2.12, 1.89) | -2.51 (-2.62, 2.40) | -1.35 (-1.48, 1.21) | -2.38 (-2.47, 2.29) | -2.91 (-3.01, 2.82) | -1.63 (-1.73, 1.52) |
| Cabo Verde | -0.84 (-0.94, 0.73) | -0.84 (-0.95, 0.73) | -0.80 (-0.91, 0.70) | -1.82 (-1.96, 1.68) | -1.98 (-2.26, 1.71) | -1.54 (-1.61, 1.47) | -2.43 (-2.55, 2.32) | -2.83 (-3.00, 2.65) | -1.88 (-2.02, 1.74) |
| Cambodia | -0.08 (-0.17, 0.00) | -0.01 (-0.08, 0.07) | -0.13 (-0.22, 0.04) | -0.85 (-0.89, 0.80) | -1.21 (-1.26, 1.16) | -0.58 (-0.62, 0.54) | -1.10 (-1.16, 1.04) | -1.56 (-1.64, 1.47) | -0.70 (-0.75, 0.65) |
| Cameroon | -1.32 (-1.47, 1.16) | -1.33 (-1.48, 1.17) | -1.30 (-1.46, 1.14) | -1.11 (-1.29, 0.93) | -1.16 (-1.46, 0.86) | -0.96 (-1.01, 0.90) | -0.74 (-0.97, 0.50) | -0.85 (-1.19, 0.50) | -0.54 (-0.62, 0.46) |
| Canada | 0.62 (0.44, 0.79) | 0.65 (0.46, 0.83) | 0.58 (0.41, 0.75) | -4.03 (-4.84, 3.21) | -4.67 (-5.45, 3.88) | -3.69 (-4.54, 2.84) | -4.24 (-4.97, 3.51) | -4.74 (-5.47, 4.01) | -3.93 (-4.68, 3.18) |
| Central African Republic | 0.02 (-0.03, 0.06) | 0.02 (-0.02, 0.07) | 0.01 (-0.04, 0.06) | -0.62 (-0.66, 0.59) | -0.86 (-0.89, 0.83) | -0.15 (-0.21, 0.08) | -0.73 (-0.78, 0.69) | -0.99 (-1.02, 0.95) | -0.23 (-0.32, 0.14) |
| Chad | -0.96 (-1.05, 0.86) | -0.94 (-1.04, 0.84) | -0.91 (-1.00, 0.82) | -0.17 (-0.32, 0.01) | -0.34 (-0.55, 0.13) | -0.05 (-0.12, 0.03) | -0.02 (-0.17, 0.14) | -0.19 (-0.38, 0.00) | 0.21 (0.12, 0.30) |
| Chile | 0.14 (0.03, 0.24) | 0.15 (0.03, 0.27) | 0.12 (0.03, 0.22) | -1.49 (-1.91, 1.07) | -2.00 (-2.43, 1.57) | -1.26 (-1.68, 0.84) | -1.84 (-2.21, 1.46) | -2.49 (-2.88, 2.09) | -1.47 (-1.84, 1.10) |
| China | -0.12 (-0.17, 0.08) | -0.03 (-0.09, 0.02) | -0.21 (-0.25, 0.17) | -0.61 (-0.98, 0.23) | -0.37 (-0.83, 0.10) | -0.87 (-1.16, 0.58) | -1.38 (-1.73, 1.03) | -1.17 (-1.60, 0.74) | -1.56 (-1.84, 1.28) |
| Colombia | -0.12 (-0.26, 0.01) | -0.20 (-0.33, 0.07) | -0.08 (-0.22, 0.05) | -1.73 (-2.13, 1.32) | -2.30 (-2.79, 1.82) | -1.38 (-1.73, 1.03) | -1.89 (-2.27, 1.51) | -2.59 (-3.07, 2.10) | -1.38 (-1.69, 1.07) |
| Comoros | 0.54 (0.38, 0.70) | 0.59 (0.41, 0.76) | 0.51 (0.35, 0.66) | -2.09 (-2.35, 1.83) | -2.61 (-2.88, 2.34) | -1.34 (-1.59, 1.09) | -2.48 (-2.78, 2.18) | -3.12 (-3.39, 2.84) | -1.59 (-1.92, 1.26) |
| Congo | -0.01 (-0.10, 0.08) | 0.03 (-0.05, 0.12) | 0.00 (-0.10, 0.10) | -1.40 (-1.48, 1.32) | -2.28 (-2.38, 2.19) | -0.42 (-0.51, 0.33) | -1.72 (-1.84, 1.60) | -2.63 (-2.77, 2.50) | -0.59 (-0.72, 0.46) |
| Cook Islands | 0.00 (-0.08, 0.09) | -0.04 (-0.13, 0.05) | 0.00 (-0.08, 0.09) | -2.40 (-2.52, 2.28) | -2.88 (-2.96, 2.80) | -2.23 (-2.38, 2.08) | -2.60 (-2.80, 2.39) | -3.16 (-3.32, 3.00) | -2.42 (-2.66, 2.17) |
| Costa Rica | -0.36 (-0.49, 0.23) | -0.45 (-0.58, 0.32) | -0.31 (-0.44, 0.18) | -5.69 (-6.33, 5.04) | -5.79 (-6.46, 5.11) | -5.62 (-6.25, 4.98) | -5.12 (-5.67, 4.56) | -5.11 (-5.73, 4.50) | -5.18 (-5.75, 4.61) |
| Coted'Ivoire | -1.86 (-2.07, 1.65) | -1.88 (-2.09, 1.67) | -1.84 (-2.05, 1.63) | -0.90 (-1.01, 0.80) | -1.23 (-1.39, 1.07) | -0.12 (-0.22, 0.01) | -0.70 (-0.83, 0.56) | -1.05 (-1.23, 0.88) | 0.14 (0.00, 0.27) |
| Croatia | 0.39 (0.28, 0.51) | 0.46 (0.33, 0.59) | 0.35 (0.25, 0.46) | -2.05 (-2.79, 1.30) | -3.58 (-4.42, 2.73) | -1.12 (-1.78, 0.46) | -2.22 (-2.86, 1.57) | -3.47 (-4.22, 2.72) | -1.35 (-1.91, 0.79) |
| Cuba | 0.22 (0.13, 0.30) | 0.17 (0.09, 0.25) | 0.25 (0.16, 0.34) | -3.53 (-4.12, 2.94) | -4.13 (-4.79, 3.46) | -3.15 (-3.71, 2.59) | -3.88 (-4.44, 3.32) | -4.62 (-5.23, 4.00) | -3.33 (-3.87, 2.79) |
| Cyprus | -0.84 (-1.02, 0.67) | -0.88 (-1.07, 0.69) | -0.83 (-1.00, 0.67) | -3.20 (-3.33, 3.08) | -4.20 (-4.35, 4.05) | -2.66 (-2.83, 2.50) | -3.64 (-3.78, 3.51) | -4.40 (-4.49, 4.31) | -3.17 (-3.36, 2.98) |
| Czechia | 0.40 (0.31, 0.49) | 0.44 (0.33, 0.54) | 0.38 (0.29, 0.47) | 0.56 (0.30, 0.81) | -0.64 (-0.97, 0.31) | 1.56 (1.35, 1.77) | -0.05 (-0.31, 0.20) | -1.14 (-1.47, 0.82) | 0.98 (0.78, 1.18) |
| Democratic People's Republic of Korea | 0.02 (-0.02, 0.06) | 0.09 (0.05, 0.12) | -0.01 (-0.05, 0.03) | 0.34 (0.15, 0.52) | -0.01 (-0.17, 0.16) | 0.46 (0.28, 0.65) | 0.06 (-0.11, 0.23) | -0.16 (-0.35, 0.03) | 0.20 (0.04, 0.36) |
| Democratic Republic of the Congo | 0.37 (0.12, 0.63) | 0.40 (0.15, 0.66) | 0.35 (0.10, 0.61) | -0.45 (-0.53, 0.37) | -0.88 (-1.01, 0.75) | 0.31 (0.22, 0.39) | -0.99 (-1.10, 0.88) | -1.46 (-1.62, 1.30) | -0.23 (-0.31, 0.15) |
| Denmark | -0.93 (-1.03, 0.82) | -0.93 (-1.05, 0.82) | -0.94 (-1.03, 0.84) | -0.90 (-1.53, 0.26) | -1.38 (-1.94, 0.82) | -0.49 (-1.19, 0.21) | -1.83 (-2.39, 1.27) | -2.41 (-2.93, 1.89) | -1.23 (-1.85, 0.61) |
| Djibouti | 0.01 (-0.15, 0.17) | 0.05 (-0.12, 0.22) | 0.01 (-0.15, 0.16) | -1.41 (-1.50, 1.31) | -1.73 (-1.82, 1.63) | -0.96 (-1.05, 0.87) | -1.77 (-1.94, 1.59) | -2.15 (-2.32, 1.97) | -1.14 (-1.31, 0.97) |
| Dominica | -0.17 (-0.29, 0.05) | -0.19 (-0.31, 0.08) | -0.09 (-0.22, 0.03) | -2.72 (-3.00, 2.44) | -3.53 (-3.85, 3.21) | -2.34 (-2.61, 2.07) | -2.40 (-2.65, 2.15) | -2.95 (-3.26, 2.64) | -2.04 (-2.26, 1.81) |
| Dominican Republic | 0.18 (0.11, 0.25) | 0.14 (0.08, 0.21) | 0.21 (0.13, 0.29) | -2.72 (-3.01, 2.43) | -2.92 (-3.32, 2.52) | -2.55 (-2.78, 2.32) | -3.07 (-3.32, 2.82) | -3.35 (-3.69, 3.01) | -2.76 (-2.96, 2.56) |
| Ecuador | -0.07 (-0.16, 0.03) | -0.15 (-0.24, 0.06) | -0.01 (-0.10, 0.08) | -0.96 (-1.53, 0.39) | -0.67 (-1.23, 0.12) | -1.17 (-1.74, 0.58) | -1.21 (-1.79, 0.62) | -1.26 (-1.87, 0.65) | -1.17 (-1.74, 0.59) |
| Egypt | -1.47 (-1.65, 1.30) | -1.46 (-1.64, 1.28) | -1.46 (-1.62, 1.29) | -3.60 (-3.77, 3.43) | -4.17 (-4.38, 3.95) | -2.62 (-2.76, 2.47) | -4.71 (-4.87, 4.55) | -5.13 (-5.33, 4.93) | -4.02 (-4.14, 3.91) |
| El Salvador | -1.07 (-1.18, 0.97) | -1.24 (-1.36, 1.13) | -0.97 (-1.07, 0.87) | -3.52 (-3.77, 3.27) | -4.25 (-4.54, 3.96) | -3.12 (-3.36, 2.88) | -3.90 (-4.14, 3.67) | -4.65 (-4.92, 4.39) | -3.41 (-3.64, 3.18) |
| Equatorial Guinea | -0.04 (-0.16, 0.08) | -0.01 (-0.14, 0.12) | -0.01 (-0.14, 0.11) | -3.04 (-3.26, 2.83) | -3.90 (-4.19, 3.60) | -1.96 (-2.08, 1.85) | -3.34 (-3.54, 3.15) | -4.20 (-4.46, 3.94) | -2.15 (-2.28, 2.01) |
| Eritrea | 0.20 (0.09, 0.32) | 0.25 (0.14, 0.36) | 0.18 (0.07, 0.29) | -1.12 (-1.24, 1.00) | -1.68 (-1.79, 1.57) | -0.28 (-0.40, 0.16) | -1.62 (-1.75, 1.50) | -2.21 (-2.32, 2.11) | -0.66 (-0.79, 0.53) |
| Estonia | 0.32 (0.06, 0.57) | 0.41 (0.13, 0.69) | 0.27 (0.03, 0.51) | 2.78 (1.03, 4.56) | 3.55 (1.74, 5.40) | 2.25 (0.52, 4.01) | 0.48 (-0.87, 1.85) | 1.26 (-0.11, 2.65) | 0.03 (-1.34, 1.42) |
| Eswatini | -0.05 (-0.07, 0.03) | -0.04 (-0.06, 0.03) | -0.05 (-0.08, 0.03) | -0.68 (-0.94, 0.42) | -0.76 (-1.06, 0.46) | -0.35 (-0.55, 0.14) | -0.45 (-0.72, 0.18) | -0.58 (-0.91, 0.26) | -0.08 (-0.29, 0.13) |
| Ethiopia | 0.11 (0.04, 0.18) | 0.15 (0.08, 0.23) | 0.07 (0.00, 0.13) | -2.29 (-2.41, 2.17) | -2.74 (-2.85, 2.62) | -1.53 (-1.65, 1.41) | -2.53 (-2.66, 2.41) | -3.12 (-3.25, 2.99) | -1.62 (-1.74, 1.50) |
| Fiji | -0.03 (-0.19, 0.14) | -0.06 (-0.22, 0.11) | -0.01 (-0.17, 0.15) | -1.24 (-1.34, 1.15) | -1.41 (-1.54, 1.29) | -1.19 (-1.28, 1.10) | -1.06 (-1.13, 0.99) | -1.14 (-1.21, 1.06) | -1.03 (-1.11, 0.95) |
| Finland | -0.91 (-1.12, 0.70) | -0.94 (-1.17, 0.71) | -0.91 (-1.10, 0.72) | -0.94 (-1.62, 0.26) | -1.75 (-2.42, 1.07) | -0.50 (-1.18, 0.19) | -1.03 (-1.67, 0.40) | -1.80 (-2.41, 1.19) | -0.61 (-1.26, 0.05) |
| France | -0.69 (-0.80, 0.58) | -0.69 (-0.78, 0.60) | -0.72 (-0.85, 0.59) | -1.12 (-1.39, 0.86) | -1.44 (-1.70, 1.19) | -0.90 (-1.17, 0.63) | -1.26 (-1.52, 1.00) | -1.61 (-1.86, 1.37) | -0.99 (-1.26, 0.72) |
| Gabon | -0.19 (-0.34, 0.05) | -0.18 (-0.32, 0.04) | -0.21 (-0.36, 0.06) | -1.48 (-1.55, 1.41) | -1.94 (-1.99, 1.88) | -0.95 (-1.06, 0.84) | -1.56 (-1.68, 1.44) | -1.94 (-2.05, 1.83) | -1.09 (-1.23, 0.94) |
| Gambia | -0.18 (-0.36, 0.01) | -0.21 (-0.40, 0.02) | -0.21 (-0.38, 0.04) | -0.80 (-0.93, 0.67) | -1.00 (-1.13, 0.87) | -0.33 (-0.49, 0.18) | -0.90 (-1.09, 0.72) | -1.21 (-1.40, 1.02) | -0.26 (-0.45, 0.06) |
| Georgia | 0.12 (0.07, 0.16) | 0.18 (0.13, 0.24) | 0.09 (0.04, 0.13) | 4.74 (3.90, 5.58) | 4.55 (3.68, 5.44) | 4.91 (4.09, 5.73) | 3.48 (2.55, 4.42) | 3.48 (2.55, 4.40) | 3.45 (2.47, 4.44) |
| Germany | -0.76 (-0.91, 0.61) | -0.85 (-1.02, 0.68) | -0.73 (-0.87, 0.59) | 0.52 (-0.29, 1.34) | -0.58 (-1.31, 0.15) | 1.09 (0.24, 1.95) | -0.84 (-1.53, 0.13) | -1.67 (-2.31, 1.02) | -0.27 (-1.01, 0.47) |
| Ghana | -1.48 (-1.65, 1.30) | -1.53 (-1.71, 1.36) | -1.47 (-1.65, 1.30) | -1.86 (-1.98, 1.73) | -1.73 (-1.86, 1.60) | -1.85 (-1.98, 1.73) | -1.94 (-2.06, 1.81) | -1.98 (-2.11, 1.84) | -1.79 (-1.91, 1.67) |
| Greece | -0.17 (-0.40, 0.06) | -0.14 (-0.38, 0.10) | -0.20 (-0.41, 0.01) | 0.81 (0.38, 1.25) | -0.19 (-0.58, 0.21) | 1.42 (0.92, 1.93) | 0.09 (-0.35, 0.54) | -0.75 (-1.15, 0.34) | 0.65 (0.14, 1.16) |
| Greenland | 0.59 (0.42, 0.75) | 0.58 (0.42, 0.75) | 0.56 (0.39, 0.72) | -5.24 (-5.55, 4.93) | -4.22 (-4.54, 3.89) | -5.44 (-5.77, 5.11) | -5.50 (-5.81, 5.18) | -5.25 (-5.61, 4.90) | -5.50 (-5.82, 5.18) |
| Grenada | 0.10 (0.05, 0.16) | 0.07 (-0.01, 0.14) | 0.16 (0.11, 0.21) | -4.67 (-5.32, 4.02) | -4.70 (-5.73, 3.66) | -3.88 (-4.22, 3.55) | -5.02 (-5.52, 4.51) | -5.35 (-6.07, 4.62) | -4.36 (-4.69, 4.03) |
| Guam | 0.00 (-0.08, 0.09) | -0.02 (-0.11, 0.07) | 0.00 (-0.08, 0.08) | -2.33 (-2.67, 1.99) | -1.92 (-2.24, 1.60) | -2.57 (-2.95, 2.18) | -1.12 (-1.39, 0.85) | -1.04 (-1.26, 0.82) | -1.21 (-1.54, 0.87) |
| Guatemala | -0.34 (-0.49, 0.19) | -0.42 (-0.57, 0.27) | -0.30 (-0.45, 0.16) | -5.93 (-6.54, 5.31) | -6.50 (-7.13, 5.86) | -5.56 (-6.17, 4.95) | -5.45 (-5.96, 4.94) | -5.98 (-6.50, 5.47) | -5.07 (-5.60, 4.54) |
| Guinea | -1.12 (-1.21, 1.03) | -1.13 (-1.22, 1.04) | -1.11 (-1.20, 1.02) | -0.52 (-0.65, 0.39) | -0.48 (-0.68, 0.28) | -0.56 (-0.61, 0.51) | -0.53 (-0.70, 0.37) | -0.61 (-0.82, 0.39) | -0.39 (-0.48, 0.31) |
| Guinea-Bissau | -1.00 (-1.09, 0.91) | -1.02 (-1.11, 0.93) | -1.00 (-1.09, 0.91) | -0.97 (-1.06, 0.88) | -1.14 (-1.26, 1.02) | -0.45 (-0.52, 0.38) | -1.02 (-1.17, 0.88) | -1.34 (-1.51, 1.17) | -0.36 (-0.48, 0.25) |
| Guyana | 0.23 (0.14, 0.33) | 0.18 (0.09, 0.26) | 0.27 (0.16, 0.37) | 0.29 (-1.55, 2.17) | -1.88 (-3.39, 0.34) | 1.68 (-0.48, 3.89) | -0.28 (-2.02, 1.49) | -2.45 (-3.87, 1.01) | 1.37 (-0.75, 3.54) |
| Haiti | 0.23 (0.13, 0.32) | 0.16 (0.08, 0.25) | 0.27 (0.17, 0.38) | -1.90 (-2.00, 1.81) | -2.15 (-2.30, 2.00) | -1.64 (-1.72, 1.57) | -1.87 (-2.00, 1.75) | -2.10 (-2.26, 1.94) | -1.57 (-1.66, 1.48) |
| Honduras | -0.40 (-0.54, 0.26) | -0.48 (-0.62, 0.34) | -0.36 (-0.51, 0.21) | -0.99 (-1.13, 0.85) | -1.42 (-1.53, 1.31) | -0.72 (-0.92, 0.52) | -1.52 (-1.64, 1.41) | -2.04 (-2.13, 1.96) | -1.20 (-1.35, 1.04) |
| Hungary | 0.21 (0.05, 0.37) | 0.27 (0.09, 0.44) | 0.16 (0.01, 0.32) | -1.45 (-2.26, 0.64) | -2.84 (-3.72, 1.96) | -0.45 (-1.18, 0.28) | -1.88 (-2.66, 1.09) | -3.20 (-4.06, 2.34) | -0.86 (-1.56, 0.16) |
| Iceland | -0.38 (-0.42, 0.35) | -0.36 (-0.39, 0.33) | -0.41 (-0.44, 0.37) | -0.70 (-1.44, 0.04) | -1.63 (-2.30, 0.94) | -0.43 (-1.17, 0.32) | -1.45 (-2.10, 0.80) | -2.15 (-2.70, 1.60) | -1.21 (-1.89, 0.52) |
| India | -0.10 (-0.11, 0.09) | -0.11 (-0.12, 0.10) | -0.11 (-0.13, 0.10) | -0.44 (-0.58, 0.30) | -0.99 (-1.09, 0.89) | 0.12 (-0.06, 0.30) | -1.16 (-1.24, 1.07) | -1.86 (-1.93, 1.79) | -0.40 (-0.52, 0.27) |
| Indonesia | 0.35 (0.30, 0.41) | 0.58 (0.49, 0.67) | 0.15 (0.09, 0.20) | -0.61 (-0.70, 0.51) | -0.90 (-1.01, 0.80) | -0.46 (-0.56, 0.36) | -0.89 (-0.99, 0.80) | -1.23 (-1.32, 1.13) | -0.65 (-0.76, 0.55) |
| Iran (Islamic Republic of) | -0.13 (-0.28, 0.03) | -0.13 (-0.31, 0.05) | -0.14 (-0.28, 0.01) | -2.45 (-2.55, 2.36) | -3.13 (-3.24, 3.02) | -1.76 (-1.85, 1.67) | -3.27 (-3.43, 3.11) | -3.88 (-4.06, 3.70) | -2.55 (-2.69, 2.41) |
| Iraq | -0.17 (-0.32, 0.03) | -0.16 (-0.33, 0.01) | -0.18 (-0.31, 0.05) | -1.80 (-1.86, 1.73) | -2.37 (-2.44, 2.29) | -1.47 (-1.55, 1.39) | -2.47 (-2.56, 2.37) | -3.02 (-3.11, 2.94) | -2.05 (-2.16, 1.94) |
| Ireland | -0.91 (-1.21, 0.62) | -0.93 (-1.23, 0.64) | -0.93 (-1.23, 0.63) | -1.14 (-1.79, 0.50) | -2.04 (-2.64, 1.43) | -0.53 (-1.21, 0.16) | -1.45 (-2.13, 0.76) | -2.37 (-3.00, 1.73) | -0.72 (-1.46, 0.03) |
| Israel | -0.18 (-0.23, 0.14) | -0.15 (-0.20, 0.10) | -0.22 (-0.27, 0.17) | -1.78 (-2.12, 1.43) | -2.17 (-2.53, 1.81) | -1.61 (-1.95, 1.28) | -2.41 (-2.76, 2.06) | -2.89 (-3.27, 2.50) | -2.11 (-2.44, 1.79) |
| Italy | -0.28 (-0.34, 0.21) | -0.26 (-0.33, 0.19) | -0.30 (-0.36, 0.25) | -3.26 (-3.77, 2.74) | -4.15 (-4.72, 3.57) | -2.68 (-3.17, 2.18) | -3.58 (-4.05, 3.12) | -4.42 (-4.94, 3.90) | -3.00 (-3.44, 2.55) |
| Jamaica | 0.04 (-0.04, 0.11) | 0.00 (-0.07, 0.07) | 0.07 (-0.01, 0.16) | -4.43 (-4.92, 3.94) | -5.02 (-5.56, 4.47) | -4.10 (-4.58, 3.62) | -4.86 (-5.29, 4.42) | -5.65 (-6.10, 5.19) | -4.39 (-4.82, 3.95) |
| Japan | 0.23 (0.20, 0.27) | 0.24 (0.19, 0.28) | 0.21 (0.18, 0.24) | -0.26 (-0.42, 0.11) | -0.52 (-0.70, 0.34) | -0.17 (-0.29, 0.04) | -1.31 (-1.56, 1.06) | -1.54 (-1.86, 1.23) | -1.13 (-1.33, 0.93) |
| Jordan | 0.07 (-0.04, 0.19) | 0.09 (-0.04, 0.23) | 0.08 (-0.02, 0.18) | 0.88 (0.41, 1.35) | 1.09 (0.39, 1.79) | 0.93 (0.53, 1.33) | 0.57 (0.09, 1.05) | 0.92 (0.26, 1.58) | 0.37 (0.00, 0.74) |
| Kazakhstan | 0.30 (0.12, 0.47) | 0.40 (0.22, 0.58) | 0.24 (0.07, 0.41) | -0.23 (-0.42, 0.03) | -0.48 (-0.75, 0.21) | 0.01 (-0.15, 0.17) | -0.97 (-1.26, 0.68) | -1.30 (-1.72, 0.88) | -0.62 (-0.79, 0.44) |
| Kenya | -0.23 (-0.30, 0.15) | -0.17 (-0.26, 0.09) | -0.28 (-0.35, 0.21) | -0.37 (-0.47, 0.27) | -0.68 (-0.87, 0.48) | 0.14 (-0.03, 0.30) | -0.57 (-0.70, 0.44) | -0.94 (-1.13, 0.75) | -0.10 (-0.26, 0.06) |
| Kiribati | 0.00 (-0.09, 0.08) | -0.03 (-0.12, 0.06) | 0.00 (-0.08, 0.08) | -0.65 (-0.69, 0.60) | -0.80 (-0.86, 0.74) | -0.56 (-0.60, 0.52) | -0.68 (-0.73, 0.62) | -0.88 (-0.95, 0.80) | -0.54 (-0.58, 0.49) |
| Kuwait | -0.08 (-0.22, 0.06) | -0.09 (-0.25, 0.06) | -0.13 (-0.24, 0.01) | 3.62 (2.01, 5.25) | 4.50 (2.69, 6.35) | 2.38 (0.99, 3.78) | 3.11 (1.51, 4.74) | 3.88 (2.09, 5.71) | 1.88 (0.54, 3.23) |
| Kyrgyzstan | -0.25 (-0.40, 0.10) | -0.19 (-0.35, 0.03) | -0.27 (-0.41, 0.12) | -2.25 (-2.71, 1.80) | -2.58 (-3.08, 2.08) | -2.06 (-2.46, 1.65) | -2.64 (-3.09, 2.19) | -2.94 (-3.46, 2.41) | -2.42 (-2.80, 2.03) |
| Lao People's Democratic Republic | 0.05 (0.00, 0.09) | 0.12 (0.06, 0.17) | 0.00 (-0.04, 0.04) | -1.43 (-1.51, 1.35) | -2.09 (-2.17, 2.02) | -0.89 (-0.99, 0.79) | -1.40 (-1.49, 1.31) | -2.06 (-2.15, 1.98) | -0.78 (-0.88, 0.68) |
| Latvia | -0.04 (-0.34, 0.26) | 0.01 (-0.32, 0.35) | -0.06 (-0.33, 0.22) | 5.63 (3.48, 7.82) | 6.15 (3.96, 8.40) | 5.16 (3.04, 7.32) | 3.32 (1.51, 5.17) | 4.13 (2.23, 6.06) | 2.73 (0.95, 4.54) |
| Lebanon | -0.10 (-0.23, 0.03) | -0.08 (-0.24, 0.07) | -0.11 (-0.23, 0.00) | -3.06 (-3.19, 2.94) | -3.47 (-3.63, 3.31) | -2.89 (-3.02, 2.76) | -3.55 (-3.64, 3.45) | -3.71 (-3.78, 3.64) | -3.47 (-3.58, 3.36) |
| Lesotho | -0.05 (-0.07, 0.03) | -0.03 (-0.04, 0.01) | -0.03 (-0.06, 0.01) | 0.49 (0.22, 0.77) | 0.10 (-0.16, 0.37) | 0.67 (0.38, 0.96) | 0.80 (0.49, 1.10) | 0.48 (0.17, 0.80) | 0.97 (0.66, 1.28) |
| Liberia | -1.34 (-1.56, 1.12) | -1.35 (-1.57, 1.13) | -1.33 (-1.54, 1.11) | -1.25 (-1.36, 1.14) | -1.54 (-1.67, 1.41) | -0.62 (-0.69, 0.54) | -1.51 (-1.67, 1.34) | -1.92 (-2.10, 1.73) | -0.70 (-0.82, 0.57) |
| Libya | 0.15 (-0.03, 0.33) | 0.17 (-0.04, 0.37) | 0.11 (-0.04, 0.27) | 1.61 (1.24, 1.98) | 1.71 (1.25, 2.18) | 1.45 (1.14, 1.75) | 1.16 (0.77, 1.56) | 1.37 (0.87, 1.87) | 0.83 (0.55, 1.11) |
| Lithuania | 0.25 (-0.02, 0.52) | 0.33 (0.03, 0.62) | 0.19 (-0.05, 0.44) | 3.90 (2.08, 5.74) | 4.77 (2.90, 6.68) | 3.16 (1.37, 4.97) | 1.92 (0.34, 3.52) | 2.95 (1.30, 4.63) | 1.13 (-0.42, 2.70) |
| Luxembourg | -0.70 (-0.89, 0.52) | -0.72 (-0.92, 0.52) | -0.71 (-0.88, 0.54) | -1.05 (-1.77, 0.32) | -2.07 (-2.68, 1.46) | -0.54 (-1.29, 0.22) | -1.93 (-2.55, 1.30) | -2.98 (-3.48, 2.47) | -1.36 (-2.05, 0.67) |
| Madagascar | 0.16 (0.04, 0.29) | 0.20 (0.07, 0.33) | 0.12 (0.00, 0.24) | -0.87 (-0.92, 0.82) | -1.18 (-1.26, 1.10) | -0.25 (-0.28, 0.22) | -1.00 (-1.06, 0.94) | -1.40 (-1.49, 1.30) | -0.30 (-0.34, 0.26) |
| Malawi | 0.13 (-0.01, 0.28) | 0.17 (0.03, 0.32) | 0.08 (-0.07, 0.22) | -1.06 (-1.20, 0.91) | -1.12 (-1.33, 0.92) | -0.57 (-0.62, 0.51) | -1.47 (-1.63, 1.32) | -1.70 (-1.90, 1.50) | -0.86 (-0.95, 0.78) |
| Malaysia | -0.28 (-0.36, 0.19) | -0.21 (-0.29, 0.14) | -0.32 (-0.42, 0.23) | -0.37 (-0.56, 0.17) | -0.82 (-1.04, 0.59) | -0.02 (-0.22, 0.18) | -0.55 (-0.82, 0.28) | -0.94 (-1.25, 0.63) | -0.28 (-0.53, 0.02) |
| Maldives | -0.27 (-0.38, 0.15) | -0.21 (-0.32, 0.09) | -0.30 (-0.42, 0.17) | -3.36 (-3.45, 3.27) | -3.62 (-3.74, 3.50) | -2.84 (-2.94, 2.74) | -3.44 (-3.50, 3.38) | -3.72 (-3.81, 3.63) | -2.95 (-3.02, 2.88) |
| Mali | -1.72 (-1.98, 1.47) | -1.74 (-1.99, 1.48) | -1.69 (-1.95, 1.44) | -0.66 (-0.71, 0.60) | -0.82 (-0.91, 0.74) | -0.47 (-0.51, 0.44) | -0.69 (-0.76, 0.62) | -0.92 (-1.01, 0.83) | -0.39 (-0.45, 0.33) |
| Malta | -0.61 (-0.74, 0.47) | -0.60 (-0.75, 0.46) | -0.60 (-0.73, 0.48) | -0.57 (-1.29, 0.16) | -1.64 (-2.33, 0.94) | -0.08 (-0.82, 0.67) | -0.51 (-1.11, 0.10) | -1.52 (-2.06, 0.97) | 0.05 (-0.59, 0.70) |
| Marshall Islands | 0.00 (-0.08, 0.08) | 0.00 (-0.09, 0.09) | 0.02 (-0.07, 0.10) | -1.20 (-1.28, 1.13) | -1.17 (-1.26, 1.08) | -1.05 (-1.14, 0.97) | -0.85 (-0.98, 0.73) | -1.03 (-1.17, 0.89) | -0.67 (-0.80, 0.55) |
| Mauritania | -0.86 (-1.01, 0.71) | -0.88 (-1.03, 0.72) | -0.84 (-0.99, 0.69) | -1.19 (-1.24, 1.14) | -1.59 (-1.64, 1.54) | -0.80 (-0.88, 0.73) | -1.27 (-1.38, 1.16) | -1.76 (-1.88, 1.64) | -0.68 (-0.80, 0.57) |
| Mauritius | -0.26 (-0.30, 0.23) | -0.18 (-0.21, 0.15) | -0.33 (-0.38, 0.28) | 4.73 (4.05, 5.43) | 4.53 (3.69, 5.37) | 4.90 (4.24, 5.57) | 5.50 (4.60, 6.41) | 5.39 (4.36, 6.43) | 5.62 (4.75, 6.49) |
| Mexico | -0.21 (-0.40, 0.01) | -0.28 (-0.48, 0.09) | -0.16 (-0.35, 0.04) | -1.94 (-2.36, 1.51) | -2.42 (-2.96, 1.87) | -1.76 (-2.11, 1.41) | -2.14 (-2.54, 1.73) | -2.90 (-3.41, 2.37) | -1.58 (-1.90, 1.26) |
| Micronesia (Federated States of) | 0.03 (-0.05, 0.11) | 0.01 (-0.07, 0.10) | 0.04 (-0.04, 0.11) | -1.33 (-1.43, 1.23) | -1.36 (-1.40, 1.31) | -1.30 (-1.42, 1.18) | -1.20 (-1.25, 1.14) | -1.37 (-1.39, 1.34) | -1.08 (-1.15, 1.00) |
| Monaco | -0.52 (-0.58, 0.46) | -0.52 (-0.58, 0.47) | -0.53 (-0.59, 0.48) | -0.62 (-0.82, 0.41) | -0.79 (-0.93, 0.65) | -0.52 (-0.76, 0.27) | -0.90 (-1.11, 0.68) | -1.01 (-1.16, 0.87) | -0.84 (-1.11, 0.57) |
| Mongolia | 0.59 (0.46, 0.73) | 0.66 (0.53, 0.79) | 0.53 (0.40, 0.66) | -0.41 (-0.56, 0.26) | -0.52 (-0.67, 0.38) | -0.40 (-0.57, 0.22) | -0.52 (-0.65, 0.38) | -0.42 (-0.55, 0.28) | -0.69 (-0.83, 0.54) |
| Montenegro | 0.15 (0.05, 0.25) | 0.21 (0.10, 0.32) | 0.11 (0.02, 0.20) | -1.02 (-1.25, 0.78) | -1.46 (-1.77, 1.15) | -0.71 (-0.90, 0.51) | -1.41 (-1.60, 1.23) | -1.73 (-1.96, 1.49) | -1.18 (-1.35, 1.02) |
| Morocco | -0.13 (-0.26, 0.01) | -0.09 (-0.25, 0.06) | -0.15 (-0.26, 0.03) | 1.61 (1.29, 1.94) | 1.20 (0.87, 1.53) | 1.94 (1.62, 2.26) | 0.19 (-0.18, 0.56) | -0.34 (-0.76, 0.07) | 0.75 (0.43, 1.07) |
| Mozambique | 0.23 (0.13, 0.34) | 0.27 (0.17, 0.38) | 0.19 (0.09, 0.30) | -0.04 (-0.21, 0.13) | 0.11 (-0.11, 0.33) | 0.04 (-0.07, 0.15) | -0.35 (-0.51, 0.20) | -0.34 (-0.54, 0.15) | -0.14 (-0.23, 0.04) |
| Myanmar | -0.12 (-0.18, 0.05) | -0.05 (-0.11, 0.00) | -0.17 (-0.25, 0.10) | -1.43 (-1.58, 1.27) | -1.59 (-1.70, 1.47) | -1.29 (-1.48, 1.11) | -1.54 (-1.71, 1.37) | -1.76 (-1.91, 1.61) | -1.33 (-1.52, 1.13) |
| Namibia | -0.05 (-0.16, 0.06) | -0.06 (-0.17, 0.05) | -0.06 (-0.17, 0.06) | -0.66 (-0.77, 0.54) | -0.83 (-0.99, 0.67) | -0.19 (-0.24, 0.14) | -0.62 (-0.72, 0.52) | -0.84 (-1.01, 0.67) | -0.14 (-0.20, 0.08) |
| Nauru | 0.03 (-0.05, 0.10) | -0.03 (-0.12, 0.05) | 0.00 (-0.08, 0.07) | 0.57 (0.22, 0.92) | -0.46 (-0.83, 0.10) | 0.98 (0.60, 1.36) | -0.07 (-0.45, 0.32) | -0.53 (-0.95, 0.12) | 0.13 (-0.25, 0.51) |
| Nepal | 0.21 (0.13, 0.30) | 0.19 (0.10, 0.28) | 0.18 (0.10, 0.27) | -0.65 (-0.78, 0.51) | -1.24 (-1.32, 1.16) | -0.15 (-0.33, 0.03) | -1.40 (-1.42, 1.37) | -2.14 (-2.20, 2.07) | -0.68 (-0.72, 0.65) |
| Netherlands | -0.22 (-0.23, 0.21) | -0.22 (-0.24, 0.21) | -0.24 (-0.25, 0.23) | -0.87 (-1.75, 0.02) | -1.84 (-2.61, 1.07) | -0.33 (-1.26, 0.61) | -1.37 (-2.14, 0.59) | -2.25 (-2.95, 1.55) | -0.83 (-1.65, 0.01) |
| New Zealand | 0.20 (0.15, 0.24) | 0.19 (0.14, 0.24) | 0.19 (0.15, 0.23) | -1.27 (-2.08, 0.45) | -0.06 (-1.94, 1.85) | -1.39 (-2.12, 0.66) | -1.58 (-2.38, 0.77) | -0.55 (-2.29, 1.22) | -1.72 (-2.43, 1.00) |
| Nicaragua | -0.19 (-0.40, 0.03) | -0.25 (-0.47, 0.03) | -0.15 (-0.36, 0.06) | -3.92 (-4.20, 3.64) | -5.05 (-5.36, 4.75) | -3.34 (-3.62, 3.07) | -4.46 (-4.69, 4.24) | -5.51 (-5.74, 5.27) | -3.76 (-3.99, 3.53) |
| Niger | -1.11 (-1.21, 1.02) | -1.15 (-1.25, 1.06) | -1.12 (-1.22, 1.03) | -0.63 (-0.69, 0.57) | -0.78 (-0.85, 0.71) | -0.39 (-0.44, 0.34) | -0.94 (-1.03, 0.85) | -1.20 (-1.30, 1.10) | -0.48 (-0.56, 0.40) |
| Nigeria | -0.80 (-0.93, 0.67) | -0.91 (-1.04, 0.78) | -0.81 (-0.94, 0.69) | -2.05 (-2.23, 1.87) | -1.96 (-2.13, 1.78) | -2.22 (-2.44, 2.00) | -1.49 (-1.66, 1.31) | -1.35 (-1.54, 1.16) | -1.69 (-1.89, 1.49) |
| Niue | 0.02 (-0.06, 0.10) | 0.01 (-0.08, 0.09) | 0.03 (-0.05, 0.11) | -1.18 (-1.46, 0.90) | -1.32 (-1.52, 1.12) | -1.00 (-1.34, 0.66) | -0.53 (-1.04, 0.02) | -0.77 (-1.15, 0.40) | -0.34 (-0.94, 0.26) |
| North Macedonia | 0.45 (0.32, 0.58) | 0.50 (0.37, 0.63) | 0.40 (0.28, 0.52) | -1.05 (-1.25, 0.86) | -2.31 (-2.43, 2.19) | -0.32 (-0.57, 0.07) | -1.59 (-1.84, 1.34) | -2.62 (-2.80, 2.43) | -0.98 (-1.26, 0.70) |
| Northern Mariana Islands | 0.02 (-0.06, 0.11) | -0.02 (-0.10, 0.07) | 0.01 (-0.07, 0.09) | -0.54 (-0.66, 0.41) | -0.24 (-0.37, 0.11) | -0.84 (-0.96, 0.72) | -0.46 (-0.55, 0.38) | -0.30 (-0.44, 0.15) | -0.67 (-0.74, 0.59) |
| Norway | -0.15 (-0.20, 0.11) | -0.11 (-0.16, 0.06) | -0.20 (-0.24, 0.15) | -4.24 (-5.55, 2.92) | -4.21 (-5.82, 2.58) | -4.27 (-5.42, 3.10) | -5.13 (-6.23, 4.03) | -5.28 (-6.63, 3.92) | -5.05 (-6.01, 4.07) |
| Oman | -0.05 (-0.19, 0.10) | -0.02 (-0.19, 0.14) | -0.08 (-0.20, 0.04) | 1.51 (0.42, 2.61) | 1.77 (0.49, 3.06) | 1.32 (0.36, 2.29) | 1.16 (0.06, 2.27) | 1.31 (0.00, 2.63) | 1.02 (0.08, 1.98) |
| Pakistan | -0.06 (-0.17, 0.06) | -0.09 (-0.20, 0.02) | -0.06 (-0.17, 0.05) | -0.21 (-0.35, 0.06) | -0.60 (-0.71, 0.50) | 0.12 (-0.09, 0.34) | -0.30 (-0.41, 0.19) | -0.68 (-0.83, 0.53) | 0.09 (0.00, 0.17) |
| Palau | -0.03 (-0.11, 0.06) | -0.03 (-0.12, 0.05) | 0.01 (-0.07, 0.09) | -1.12 (-1.19, 1.04) | -1.34 (-1.43, 1.25) | -0.73 (-0.80, 0.65) | -1.05 (-1.12, 0.98) | -1.15 (-1.23, 1.07) | -0.86 (-0.91, 0.80) |
| Palestine | -0.18 (-0.42, 0.06) | -0.16 (-0.41, 0.10) | -0.17 (-0.40, 0.06) | -1.73 (-1.83, 1.64) | -2.28 (-2.38, 2.18) | -1.36 (-1.45, 1.28) | -2.10 (-2.29, 1.90) | -2.54 (-2.78, 2.30) | -1.70 (-1.85, 1.55) |
| Panama | -0.39 (-0.51, 0.26) | -0.47 (-0.59, 0.34) | -0.33 (-0.46, 0.20) | -4.82 (-5.49, 4.14) | -5.40 (-6.14, 4.64) | -4.65 (-5.30, 4.01) | -4.48 (-5.08, 3.89) | -4.86 (-5.51, 4.21) | -4.36 (-4.94, 3.78) |
| Papua New Guinea | -0.03 (-0.12, 0.05) | -0.05 (-0.14, 0.04) | -0.01 (-0.09, 0.07) | -0.39 (-0.44, 0.34) | -0.61 (-0.65, 0.57) | -0.21 (-0.30, 0.12) | -0.29 (-0.34, 0.23) | -0.56 (-0.65, 0.46) | -0.08 (-0.16, 0.00) |
| Paraguay | 0.32 (0.10, 0.53) | 0.29 (0.07, 0.51) | 0.34 (0.13, 0.56) | -0.25 (-0.38, 0.12) | -0.18 (-0.36, 0.00) | -0.31 (-0.42, 0.20) | -0.74 (-0.88, 0.60) | -0.74 (-0.95, 0.54) | -0.74 (-0.85, 0.63) |
| Peru | 0.22 (0.14, 0.31) | 0.17 (0.09, 0.25) | 0.27 (0.17, 0.36) | -2.04 (-2.22, 1.87) | -2.34 (-2.51, 2.17) | -1.83 (-2.02, 1.63) | -2.38 (-2.54, 2.22) | -2.85 (-3.04, 2.67) | -2.02 (-2.17, 1.87) |
| Philippines | 0.11 (0.00, 0.21) | 0.21 (0.11, 0.30) | 0.01 (-0.11, 0.13) | -0.87 (-1.08, 0.66) | -1.34 (-1.62, 1.07) | -0.58 (-0.76, 0.40) | -1.04 (-1.24, 0.84) | -1.59 (-1.83, 1.35) | -0.62 (-0.80, 0.43) |
| Poland | 0.24 (0.13, 0.35) | 0.27 (0.15, 0.39) | 0.20 (0.10, 0.31) | -1.33 (-1.71, 0.95) | -2.17 (-2.66, 1.67) | -0.71 (-1.05, 0.37) | -1.58 (-1.92, 1.25) | -2.40 (-2.85, 1.95) | -0.97 (-1.28, 0.66) |
| Portugal | -0.18 (-0.27, 0.10) | -0.17 (-0.26, 0.08) | -0.20 (-0.28, 0.12) | -0.48 (-1.13, 0.17) | -1.56 (-2.12, 0.99) | 0.02 (-0.67, 0.71) | -1.65 (-2.20, 1.10) | -2.64 (-3.14, 2.14) | -1.12 (-1.70, 0.53) |
| Puerto Rico | 0.20 (0.12, 0.28) | 0.16 (0.08, 0.24) | 0.23 (0.14, 0.31) | -6.64 (-7.02, 6.25) | -7.22 (-7.67, 6.75) | -6.19 (-6.53, 5.84) | -6.72 (-7.13, 6.32) | -7.29 (-7.78, 6.79) | -6.20 (-6.55, 5.85) |
| Qatar | -0.13 (-0.27, 0.01) | -0.10 (-0.26, 0.06) | -0.13 (-0.24, 0.01) | -0.06 (-0.54, 0.43) | 0.10 (-0.54, 0.74) | -0.13 (-0.53, 0.28) | -0.15 (-0.76, 0.45) | -0.09 (-0.79, 0.62) | -0.20 (-0.71, 0.32) |
| Republic of Korea | 0.07 (0.01, 0.13) | 0.04 (-0.03, 0.10) | 0.06 (0.00, 0.12) | -2.67 (-2.72, 2.62) | -3.50 (-3.56, 3.44) | -2.23 (-2.29, 2.18) | -3.11 (-3.17, 3.06) | -3.85 (-3.93, 3.77) | -2.62 (-2.68, 2.56) |
| Republic of Moldova | 0.32 (0.06, 0.58) | 0.37 (0.09, 0.66) | 0.29 (0.05, 0.53) | 4.88 (2.72, 7.08) | 5.91 (3.71, 8.16) | 4.47 (2.32, 6.68) | 1.63 (0.64, 2.62) | 1.63 (0.92, 2.34) | 1.68 (0.55, 2.83) |
| Romania | 0.48 (0.37, 0.60) | 0.53 (0.41, 0.65) | 0.43 (0.33, 0.54) | -0.36 (-0.67, 0.05) | -0.82 (-1.20, 0.44) | 0.00 (-0.27, 0.27) | -0.36 (-0.66, 0.07) | -0.99 (-1.36, 0.61) | 0.13 (-0.12, 0.38) |
| Russian Federation | 0.10 (-0.21, 0.41) | 0.14 (-0.19, 0.48) | 0.09 (-0.21, 0.38) | -4.53 (-4.97, 4.10) | -4.70 (-5.15, 4.26) | -4.42 (-4.83, 4.00) | -4.81 (-5.26, 4.36) | -5.09 (-5.56, 4.61) | -4.44 (-4.86, 4.00) |
| Rwanda | 0.16 (-0.03, 0.35) | 0.19 (0.00, 0.39) | 0.13 (-0.06, 0.32) | -3.05 (-3.30, 2.79) | -3.44 (-3.72, 3.15) | -2.31 (-2.54, 2.08) | -3.62 (-3.89, 3.35) | -4.16 (-4.47, 3.86) | -2.82 (-3.06, 2.57) |
| Saint Kitts and Nevis | 0.36 (0.27, 0.44) | 0.31 (0.21, 0.41) | 0.41 (0.33, 0.48) | -4.22 (-4.83, 3.62) | -5.12 (-5.72, 4.51) | -4.27 (-4.88, 3.66) | -4.95 (-5.48, 4.41) | -4.18 (-4.58, 3.77) | -5.01 (-5.57, 4.46) |
| Saint Lucia | -0.14 (-0.38, 0.10) | -0.18 (-0.43, 0.07) | -0.07 (-0.30, 0.16) | -5.16 (-5.73, 4.59) | -5.25 (-5.93, 4.58) | -5.13 (-5.61, 4.64) | -5.07 (-5.58, 4.55) | -5.21 (-5.82, 4.59) | -4.93 (-5.35, 4.50) |
| Saint Vincent and the Grenadines | -0.02 (-0.15, 0.12) | -0.04 (-0.18, 0.09) | 0.05 (-0.09, 0.19) | -3.06 (-4.08, 2.03) | -2.41 (-3.74, 1.06) | -4.65 (-5.13, 4.16) | -3.65 (-4.63, 2.65) | -3.21 (-4.49, 1.92) | -4.55 (-5.01, 4.09) |
| Samoa | 0.06 (-0.09, 0.21) | 0.04 (-0.11, 0.20) | 0.08 (-0.07, 0.22) | -1.00 (-1.06, 0.94) | -1.34 (-1.41, 1.27) | -0.72 (-0.78, 0.66) | -0.81 (-0.87, 0.76) | -1.24 (-1.29, 1.18) | -0.54 (-0.60, 0.48) |
| San Marino | -0.42 (-0.45, 0.39) | -0.41 (-0.45, 0.38) | -0.45 (-0.48, 0.41) | -1.34 (-1.67, 1.01) | -1.68 (-2.08, 1.27) | -1.07 (-1.37, 0.76) | -1.45 (-1.68, 1.22) | -1.88 (-2.13, 1.62) | -1.15 (-1.36, 0.93) |
| Sao Tome and Principe | -0.79 (-0.90, 0.67) | -0.79 (-0.90, 0.67) | -0.76 (-0.87, 0.65) | -0.70 (-0.82, 0.57) | -1.18 (-1.31, 1.05) | -0.22 (-0.41, 0.04) | -1.25 (-1.41, 1.08) | -1.91 (-2.09, 1.74) | -0.32 (-0.59, 0.04) |
| Saudi Arabia | -0.66 (-0.81, 0.51) | -0.64 (-0.78, 0.50) | -0.67 (-0.82, 0.51) | -1.32 (-1.81, 0.83) | -1.93 (-2.46, 1.39) | -0.89 (-1.38, 0.40) | -2.03 (-2.54, 1.52) | -2.90 (-3.46, 2.33) | -1.43 (-1.93, 0.93) |
| Senegal | -1.31 (-1.45, 1.18) | -1.31 (-1.46, 1.16) | -1.32 (-1.45, 1.19) | -1.00 (-1.12, 0.88) | -1.33 (-1.49, 1.17) | -0.29 (-0.39, 0.19) | -1.24 (-1.45, 1.04) | -1.69 (-1.93, 1.45) | -0.39 (-0.55, 0.23) |
| Serbia | 0.80 (0.58, 1.01) | 0.88 (0.65, 1.10) | 0.74 (0.53, 0.94) | -1.70 (-1.86, 1.55) | -1.97 (-2.10, 1.85) | -1.45 (-1.63, 1.27) | -1.54 (-1.65, 1.44) | -2.03 (-2.16, 1.91) | -1.19 (-1.30, 1.09) |
| Seychelles | -0.18 (-0.25, 0.11) | -0.12 (-0.17, 0.07) | -0.23 (-0.31, 0.15) | -0.93 (-1.04, 0.81) | -1.55 (-1.69, 1.41) | -0.55 (-0.66, 0.43) | -0.83 (-0.94, 0.72) | -1.29 (-1.47, 1.11) | -0.47 (-0.60, 0.35) |
| Sierra Leone | -1.64 (-1.79, 1.48) | -1.64 (-1.80, 1.49) | -1.62 (-1.78, 1.47) | -1.04 (-1.17, 0.91) | -1.33 (-1.51, 1.16) | -0.35 (-0.42, 0.28) | -1.08 (-1.21, 0.95) | -1.43 (-1.61, 1.25) | -0.23 (-0.30, 0.16) |
| Singapore | 0.37 (0.32, 0.42) | 0.40 (0.34, 0.46) | 0.32 (0.28, 0.37) | -2.71 (-3.17, 2.26) | -3.33 (-3.78, 2.89) | -2.41 (-2.88, 1.94) | -3.20 (-3.57, 2.82) | -3.91 (-4.31, 3.51) | -2.79 (-3.18, 2.41) |
| Slovakia | 0.91 (0.72, 1.10) | 0.98 (0.78, 1.18) | 0.85 (0.67, 1.02) | -1.37 (-1.64, 1.10) | -2.45 (-2.77, 2.13) | -0.73 (-0.97, 0.49) | -1.47 (-1.71, 1.23) | -2.51 (-2.79, 2.23) | -0.82 (-1.02, 0.61) |
| Slovenia | 0.39 (0.26, 0.52) | 0.45 (0.30, 0.59) | 0.35 (0.23, 0.46) | -0.06 (-0.32, 0.20) | -0.66 (-0.96, 0.35) | 0.31 (0.05, 0.57) | -0.81 (-1.03, 0.60) | -1.36 (-1.61, 1.11) | -0.41 (-0.63, 0.19) |
| Solomon Islands | 0.01 (-0.07, 0.10) | -0.04 (-0.13, 0.06) | 0.02 (-0.06, 0.09) | -0.54 (-0.60, 0.49) | -0.85 (-0.89, 0.82) | -0.22 (-0.30, 0.15) | -0.57 (-0.64, 0.50) | -0.93 (-0.98, 0.87) | -0.20 (-0.30, 0.11) |
| Somalia | 0.23 (0.12, 0.35) | 0.26 (0.15, 0.38) | 0.19 (0.08, 0.30) | -0.91 (-1.01, 0.80) | -0.96 (-1.05, 0.87) | -0.34 (-0.47, 0.20) | -1.09 (-1.21, 0.96) | -1.26 (-1.38, 1.15) | -0.46 (-0.60, 0.31) |
| South Africa | -0.09 (-0.16, 0.01) | -0.09 (-0.16, 0.02) | -0.08 (-0.16, 0.00) | -0.22 (-0.44, 0.00) | -0.55 (-0.88, 0.22) | 0.19 (0.00, 0.39) | -0.52 (-0.75, 0.30) | -0.81 (-1.10, 0.52) | -0.14 (-0.42, 0.14) |
| South Sudan | 0.46 (0.29, 0.62) | 0.46 (0.30, 0.63) | 0.39 (0.22, 0.55) | -1.11 (-1.43, 0.79) | -1.26 (-1.59, 0.93) | -0.53 (-0.87, 0.18) | -0.98 (-1.41, 0.55) | -1.17 (-1.60, 0.73) | -0.36 (-0.80, 0.08) |
| Spain | -0.20 (-0.26, 0.13) | -0.21 (-0.27, 0.15) | -0.20 (-0.27, 0.13) | -0.76 (-1.42, 0.10) | -1.77 (-2.31, 1.22) | -0.34 (-1.05, 0.38) | -1.56 (-2.12, 1.01) | -2.55 (-3.03, 2.07) | -1.01 (-1.62, 0.40) |
| Sri Lanka | -0.18 (-0.24, 0.12) | -0.13 (-0.17, 0.08) | -0.24 (-0.31, 0.17) | 0.93 (0.51, 1.35) | 0.40 (-0.03, 0.82) | 1.28 (0.86, 1.71) | 0.37 (0.00, 0.73) | -0.30 (-0.67, 0.07) | 0.89 (0.51, 1.28) |
| Sudan | -0.20 (-0.32, 0.07) | -0.18 (-0.33, 0.04) | -0.20 (-0.31, 0.09) | 1.06 (0.68, 1.44) | 0.98 (0.52, 1.43) | 1.19 (0.89, 1.50) | 0.61 (0.17, 1.05) | 0.55 (0.04, 1.06) | 0.73 (0.37, 1.09) |
| Suriname | 0.18 (0.09, 0.28) | 0.12 (0.03, 0.21) | 0.21 (0.12, 0.31) | -3.15 (-3.42, 2.88) | -3.90 (-4.24, 3.57) | -2.62 (-2.85, 2.40) | -3.62 (-3.90, 3.34) | -4.43 (-4.76, 4.09) | -2.92 (-3.16, 2.69) |
| Sweden | 0.12 (0.07, 0.16) | 0.21 (0.14, 0.27) | 0.07 (0.03, 0.10) | -0.65 (-1.13, 0.18) | -1.65 (-2.36, 0.93) | -0.03 (-0.42, 0.36) | -1.33 (-1.74, 0.92) | -2.31 (-2.93, 1.69) | -0.67 (-1.01, 0.33) |
| Switzerland | -0.35 (-0.42, 0.29) | -0.41 (-0.50, 0.32) | -0.30 (-0.35, 0.26) | -2.31 (-2.70, 1.91) | -3.05 (-3.50, 2.59) | -1.85 (-2.22, 1.48) | -3.00 (-3.36, 2.64) | -3.70 (-4.08, 3.31) | -2.49 (-2.85, 2.14) |
| Syrian Arab Republic | -0.17 (-0.56, 0.23) | -0.17 (-0.58, 0.25) | -0.20 (-0.56, 0.17) | -1.92 (-2.24, 1.60) | -2.35 (-2.69, 2.01) | -1.50 (-1.76, 1.24) | -2.23 (-2.71, 1.75) | -2.87 (-3.39, 2.34) | -1.79 (-2.16, 1.41) |
| Taiwan (Province of China) | 0.11 (0.09, 0.13) | 0.17 (0.14, 0.19) | 0.04 (0.01, 0.07) | 5.40 (3.99, 6.83) | 5.54 (3.94, 7.16) | 5.29 (3.95, 6.64) | 4.76 (3.48, 6.06) | 4.91 (3.47, 6.38) | 4.61 (3.40, 5.83) |
| Tajikistan | 0.06 (0.02, 0.10) | 0.13 (0.09, 0.18) | 0.05 (0.01, 0.08) | -1.65 (-1.93, 1.37) | -2.03 (-2.34, 1.72) | -1.37 (-1.63, 1.10) | -1.54 (-1.69, 1.40) | -1.92 (-2.11, 1.72) | -1.18 (-1.27, 1.08) |
| Thailand | -0.15 (-0.24, 0.07) | -0.10 (-0.18, 0.03) | -0.20 (-0.29, 0.10) | -1.16 (-1.34, 0.98) | -1.79 (-1.98, 1.61) | -0.78 (-0.96, 0.59) | -1.20 (-1.42, 0.99) | -1.65 (-1.88, 1.43) | -0.90 (-1.11, 0.69) |
| Timor-Leste | -0.13 (-0.19, 0.07) | -0.07 (-0.11, 0.02) | -0.20 (-0.27, 0.13) | -0.60 (-0.80, 0.40) | -0.91 (-1.10, 0.71) | -0.37 (-0.56, 0.17) | -0.75 (-0.99, 0.51) | -1.18 (-1.40, 0.97) | -0.37 (-0.63, 0.11) |
| Togo | -1.41 (-1.69, 1.13) | -1.43 (-1.71, 1.15) | -1.42 (-1.70, 1.14) | -0.71 (-0.84, 0.58) | -0.75 (-0.98, 0.52) | -0.29 (-0.37, 0.22) | -0.82 (-0.97, 0.67) | -1.01 (-1.24, 0.77) | -0.33 (-0.41, 0.25) |
| Tokelau | -0.59 (-0.76, 0.43) | -0.65 (-0.81, 0.48) | -0.53 (-0.69, 0.37) | -1.04 (-1.36, 0.71) | -1.49 (-1.75, 1.22) | -0.77 (-1.14, 0.40) | -0.75 (-1.43, 0.08) | -1.26 (-1.89, 0.63) | -0.43 (-1.14, 0.28) |
| Tonga | -0.03 (-0.10, 0.05) | -0.04 (-0.12, 0.03) | -0.02 (-0.09, 0.06) | -1.04 (-1.10, 0.97) | -1.01 (-1.12, 0.90) | -1.06 (-1.10, 1.02) | -0.95 (-1.02, 0.88) | -0.98 (-1.08, 0.87) | -0.93 (-0.98, 0.88) |
| Trinidad and Tobago | -0.21 (-0.35, 0.07) | -0.26 (-0.42, 0.11) | -0.16 (-0.29, 0.02) | -4.12 (-4.70, 3.53) | -5.18 (-5.86, 4.49) | -3.58 (-4.14, 3.02) | -4.29 (-4.89, 3.69) | -5.41 (-6.07, 4.74) | -3.63 (-4.22, 3.05) |
| Tunisia | -0.22 (-0.34, 0.10) | -0.23 (-0.37, 0.08) | -0.22 (-0.33, 0.12) | 1.76 (1.45, 2.08) | 1.65 (1.29, 2.01) | 1.73 (1.45, 2.01) | 0.17 (-0.13, 0.46) | 0.05 (-0.31, 0.40) | 0.20 (-0.04, 0.44) |
| Turkey | -0.11 (-0.45, 0.24) | -0.10 (-0.46, 0.26) | -0.10 (-0.43, 0.23) | -2.53 (-2.68, 2.39) | -3.16 (-3.27, 3.05) | -2.12 (-2.34, 1.90) | -3.52 (-3.62, 3.42) | -3.97 (-4.09, 3.85) | -3.14 (-3.29, 2.98) |
| Turkmenistan | 0.02 (-0.07, 0.10) | 0.08 (-0.01, 0.17) | 0.00 (-0.08, 0.09) | 0.34 (0.07, 0.61) | 0.36 (0.03, 0.70) | 0.26 (0.05, 0.48) | 0.27 (-0.04, 0.58) | 0.34 (-0.05, 0.73) | 0.15 (-0.09, 0.38) |
| Tuvalu | 0.05 (-0.03, 0.13) | 0.06 (-0.03, 0.14) | 0.10 (0.01, 0.18) | -1.60 (-1.63, 1.57) | -1.87 (-1.89, 1.84) | -1.31 (-1.34, 1.27) | -1.72 (-1.76, 1.68) | -2.05 (-2.09, 2.01) | -1.34 (-1.39, 1.30) |
| Uganda | -0.49 (-0.76, 0.21) | -0.54 (-0.82, 0.26) | -0.47 (-0.74, 0.20) | -2.36 (-2.48, 2.24) | -2.84 (-2.98, 2.70) | -0.96 (-1.06, 0.86) | -2.51 (-2.66, 2.36) | -3.14 (-3.32, 2.96) | -1.07 (-1.19, 0.95) |
| Ukraine | 0.53 (0.30, 0.75) | 0.64 (0.41, 0.87) | 0.45 (0.24, 0.67) | 0.00 (-0.32, 0.33) | -0.26 (-0.68, 0.16) | 0.24 (0.03, 0.45) | 0.02 (-0.30, 0.34) | -0.22 (-0.65, 0.21) | 0.29 (0.07, 0.50) |
| United Arab Emirates | -0.17 (-0.33, 0.01) | -0.10 (-0.28, 0.07) | -0.11 (-0.26, 0.03) | 0.25 (-0.57, 1.07) | -2.95 (-3.48, 2.41) | 3.28 (2.50, 4.06) | -1.56 (-2.01, 1.11) | -3.83 (-4.13, 3.52) | 0.64 (0.18, 1.11) |
| United Kingdom | -0.31 (-0.41, 0.21) | -0.26 (-0.36, 0.16) | -0.37 (-0.47, 0.28) | -0.92 (-1.01, 0.84) | -1.26 (-1.37, 1.15) | -0.67 (-0.76, 0.57) | -1.53 (-1.64, 1.41) | -1.97 (-2.09, 1.85) | -1.19 (-1.32, 1.07) |
| United Republic of Tanzania | -0.76 (-0.86, 0.66) | -0.74 (-0.84, 0.63) | -0.78 (-0.88, 0.68) | -1.62 (-1.68, 1.57) | -2.24 (-2.34, 2.14) | -0.63 (-0.69, 0.57) | -1.57 (-1.65, 1.49) | -2.16 (-2.26, 2.06) | -0.62 (-0.72, 0.53) |
| United States of America | 0.32 (0.26, 0.39) | 0.30 (0.24, 0.37) | 0.34 (0.27, 0.41) | -0.10 (-0.21, 0.00) | -0.04 (-0.20, 0.12) | -0.13 (-0.23, 0.03) | -0.81 (-0.94, 0.69) | -0.67 (-0.82, 0.52) | -0.90 (-1.03, 0.76) |
| United States Virgin Islands | 0.18 (0.10, 0.27) | 0.15 (0.07, 0.23) | 0.22 (0.13, 0.30) | -3.14 (-3.45, 2.82) | -3.42 (-3.77, 3.08) | -2.79 (-3.07, 2.50) | -3.04 (-3.37, 2.70) | -3.32 (-3.69, 2.94) | -2.60 (-2.87, 2.34) |
| Uruguay | 0.59 (0.47, 0.71) | 0.65 (0.52, 0.79) | 0.55 (0.44, 0.65) | -1.41 (-1.52, 1.30) | -2.29 (-2.46, 2.13) | -1.15 (-1.26, 1.05) | -2.12 (-2.23, 2.02) | -3.20 (-3.36, 3.04) | -1.73 (-1.83, 1.63) |
| Uzbekistan | 0.09 (-0.07, 0.26) | 0.15 (-0.02, 0.32) | 0.08 (-0.08, 0.24) | -0.40 (-0.64, 0.17) | -0.32 (-0.65, 0.02) | -0.38 (-0.57, 0.19) | -0.93 (-1.16, 0.71) | -1.03 (-1.32, 0.75) | -0.80 (-0.99, 0.61) |
| Vanuatu | -0.01 (-0.09, 0.07) | -0.05 (-0.14, 0.03) | 0.00 (-0.09, 0.08) | -0.89 (-1.01, 0.77) | -1.19 (-1.33, 1.06) | -0.69 (-0.82, 0.57) | -0.80 (-0.92, 0.67) | -1.11 (-1.27, 0.96) | -0.55 (-0.68, 0.43) |
| Venezuela (Bolivarian Republic of) | -0.19 (-0.42, 0.03) | -0.27 (-0.52, 0.03) | -0.13 (-0.34, 0.08) | -4.16 (-4.73, 3.59) | -4.03 (-4.67, 3.38) | -4.29 (-4.81, 3.76) | -3.71 (-4.22, 3.19) | -3.68 (-4.23, 3.12) | -3.73 (-4.21, 3.24) |
| Viet Nam | -0.16 (-0.22, 0.09) | -0.09 (-0.14, 0.04) | -0.21 (-0.28, 0.14) | -0.82 (-0.87, 0.77) | -0.94 (-0.98, 0.90) | -0.77 (-0.83, 0.71) | -1.08 (-1.11, 1.06) | -1.20 (-1.26, 1.14) | -0.96 (-0.99, 0.94) |
| Yemen | -0.68 (-0.82, 0.54) | -0.66 (-0.81, 0.51) | -0.68 (-0.82, 0.55) | 1.61 (1.25, 1.96) | 1.39 (1.00, 1.77) | 1.82 (1.50, 2.15) | 1.04 (0.68, 1.41) | 0.77 (0.39, 1.15) | 1.37 (1.02, 1.72) |
| Zambia | 0.60 (0.48, 0.73) | 0.64 (0.52, 0.77) | 0.56 (0.43, 0.68) | 0.42 (0.21, 0.62) | 0.21 (0.06, 0.36) | 0.92 (0.58, 1.26) | 0.09 (-0.09, 0.27) | -0.33 (-0.47, 0.19) | 0.69 (0.36, 1.02) |
| Zimbabwe | -0.06 (-0.26, 0.13) | -0.09 (-0.28, 0.11) | -0.08 (-0.27, 0.11) | 0.94 (0.61, 1.27) | 0.89 (0.50, 1.29) | 1.40 (1.07, 1.72) | 1.45 (1.05, 1.86) | 1.34 (0.86, 1.82) | 1.97 (1.56, 2.38) |

ASIR, age-standardised incidence rate; ASMR, age-standardised mortality rate; ASDR, age-standardised DALY rate;; EAPC, estimated annual percentage change; CI, confidence interval; PAH, pulmonary arterial hypertension.
