# Supplementary material for: Global, regional, and national burden of pulmonary arterial hypertension, 1990–2021, with projections to 2045: a systematic analysis for the Global Burden of Disease Study 2021
Source: Research Square preprint supplement (doi:10.21203/rs.3.rs-6936502/v1), 2025-07-24
Supplement: Supplementary file 2 [file acd2e966247fb41982289968.docx]

**Table S1. Incidence, deaths, and DALYs for PAH in 204 countries in 2021**

|  | **Incidence/1000 (95% UI)** | | | **Deaths/1000 (95% UI)** | | | **DALYs/1000 (95% UI)** | | |
| --- | --- | --- | --- | --- | --- | --- | --- | --- | --- |
| **Location** | **Both** | **Male** | **Female** | **Both** | **Male** | **Female** | **Both** | **Male** | **Female** |
| Afghanistan | 115.16 (93.42, 139.37) | 49.59 (40.14, 60.52) | 65.57 (53.23, 78.62) | 125.41 (56.31, 188.57) | 82.10 (31.04, 135.60) | 43.31 (11.40, 78.29) | 8110.07 (3767.65, 12130.89) | 5650.37 (2302.48, 9225.64) | 2459.70 (647.47, 4562.11) |
| Albania | 17.91 (14.30, 22.21) | 8.49 (6.73, 10.48) | 9.42 (7.53, 11.79) | 11.03 (7.11, 19.33) | 4.02 (2.79, 6.17) | 7.01 (3.68, 14.96) | 286.53 (173.00, 512.06) | 99.63 (68.29, 158.08) | 186.90 (88.98, 409.03) |
| Algeria | 205.65 (165.00, 248.74) | 93.76 (74.48, 113.79) | 111.89 (89.71, 137.99) | 119.31 (42.52, 184.58) | 44.18 (13.46, 64.29) | 75.13 (29.18, 133.77) | 4334.96 (2024.22, 6496.23) | 1855.61 (694.50, 2590.07) | 2479.35 (1262.68, 4269.39) |
| American Samoa | 0.28 (0.22, 0.34) | 0.13 (0.10, 0.16) | 0.15 (0.12, 0.18) | 0.05 (0.03, 0.12) | 0.02 (0.01, 0.04) | 0.03 (0.02, 0.09) | 1.93 (1.12, 3.72) | 0.68 (0.40, 1.49) | 1.25 (0.65, 2.69) |
| Andorra | 0.50 (0.39, 0.62) | 0.25 (0.20, 0.31) | 0.25 (0.20, 0.32) | 0.17 (0.11, 0.27) | 0.06 (0.04, 0.09) | 0.11 (0.07, 0.20) | 4.14 (2.80, 5.90) | 1.47 (0.98, 2.02) | 2.67 (1.74, 4.09) |
| Angola | 183.37 (150.99, 220.66) | 76.99 (63.00, 93.06) | 106.38 (87.80, 127.98) | 30.49 (16.39, 57.06) | 16.30 (8.39, 26.98) | 14.19 (6.99, 34.38) | 1628.07 (975.69, 2923.79) | 915.58 (521.76, 1444.30) | 712.50 (382.71, 1658.64) |
| Antigua and Barbuda | 0.48 (0.39, 0.60) | 0.21 (0.17, 0.26) | 0.27 (0.22, 0.34) | 0.04 (0.03, 0.04) | 0.02 (0.02, 0.02) | 0.02 (0.02, 0.02) | 1.42 (1.30, 1.57) | 0.70 (0.62, 0.77) | 0.73 (0.65, 0.83) |
| Argentina | 167.81 (134.75, 206.40) | 76.36 (60.26, 93.92) | 91.45 (73.68, 111.68) | 108.46 (99.98, 117.73) | 34.62 (31.32, 38.32) | 73.84 (66.52, 81.09) | 3409.00 (3182.59, 3695.20) | 1125.69 (1029.70, 1233.71) | 2283.30 (2101.75, 2490.03) |
| Armenia | 15.52 (12.46, 19.39) | 6.38 (5.08, 7.93) | 9.15 (7.33, 11.49) | 3.18 (2.59, 3.79) | 1.63 (1.33, 1.95) | 1.54 (1.25, 1.87) | 80.70 (67.24, 94.18) | 45.26 (37.63, 53.10) | 35.44 (29.60, 41.45) |
| Australia | 125.40 (99.96, 155.64) | 58.59 (45.81, 73.25) | 66.80 (53.59, 83.79) | 50.10 (42.14, 56.89) | 16.17 (14.21, 18.43) | 33.93 (27.53, 39.37) | 1207.15 (1087.40, 1333.48) | 396.14 (353.91, 447.46) | 811.01 (720.84, 900.23) |
| Austria | 49.89 (39.76, 62.05) | 23.06 (18.44, 29.31) | 26.83 (21.47, 32.95) | 24.91 (21.77, 27.61) | 9.36 (8.25, 10.49) | 15.55 (13.07, 17.43) | 494.91 (449.81, 541.70) | 199.20 (180.93, 219.23) | 295.71 (264.25, 325.90) |
| Azerbaijan | 42.12 (33.81, 53.67) | 18.40 (14.57, 23.12) | 23.72 (18.98, 30.34) | 53.66 (32.46, 82.50) | 25.39 (15.20, 40.60) | 28.27 (12.94, 52.90) | 1871.05 (1077.75, 2999.05) | 932.15 (535.91, 1552.40) | 938.90 (388.42, 1872.04) |
| Bahamas | 2.07 (1.67, 2.52) | 0.88 (0.70, 1.08) | 1.19 (0.95, 1.47) | 1.58 (1.25, 1.98) | 0.59 (0.47, 0.74) | 0.99 (0.79, 1.24) | 59.03 (46.73, 74.97) | 22.43 (17.66, 28.33) | 36.60 (28.78, 46.34) |
| Bahrain | 6.30 (4.99, 7.88) | 3.75 (2.91, 4.78) | 2.55 (2.04, 3.19) | 1.08 (0.50, 2.05) | 0.45 (0.22, 0.69) | 0.63 (0.27, 1.63) | 48.22 (24.24, 82.98) | 23.06 (11.69, 35.39) | 25.16 (12.14, 61.87) |
| Bangladesh | 798.12 (644.24, 967.04) | 350.69 (283.65, 428.28) | 447.43 (362.96, 549.20) | 382.58 (189.27, 663.54) | 169.45 (72.00, 382.14) | 213.13 (99.00, 387.82) | 12634.18 (7166.87, 19513.79) | 4846.37 (2363.90, 8752.28) | 7787.81 (4096.03, 12788.68) |
| Barbados | 1.83 (1.46, 2.28) | 0.75 (0.60, 0.94) | 1.07 (0.85, 1.36) | 1.63 (1.31, 2.01) | 0.60 (0.46, 0.77) | 1.03 (0.82, 1.27) | 43.13 (34.29, 53.97) | 15.76 (12.30, 20.29) | 27.37 (21.66, 34.46) |
| Belarus | 50.64 (40.07, 63.10) | 19.89 (15.67, 24.94) | 30.75 (24.37, 39.19) | 5.76 (4.74, 6.89) | 2.39 (1.97, 2.85) | 3.37 (2.73, 4.04) | 185.48 (153.81, 219.53) | 80.82 (67.16, 95.06) | 104.66 (86.51, 125.61) |
| Belgium | 69.86 (55.98, 88.19) | 32.17 (25.52, 40.00) | 37.69 (30.23, 47.95) | 44.98 (37.75, 50.32) | 12.14 (10.81, 13.31) | 32.85 (26.80, 37.38) | 900.33 (801.35, 980.95) | 269.50 (246.66, 295.12) | 630.84 (555.19, 689.78) |
| Belize | 1.77 (1.45, 2.16) | 0.80 (0.64, 0.97) | 0.98 (0.79, 1.19) | 0.50 (0.44, 0.56) | 0.17 (0.14, 0.19) | 0.33 (0.29, 0.38) | 22.31 (19.51, 25.15) | 7.96 (6.82, 9.29) | 14.35 (12.52, 16.20) |
| Benin | 58.61 (48.46, 70.29) | 24.62 (20.33, 29.78) | 33.99 (28.17, 40.75) | 12.81 (6.69, 20.49) | 8.68 (4.40, 13.73) | 4.13 (1.94, 10.24) | 779.93 (486.85, 1192.33) | 549.57 (327.54, 847.73) | 230.35 (108.10, 482.92) |
| Bermuda | 0.41 (0.33, 0.53) | 0.18 (0.14, 0.22) | 0.24 (0.19, 0.30) | 0.74 (0.62, 0.91) | 0.37 (0.32, 0.46) | 0.37 (0.29, 0.46) | 15.59 (13.17, 18.87) | 8.18 (6.79, 9.90) | 7.41 (6.06, 9.25) |
| Bhutan | 4.62 (3.77, 5.51) | 2.11 (1.71, 2.55) | 2.51 (2.04, 3.05) | 1.81 (0.91, 2.96) | 0.79 (0.34, 1.53) | 1.02 (0.48, 1.73) | 61.13 (33.90, 96.76) | 27.90 (14.10, 47.86) | 33.23 (16.90, 56.00) |
| Bolivia (Plurinational State of) | 64.76 (52.35, 78.03) | 27.48 (22.14, 33.33) | 37.28 (30.03, 44.93) | 21.16 (14.84, 30.39) | 8.53 (5.74, 12.11) | 12.63 (7.99, 18.87) | 979.69 (707.60, 1392.20) | 426.17 (277.66, 603.62) | 553.52 (361.56, 824.05) |
| Bosnia and Herzegovina | 25.49 (20.38, 31.68) | 11.44 (9.14, 14.35) | 14.04 (11.14, 17.66) | 12.30 (8.89, 16.00) | 4.73 (3.19, 6.43) | 7.58 (4.90, 10.55) | 295.12 (212.39, 381.15) | 113.11 (78.63, 152.66) | 182.01 (114.95, 254.31) |
| Botswana | 18.66 (15.20, 22.59) | 8.13 (6.50, 9.83) | 10.53 (8.67, 12.81) | 1.79 (1.23, 2.43) | 0.99 (0.68, 1.39) | 0.80 (0.49, 1.18) | 85.68 (59.61, 114.39) | 46.41 (32.16, 64.38) | 39.27 (23.94, 57.60) |
| Brazil | 1197.97 (961.40, 1459.41) | 530.44 (422.43, 650.59) | 667.52 (539.00, 818.32) | 775.14 (709.73, 818.47) | 269.97 (252.28, 287.05) | 505.16 (452.62, 540.67) | 24078.22 (22849.84, 25249.19) | 8795.77 (8247.70, 9374.75) | 15282.44 (14317.27, 16081.34) |
| Brunei Darussalam | 1.42 (1.14, 1.79) | 0.71 (0.57, 0.90) | 0.71 (0.56, 0.89) | 0.95 (0.60, 1.19) | 0.17 (0.13, 0.23) | 0.78 (0.43, 1.01) | 45.45 (26.80, 58.34) | 10.17 (7.58, 13.61) | 35.28 (15.55, 45.56) |
| Bulgaria | 47.87 (38.17, 60.00) | 20.98 (16.76, 26.01) | 26.90 (21.39, 33.96) | 11.42 (8.47, 14.98) | 3.94 (2.93, 5.20) | 7.47 (5.60, 9.84) | 285.98 (216.79, 375.62) | 101.30 (76.56, 133.61) | 184.68 (141.06, 241.86) |
| Burkina Faso | 93.17 (76.44, 111.74) | 38.46 (31.26, 46.66) | 54.72 (45.11, 65.60) | 35.96 (17.27, 59.45) | 24.51 (10.54, 45.15) | 11.45 (4.95, 30.36) | 1991.59 (1161.79, 3180.60) | 1403.81 (754.86, 2360.51) | 587.78 (250.88, 1361.25) |
| Burundi | 75.64 (62.10, 92.19) | 33.89 (27.87, 40.88) | 41.76 (34.23, 51.17) | 15.92 (6.39, 31.86) | 9.63 (3.30, 19.70) | 6.28 (2.41, 21.24) | 916.19 (413.87, 1813.47) | 545.02 (216.00, 1032.65) | 371.17 (151.75, 1178.50) |
| Cabo Verde | 2.66 (2.15, 3.27) | 1.17 (0.93, 1.46) | 1.48 (1.20, 1.82) | 0.59 (0.22, 1.10) | 0.30 (0.13, 0.57) | 0.29 (0.08, 0.70) | 22.38 (8.83, 41.02) | 11.35 (4.92, 21.30) | 11.03 (3.53, 27.28) |
| Cambodia | 89.83 (72.70, 109.76) | 39.31 (31.83, 48.28) | 50.52 (40.66, 61.02) | 16.81 (10.07, 38.10) | 6.18 (3.62, 14.41) | 10.63 (5.81, 29.67) | 776.58 (499.93, 1512.88) | 303.66 (184.63, 678.51) | 472.92 (272.22, 1106.47) |
| Cameroon | 160.86 (131.32, 196.70) | 68.24 (55.67, 83.35) | 92.62 (75.68, 113.11) | 31.63 (19.03, 53.48) | 18.79 (10.65, 31.75) | 12.83 (7.04, 27.11) | 1814.22 (1238.00, 2862.20) | 1110.42 (730.00, 1741.00) | 703.80 (405.22, 1367.55) |
| Canada | 137.56 (109.40, 170.88) | 64.45 (51.41, 81.55) | 73.11 (57.79, 90.96) | 94.55 (82.70, 103.85) | 29.39 (26.26, 32.60) | 65.16 (55.25, 73.00) | 2170.58 (1981.56, 2336.85) | 730.98 (663.29, 802.70) | 1439.60 (1304.23, 1572.60) |
| Central African Republic | 32.81 (26.86, 39.90) | 14.09 (11.52, 17.13) | 18.71 (15.29, 22.85) | 7.73 (3.82, 13.81) | 4.85 (2.16, 8.49) | 2.88 (1.20, 7.35) | 429.11 (231.83, 780.06) | 279.43 (138.94, 471.03) | 149.68 (61.03, 349.99) |
| Chad | 67.56 (54.86, 81.86) | 29.22 (23.64, 35.17) | 38.34 (31.14, 46.66) | 27.39 (14.59, 48.71) | 18.99 (9.24, 35.22) | 8.40 (2.68, 22.36) | 1766.39 (980.12, 3155.62) | 1268.21 (612.80, 2258.44) | 498.19 (163.60, 1305.73) |
| Chile | 77.66 (62.31, 97.36) | 35.79 (28.31, 44.42) | 41.86 (33.95, 53.02) | 33.65 (30.42, 36.58) | 9.58 (8.67, 10.60) | 24.07 (21.41, 26.33) | 1111.86 (1027.58, 1201.12) | 331.22 (301.52, 363.65) | 780.65 (709.63, 852.11) |
| China | 9257.24 (7349.72, 11507.74) | 4568.97 (3611.35, 5721.01) | 4688.27 (3732.05, 5864.27) | 7317.95 (4835.72, 9075.75) | 3682.53 (2327.45, 4754.29) | 3635.43 (2240.14, 4821.16) | 150940.71 (99583.31, 186503.40) | 75517.87 (48308.12, 98062.18) | 75422.84 (47178.85, 104591.34) |
| Colombia | 243.87 (197.54, 297.70) | 103.98 (84.64, 127.07) | 139.89 (112.14, 171.12) | 51.87 (42.97, 62.50) | 17.99 (14.75, 22.04) | 33.88 (27.83, 40.86) | 1644.89 (1380.16, 1948.75) | 583.72 (483.06, 714.32) | 1061.17 (882.87, 1269.54) |
| Comoros | 5.24 (4.26, 6.25) | 2.24 (1.83, 2.73) | 3.00 (2.41, 3.59) | 0.84 (0.41, 1.65) | 0.42 (0.20, 0.83) | 0.42 (0.20, 1.06) | 41.28 (22.71, 80.71) | 20.73 (11.10, 39.67) | 20.55 (10.69, 50.22) |
| Congo | 30.13 (24.44, 36.73) | 13.15 (10.68, 16.00) | 16.98 (13.71, 20.72) | 4.45 (2.62, 8.34) | 2.18 (1.22, 3.79) | 2.26 (1.32, 4.90) | 205.55 (130.67, 368.56) | 103.37 (62.57, 177.15) | 102.17 (61.62, 209.55) |
| Cook Islands | 0.12 (0.10, 0.15) | 0.05 (0.04, 0.07) | 0.07 (0.05, 0.08) | 0.03 (0.02, 0.07) | 0.01 (0.01, 0.02) | 0.02 (0.01, 0.06) | 0.94 (0.58, 1.98) | 0.29 (0.19, 0.57) | 0.65 (0.35, 1.50) |
| Costa Rica | 23.14 (18.60, 28.60) | 9.82 (7.83, 12.08) | 13.32 (10.70, 16.51) | 5.61 (4.85, 6.30) | 2.43 (2.08, 2.79) | 3.18 (2.69, 3.66) | 163.56 (145.04, 182.93) | 71.31 (61.14, 81.35) | 92.25 (81.62, 102.78) |
| Coted'Ivoire | 138.78 (113.00, 169.23) | 63.02 (50.33, 77.14) | 75.76 (62.54, 93.70) | 30.73 (15.98, 49.62) | 20.04 (9.49, 33.13) | 10.70 (5.35, 22.59) | 1818.26 (1113.87, 2742.29) | 1214.92 (668.69, 1906.36) | 603.33 (320.30, 1164.26) |
| Croatia | 30.17 (24.49, 37.14) | 13.39 (10.59, 16.83) | 16.78 (13.63, 21.06) | 4.02 (3.34, 4.81) | 1.33 (1.09, 1.60) | 2.69 (2.23, 3.21) | 92.27 (78.16, 108.44) | 32.95 (27.49, 38.90) | 59.32 (49.95, 70.80) |
| Cuba | 67.31 (53.87, 84.47) | 28.91 (23.05, 36.14) | 38.40 (30.56, 49.29) | 8.64 (7.53, 9.86) | 3.02 (2.55, 3.57) | 5.62 (4.76, 6.56) | 265.03 (227.52, 300.90) | 93.87 (80.86, 107.99) | 171.16 (146.43, 198.07) |
| Cyprus | 7.04 (5.66, 8.64) | 3.25 (2.58, 4.03) | 3.80 (3.04, 4.67) | 14.55 (7.31, 18.60) | 5.26 (3.64, 6.87) | 9.29 (2.52, 12.57) | 304.62 (165.54, 379.34) | 116.04 (80.75, 150.61) | 188.59 (60.40, 250.39) |
| Czechia | 73.96 (60.56, 92.09) | 33.55 (27.25, 42.61) | 40.41 (32.70, 50.12) | 88.46 (75.73, 101.06) | 36.76 (30.92, 42.33) | 51.70 (42.76, 60.60) | 1898.89 (1608.40, 2169.62) | 823.23 (691.19, 951.90) | 1075.66 (889.86, 1284.40) |
| Democratic People's Republic of Korea | 158.86 (127.15, 196.08) | 69.61 (54.84, 87.09) | 89.25 (71.46, 109.17) | 95.21 (66.92, 160.09) | 30.58 (19.86, 45.53) | 64.64 (42.17, 124.32) | 2284.97 (1613.35, 3818.22) | 826.42 (551.23, 1239.18) | 1458.55 (948.56, 2856.79) |
| Democratic Republic of the Congo | 511.28 (419.60, 619.11) | 224.83 (184.07, 274.00) | 286.45 (233.99, 345.70) | 86.26 (36.21, 160.62) | 46.64 (17.94, 82.59) | 39.62 (16.67, 99.63) | 4157.99 (2013.45, 7024.16) | 2371.90 (1071.78, 3954.77) | 1786.09 (835.39, 3954.41) |
| Denmark | 33.20 (26.57, 41.91) | 15.87 (12.59, 19.83) | 17.33 (13.85, 21.98) | 20.96 (18.02, 23.13) | 9.54 (8.36, 10.63) | 11.42 (9.53, 12.96) | 425.87 (384.37, 462.44) | 195.66 (174.79, 214.93) | 230.21 (204.06, 253.48) |
| Djibouti | 7.81 (6.38, 9.43) | 3.75 (3.08, 4.58) | 4.05 (3.30, 4.88) | 1.20 (0.54, 2.33) | 0.73 (0.32, 1.44) | 0.47 (0.20, 1.21) | 62.60 (30.49, 119.10) | 37.95 (17.80, 73.63) | 24.66 (11.76, 60.92) |
| Dominica | 0.36 (0.29, 0.45) | 0.16 (0.13, 0.21) | 0.20 (0.16, 0.25) | 0.07 (0.05, 0.17) | 0.02 (0.01, 0.03) | 0.05 (0.03, 0.15) | 2.26 (1.65, 3.82) | 0.71 (0.51, 1.02) | 1.54 (1.07, 3.12) |
| Dominican Republic | 56.11 (45.38, 68.09) | 25.03 (20.37, 30.32) | 31.08 (25.10, 37.51) | 8.76 (5.98, 23.26) | 3.58 (2.48, 5.60) | 5.18 (3.12, 18.64) | 456.34 (329.64, 831.99) | 209.47 (145.56, 350.40) | 246.87 (161.36, 588.39) |
| Ecuador | 89.44 (72.79, 108.15) | 38.91 (31.41, 47.42) | 50.53 (41.24, 61.48) | 27.30 (22.91, 32.30) | 10.83 (8.92, 13.15) | 16.46 (13.63, 19.79) | 957.09 (811.86, 1115.64) | 393.25 (323.53, 466.28) | 563.84 (472.81, 663.45) |
| Egypt | 453.65 (366.01, 559.01) | 216.70 (174.11, 267.33) | 236.95 (189.58, 291.41) | 282.17 (220.48, 376.81) | 146.88 (110.77, 192.41) | 135.28 (95.58, 214.43) | 17675.58 (13635.22, 23380.86) | 9843.01 (7089.93, 13494.53) | 7832.57 (5382.81, 11413.13) |
| El Salvador | 27.47 (22.49, 33.42) | 11.04 (9.05, 13.44) | 16.43 (13.31, 20.21) | 7.74 (5.29, 15.88) | 2.44 (1.73, 4.02) | 5.30 (3.35, 12.36) | 262.84 (190.20, 440.54) | 89.81 (66.61, 139.54) | 173.03 (118.70, 321.90) |
| Equatorial Guinea | 7.46 (6.09, 9.16) | 3.36 (2.74, 4.19) | 4.09 (3.35, 5.07) | 0.81 (0.44, 1.44) | 0.42 (0.21, 0.77) | 0.39 (0.17, 0.73) | 43.17 (24.27, 74.66) | 23.75 (12.94, 40.90) | 19.41 (9.05, 37.75) |
| Eritrea | 40.56 (33.10, 49.16) | 17.73 (14.37, 21.87) | 22.82 (18.66, 27.43) | 8.50 (3.97, 16.23) | 4.66 (2.03, 8.68) | 3.84 (1.73, 10.69) | 469.80 (239.30, 930.61) | 267.87 (128.65, 530.81) | 201.93 (97.35, 542.69) |
| Estonia | 7.40 (5.95, 9.15) | 2.90 (2.30, 3.64) | 4.49 (3.60, 5.64) | 1.12 (0.92, 1.31) | 0.33 (0.27, 0.39) | 0.80 (0.64, 0.94) | 24.37 (20.88, 28.38) | 8.39 (7.09, 10.14) | 15.97 (13.32, 18.73) |
| Eswatini | 6.78 (5.52, 8.22) | 2.84 (2.28, 3.49) | 3.95 (3.20, 4.76) | 1.04 (0.68, 1.45) | 0.63 (0.43, 0.86) | 0.41 (0.23, 0.62) | 52.91 (35.42, 73.28) | 31.57 (21.44, 43.14) | 21.33 (12.67, 33.00) |
| Ethiopia | 754.85 (620.38, 903.34) | 333.14 (272.93, 399.56) | 421.72 (348.03, 509.13) | 97.35 (38.22, 203.37) | 52.86 (19.07, 105.31) | 44.50 (17.67, 144.66) | 5398.47 (2500.38, 11568.87) | 2831.45 (1241.68, 5285.34) | 2567.02 (1141.46, 7741.75) |
| Fiji | 5.87 (4.67, 7.10) | 2.62 (2.12, 3.16) | 3.24 (2.58, 3.94) | 1.01 (0.54, 2.06) | 0.37 (0.19, 0.81) | 0.64 (0.33, 1.46) | 43.77 (24.64, 83.14) | 16.64 (9.00, 36.31) | 27.13 (14.20, 57.53) |
| Finland | 33.60 (27.14, 42.39) | 15.89 (12.70, 20.05) | 17.72 (14.06, 22.38) | 7.73 (6.54, 8.72) | 2.01 (1.77, 2.28) | 5.72 (4.70, 6.58) | 177.96 (159.65, 198.45) | 52.47 (46.91, 59.72) | 125.49 (110.68, 141.04) |
| France | 440.26 (357.56, 547.35) | 202.72 (161.31, 252.56) | 237.55 (190.81, 296.55) | 325.05 (279.45, 361.07) | 113.42 (100.35, 126.20) | 211.63 (173.59, 241.72) | 6113.49 (5521.05, 6689.37) | 2387.76 (2192.83, 2619.51) | 3725.73 (3241.52, 4150.66) |
| Gabon | 10.80 (8.79, 13.06) | 4.70 (3.84, 5.66) | 6.10 (4.93, 7.43) | 1.45 (0.77, 2.58) | 0.77 (0.40, 1.69) | 0.68 (0.32, 1.29) | 60.12 (34.00, 104.16) | 32.79 (18.83, 67.58) | 27.33 (14.08, 48.65) |
| Gambia | 10.99 (9.04, 13.26) | 4.67 (3.82, 5.69) | 6.32 (5.19, 7.68) | 2.57 (1.17, 4.68) | 1.52 (0.65, 3.02) | 1.05 (0.49, 2.53) | 134.09 (70.03, 241.32) | 80.61 (39.87, 146.10) | 53.48 (27.45, 121.94) |
| Georgia | 19.81 (15.97, 24.74) | 7.97 (6.34, 9.96) | 11.84 (9.45, 14.83) | 58.04 (45.46, 72.63) | 26.64 (20.86, 33.67) | 31.40 (24.32, 39.07) | 1317.70 (1039.20, 1665.07) | 706.65 (554.41, 897.26) | 611.05 (477.94, 764.36) |
| Germany | 475.91 (384.75, 597.52) | 228.19 (182.97, 289.36) | 247.72 (198.61, 308.99) | 543.72 (452.64, 604.01) | 186.35 (165.88, 206.93) | 357.36 (285.51, 407.50) | 9440.98 (8306.11, 10352.48) | 3553.60 (3231.20, 3879.99) | 5887.38 (5009.81, 6573.64) |
| Ghana | 168.73 (138.21, 205.65) | 67.86 (55.16, 83.91) | 100.87 (82.28, 121.89) | 25.94 (14.16, 44.39) | 14.05 (7.97, 23.94) | 11.89 (5.59, 25.39) | 1256.20 (806.24, 2061.56) | 701.92 (452.18, 1175.96) | 554.28 (306.22, 1094.53) |
| Greece | 65.20 (52.55, 80.40) | 30.30 (24.10, 37.84) | 34.91 (28.28, 43.41) | 87.19 (75.86, 97.73) | 23.88 (20.87, 26.94) | 63.31 (53.59, 72.33) | 1495.12 (1339.78, 1644.78) | 466.37 (418.41, 517.73) | 1028.75 (904.28, 1148.26) |
| Greenland | 0.22 (0.17, 0.28) | 0.11 (0.09, 0.14) | 0.11 (0.08, 0.14) | 0.10 (0.08, 0.16) | 0.03 (0.02, 0.05) | 0.07 (0.05, 0.12) | 3.78 (2.78, 5.57) | 1.01 (0.67, 1.53) | 2.78 (1.94, 4.48) |
| Grenada | 0.56 (0.45, 0.70) | 0.25 (0.20, 0.31) | 0.31 (0.25, 0.38) | 0.27 (0.23, 0.31) | 0.14 (0.12, 0.17) | 0.13 (0.11, 0.15) | 9.28 (8.01, 10.66) | 5.04 (4.32, 5.83) | 4.24 (3.58, 4.99) |
| Guam | 1.04 (0.83, 1.28) | 0.47 (0.37, 0.60) | 0.57 (0.45, 0.70) | 0.10 (0.05, 0.22) | 0.04 (0.02, 0.09) | 0.06 (0.03, 0.16) | 4.21 (2.27, 8.18) | 1.69 (0.90, 3.88) | 2.51 (1.22, 5.94) |
| Guatemala | 71.68 (58.17, 87.22) | 30.51 (24.90, 37.19) | 41.17 (33.34, 50.33) | 6.66 (5.66, 7.77) | 2.39 (1.99, 2.90) | 4.27 (3.62, 5.04) | 324.33 (275.50, 385.54) | 123.36 (101.55, 151.74) | 200.96 (170.87, 240.79) |
| Guinea | 57.86 (47.75, 69.92) | 23.64 (19.24, 28.21) | 34.22 (28.09, 42.14) | 18.55 (9.16, 32.09) | 11.74 (5.30, 21.08) | 6.81 (3.02, 16.37) | 1089.58 (641.51, 1802.89) | 715.49 (385.33, 1190.00) | 374.10 (166.04, 817.61) |
| Guinea-Bissau | 8.84 (7.21, 10.81) | 3.65 (2.98, 4.49) | 5.18 (4.24, 6.34) | 2.67 (1.33, 4.67) | 1.59 (0.72, 2.87) | 1.07 (0.48, 2.79) | 152.94 (84.96, 260.81) | 93.71 (48.02, 160.41) | 59.23 (27.86, 147.85) |
| Guyana | 3.76 (2.99, 4.61) | 1.63 (1.30, 2.01) | 2.12 (1.69, 2.62) | 2.67 (2.05, 3.46) | 0.72 (0.54, 0.94) | 1.95 (1.48, 2.54) | 119.10 (90.63, 157.23) | 34.57 (26.07, 45.34) | 84.53 (63.33, 111.62) |
| Haiti | 56.18 (45.75, 68.81) | 22.95 (18.57, 28.38) | 33.23 (27.05, 40.33) | 53.33 (26.63, 86.85) | 28.79 (13.29, 43.29) | 24.54 (10.94, 50.64) | 3454.06 (1446.46, 6073.08) | 2005.75 (689.01, 3311.54) | 1448.30 (598.30, 3319.43) |
| Honduras | 41.58 (33.82, 50.45) | 17.04 (13.84, 20.60) | 24.53 (20.01, 30.32) | 11.73 (7.75, 18.46) | 4.21 (2.73, 6.06) | 7.52 (4.29, 13.37) | 408.61 (282.58, 617.02) | 148.35 (100.05, 226.84) | 260.26 (158.92, 446.28) |
| Hungary | 70.02 (56.48, 88.08) | 30.01 (23.74, 37.64) | 40.01 (32.04, 50.81) | 30.76 (25.05, 38.32) | 10.39 (8.59, 12.80) | 20.37 (16.22, 25.21) | 725.02 (590.13, 907.97) | 257.35 (212.89, 320.68) | 467.68 (376.37, 581.66) |
| Iceland | 1.66 (1.33, 2.05) | 0.79 (0.63, 0.95) | 0.87 (0.70, 1.09) | 0.75 (0.62, 0.87) | 0.13 (0.11, 0.15) | 0.62 (0.51, 0.72) | 17.01 (14.92, 19.11) | 3.52 (3.09, 3.94) | 13.49 (11.75, 15.21) |
| India | 7511.58 (6045.80, 9058.82) | 3332.88 (2681.09, 4029.20) | 4178.71 (3379.34, 5018.29) | 2611.57 (1738.58, 4059.81) | 1148.01 (725.92, 2107.47) | 1463.56 (787.75, 2289.60) | 94736.65 (69016.87, 131902.05) | 43120.05 (30461.04, 67697.70) | 51616.60 (29641.94, 72282.04) |
| Indonesia | 1683.59 (1350.45, 2054.21) | 841.85 (674.21, 1029.48) | 841.74 (674.67, 1023.89) | 267.71 (170.28, 672.39) | 95.07 (60.89, 202.32) | 172.64 (99.15, 479.56) | 11946.70 (7868.41, 24908.03) | 4434.94 (2957.51, 10378.43) | 7511.76 (4588.91, 17411.91) |
| Iran (Islamic Republic of) | 392.61 (316.80, 482.48) | 181.13 (146.16, 222.15) | 211.48 (170.23, 260.18) | 428.63 (285.60, 493.98) | 180.50 (125.91, 209.10) | 248.13 (144.76, 297.65) | 12800.80 (9989.32, 14671.86) | 6142.82 (4445.50, 7011.92) | 6657.97 (4611.16, 8144.99) |
| Iraq | 186.77 (152.15, 227.92) | 88.10 (71.19, 107.11) | 98.67 (80.42, 121.28) | 37.56 (19.83, 79.91) | 13.52 (7.09, 19.39) | 24.04 (11.51, 64.97) | 1821.98 (992.54, 3157.54) | 725.69 (390.41, 1047.73) | 1096.28 (530.70, 2365.84) |
| Ireland | 11.55 (9.02, 14.58) | 5.47 (4.28, 6.90) | 6.08 (4.74, 7.70) | 8.40 (7.20, 9.47) | 3.16 (2.77, 3.58) | 5.25 (4.40, 6.09) | 189.66 (171.64, 208.93) | 73.31 (65.43, 82.07) | 116.35 (102.56, 130.68) |
| Israel | 68.52 (56.27, 83.63) | 33.47 (27.55, 41.20) | 35.05 (28.44, 42.48) | 34.94 (29.87, 39.32) | 10.82 (9.35, 12.39) | 24.13 (19.88, 27.45) | 795.58 (718.73, 869.32) | 270.60 (241.60, 301.60) | 524.98 (463.20, 580.98) |
| Italy | 388.34 (313.31, 481.82) | 179.64 (143.17, 222.83) | 208.69 (168.79, 261.74) | 137.91 (115.44, 152.51) | 46.48 (41.57, 50.59) | 91.42 (74.48, 103.26) | 2779.45 (2503.88, 3032.67) | 981.00 (900.75, 1072.12) | 1798.45 (1585.63, 1985.45) |
| Jamaica | 12.41 (9.89, 15.25) | 5.30 (4.24, 6.61) | 7.11 (5.70, 8.70) | 2.11 (1.65, 2.72) | 0.59 (0.44, 0.78) | 1.52 (1.15, 1.92) | 78.11 (60.29, 100.39) | 22.68 (17.21, 29.34) | 55.43 (42.21, 70.47) |
| Japan | 693.81 (560.93, 866.45) | 338.45 (272.28, 423.82) | 355.36 (288.24, 444.91) | 1002.43 (785.83, 1147.27) | 321.27 (282.77, 354.85) | 681.16 (504.60, 801.91) | 18489.96 (16064.33, 20369.62) | 6836.75 (6300.09, 7511.79) | 11653.20 (9762.09, 13160.07) |
| Jordan | 48.92 (39.51, 60.21) | 23.64 (18.95, 29.06) | 25.28 (20.58, 31.13) | 4.35 (1.91, 14.18) | 1.72 (0.80, 2.24) | 2.63 (1.01, 12.45) | 253.26 (124.39, 686.32) | 113.58 (57.86, 159.95) | 139.68 (60.03, 567.59) |
| Kazakhstan | 83.86 (67.16, 104.48) | 35.72 (28.13, 44.88) | 48.14 (38.63, 59.97) | 7.48 (6.09, 9.04) | 3.11 (2.49, 3.79) | 4.37 (3.45, 5.37) | 268.02 (220.16, 315.99) | 118.71 (95.98, 144.37) | 149.31 (120.81, 178.14) |
| Kenya | 307.95 (251.27, 369.05) | 131.81 (106.94, 158.69) | 176.14 (143.94, 212.04) | 32.91 (14.34, 65.25) | 16.04 (7.36, 32.96) | 16.87 (6.58, 42.95) | 1654.78 (819.90, 3203.83) | 808.67 (415.53, 1537.73) | 846.11 (382.27, 2081.64) |
| Kiribati | 0.64 (0.52, 0.78) | 0.27 (0.22, 0.33) | 0.36 (0.29, 0.44) | 0.18 (0.10, 0.36) | 0.07 (0.04, 0.14) | 0.11 (0.06, 0.27) | 8.31 (4.89, 16.07) | 3.45 (1.79, 6.79) | 4.86 (2.63, 10.72) |
| Kuwait | 18.97 (14.95, 24.01) | 9.65 (7.55, 12.39) | 9.32 (7.41, 11.73) | 3.95 (3.36, 4.65) | 2.41 (1.99, 2.93) | 1.54 (1.33, 1.80) | 206.86 (174.05, 243.43) | 128.06 (104.29, 154.91) | 78.80 (67.70, 91.13) |
| Kyrgyzstan | 22.74 (18.32, 27.81) | 9.84 (7.87, 12.11) | 12.90 (10.46, 15.73) | 2.41 (1.95, 2.96) | 1.01 (0.81, 1.26) | 1.40 (1.11, 1.73) | 105.35 (86.13, 130.93) | 46.52 (37.91, 57.90) | 58.83 (47.39, 73.53) |
| Lao People's Democratic Republic | 42.64 (34.58, 51.05) | 19.92 (15.83, 24.02) | 22.72 (18.53, 27.18) | 8.76 (4.79, 20.04) | 3.61 (2.04, 8.36) | 5.15 (2.26, 12.88) | 479.37 (256.03, 980.48) | 209.70 (111.91, 490.98) | 269.67 (119.21, 640.57) |
| Latvia | 9.87 (7.90, 12.29) | 3.73 (2.96, 4.74) | 6.14 (4.89, 7.72) | 4.18 (3.54, 4.81) | 1.52 (1.26, 1.80) | 2.66 (2.24, 3.05) | 89.06 (76.70, 101.80) | 36.98 (30.61, 43.41) | 52.07 (45.24, 59.41) |
| Lebanon | 27.22 (21.95, 32.94) | 11.85 (9.55, 14.32) | 15.36 (12.38, 18.78) | 23.43 (17.49, 38.10) | 6.25 (4.74, 10.04) | 17.18 (12.20, 30.85) | 617.44 (485.42, 814.01) | 191.45 (149.74, 254.56) | 425.99 (319.09, 605.47) |
| Lesotho | 11.45 (9.28, 13.69) | 4.72 (3.81, 5.77) | 6.73 (5.46, 8.04) | 1.90 (1.28, 2.56) | 1.11 (0.70, 1.52) | 0.79 (0.44, 1.19) | 87.02 (58.84, 115.73) | 50.84 (32.32, 70.20) | 36.18 (20.82, 54.22) |
| Liberia | 28.01 (22.92, 34.37) | 12.23 (9.91, 14.92) | 15.77 (12.91, 19.45) | 5.94 (2.59, 10.70) | 3.64 (1.36, 7.08) | 2.30 (1.05, 5.10) | 339.24 (172.73, 574.71) | 213.50 (96.52, 363.97) | 125.74 (58.46, 264.85) |
| Libya | 35.40 (28.33, 43.98) | 16.54 (13.22, 20.96) | 18.86 (15.11, 23.53) | 17.83 (8.05, 31.21) | 8.70 (2.98, 15.04) | 9.13 (3.90, 17.80) | 1003.58 (437.20, 1781.92) | 563.65 (190.85, 991.04) | 439.93 (196.14, 874.35) |
| Lithuania | 15.09 (12.16, 18.92) | 5.78 (4.61, 7.29) | 9.30 (7.48, 11.68) | 4.50 (3.83, 5.18) | 1.85 (1.55, 2.19) | 2.65 (2.20, 3.07) | 99.58 (87.33, 113.49) | 45.63 (39.19, 53.63) | 53.96 (46.74, 62.16) |
| Luxembourg | 3.25 (2.61, 4.06) | 1.54 (1.22, 1.94) | 1.71 (1.36, 2.12) | 2.31 (1.97, 2.60) | 0.59 (0.52, 0.67) | 1.72 (1.43, 1.97) | 45.55 (40.54, 50.81) | 12.90 (11.48, 14.59) | 32.64 (28.65, 36.90) |
| Madagascar | 171.67 (139.89, 206.94) | 72.85 (59.10, 87.53) | 98.82 (80.62, 120.25) | 58.23 (30.96, 112.10) | 32.86 (16.86, 59.56) | 25.37 (11.80, 70.84) | 3453.94 (1961.40, 6744.70) | 1988.10 (1093.53, 3450.21) | 1465.84 (700.01, 4048.29) |
| Malawi | 120.32 (98.76, 146.29) | 49.98 (40.95, 60.88) | 70.35 (57.60, 85.15) | 18.71 (9.07, 33.13) | 11.31 (5.28, 20.92) | 7.39 (3.10, 21.04) | 1045.55 (545.99, 1827.17) | 634.71 (322.93, 1098.75) | 410.84 (181.44, 1086.33) |
| Malaysia | 148.98 (118.89, 182.76) | 73.38 (58.23, 89.55) | 75.60 (60.79, 93.30) | 19.15 (11.46, 64.87) | 5.90 (3.77, 6.98) | 13.24 (7.03, 57.70) | 757.20 (518.62, 1870.73) | 247.67 (179.00, 301.48) | 509.53 (315.84, 1597.82) |
| Maldives | 2.35 (1.87, 2.95) | 1.33 (1.05, 1.69) | 1.01 (0.81, 1.25) | 0.75 (0.57, 1.14) | 0.45 (0.34, 0.80) | 0.30 (0.21, 0.50) | 33.70 (26.57, 49.80) | 21.17 (16.07, 33.10) | 12.53 (9.07, 19.28) |
| Mali | 96.46 (79.32, 114.92) | 40.38 (33.16, 48.61) | 56.08 (45.93, 67.89) | 27.38 (12.76, 52.77) | 15.31 (6.39, 29.54) | 12.07 (4.73, 33.61) | 1667.08 (917.76, 2937.56) | 978.62 (493.29, 1668.42) | 688.46 (278.86, 1759.59) |
| Malta | 2.53 (2.01, 3.17) | 1.20 (0.95, 1.53) | 1.34 (1.06, 1.67) | 0.77 (0.66, 0.87) | 0.17 (0.15, 0.19) | 0.61 (0.50, 0.69) | 18.15 (16.19, 20.21) | 4.80 (4.19, 5.52) | 13.35 (11.68, 14.93) |
| Marshall Islands | 0.29 (0.23, 0.35) | 0.13 (0.11, 0.16) | 0.15 (0.12, 0.19) | 0.08 (0.05, 0.17) | 0.03 (0.02, 0.07) | 0.05 (0.03, 0.12) | 3.94 (2.27, 7.49) | 1.49 (0.79, 3.05) | 2.44 (1.32, 5.08) |
| Mauritania | 17.74 (14.52, 21.46) | 7.31 (5.93, 8.90) | 10.43 (8.52, 12.65) | 3.71 (1.76, 6.89) | 1.94 (0.86, 4.07) | 1.76 (0.83, 3.76) | 176.76 (101.28, 300.06) | 95.42 (49.69, 174.07) | 81.34 (43.62, 166.82) |
| Mauritius | 11.92 (9.57, 14.77) | 5.59 (4.41, 6.97) | 6.34 (5.03, 7.86) | 11.01 (9.78, 11.99) | 3.77 (3.38, 4.15) | 7.24 (6.36, 7.98) | 398.21 (351.08, 433.75) | 139.76 (123.99, 152.92) | 258.45 (225.65, 286.22) |
| Mexico | 661.44 (535.67, 802.62) | 289.62 (233.72, 351.69) | 371.82 (300.52, 451.24) | 100.75 (88.65, 112.26) | 33.92 (28.99, 39.02) | 66.83 (57.08, 75.90) | 3758.61 (3349.29, 4225.82) | 1353.95 (1184.03, 1548.98) | 2404.66 (2085.20, 2752.16) |
| Micronesia (Federated States of) | 0.58 (0.46, 0.71) | 0.26 (0.21, 0.33) | 0.31 (0.25, 0.38) | 0.16 (0.10, 0.33) | 0.06 (0.03, 0.12) | 0.10 (0.06, 0.24) | 6.57 (4.01, 12.52) | 2.46 (1.45, 5.00) | 4.11 (2.39, 8.98) |
| Monaco | 0.25 (0.20, 0.32) | 0.12 (0.09, 0.15) | 0.14 (0.11, 0.17) | 0.14 (0.09, 0.21) | 0.05 (0.04, 0.07) | 0.09 (0.05, 0.16) | 2.79 (1.90, 3.85) | 1.10 (0.76, 1.46) | 1.69 (1.04, 2.65) |
| Mongolia | 13.85 (11.08, 17.14) | 6.01 (4.80, 7.41) | 7.83 (6.27, 9.73) | 34.25 (19.88, 43.98) | 18.70 (10.99, 25.88) | 15.55 (3.42, 21.96) | 1230.35 (721.47, 1613.71) | 719.15 (430.69, 1016.88) | 511.19 (94.72, 728.41) |
| Montenegro | 3.30 (2.65, 4.12) | 1.50 (1.19, 1.90) | 1.80 (1.44, 2.28) | 0.29 (0.13, 1.71) | 0.13 (0.07, 0.15) | 0.16 (0.05, 1.57) | 8.45 (4.88, 38.19) | 3.67 (2.45, 4.37) | 4.77 (2.17, 34.21) |
| Morocco | 191.43 (152.82, 234.48) | 85.93 (68.24, 104.27) | 105.50 (84.87, 129.54) | 131.02 (50.26, 201.15) | 55.10 (15.52, 84.72) | 75.91 (31.18, 133.05) | 4558.95 (2226.46, 6953.34) | 2082.27 (757.18, 3172.21) | 2476.68 (1291.58, 4391.35) |
| Mozambique | 184.43 (151.71, 222.32) | 75.85 (62.79, 92.39) | 108.59 (88.56, 131.43) | 40.25 (18.01, 70.27) | 26.11 (11.60, 46.81) | 14.14 (5.72, 39.30) | 2156.89 (1087.08, 3608.29) | 1445.00 (706.11, 2437.87) | 711.89 (311.95, 1843.30) |
| Myanmar | 321.32 (259.18, 391.42) | 141.83 (114.14, 172.59) | 179.49 (145.31, 218.23) | 75.38 (48.28, 178.16) | 32.52 (20.99, 74.05) | 42.85 (23.51, 130.47) | 3636.27 (2377.29, 7103.61) | 1664.89 (1046.05, 3893.57) | 1971.37 (1178.41, 4537.43) |
| Namibia | 16.70 (13.57, 19.95) | 7.00 (5.72, 8.35) | 9.70 (7.93, 11.52) | 2.18 (1.50, 3.03) | 1.30 (0.91, 1.92) | 0.88 (0.51, 1.42) | 99.18 (67.19, 140.65) | 57.26 (39.57, 85.42) | 41.92 (24.11, 67.29) |
| Nauru | 0.05 (0.04, 0.07) | 0.02 (0.02, 0.03) | 0.03 (0.02, 0.04) | 0.02 (0.01, 0.04) | 0.01 (0.00, 0.02) | 0.01 (0.01, 0.03) | 0.90 (0.52, 1.81) | 0.35 (0.19, 0.74) | 0.55 (0.30, 1.34) |
| Nepal | 154.71 (125.48, 186.82) | 63.54 (50.51, 76.99) | 91.17 (74.69, 111.06) | 67.87 (34.14, 116.67) | 27.63 (12.13, 55.98) | 40.24 (17.17, 69.11) | 2556.76 (1464.97, 3967.16) | 1100.16 (550.69, 1915.72) | 1456.59 (686.31, 2486.12) |
| Netherlands | 127.82 (101.71, 158.97) | 59.09 (46.67, 75.57) | 68.73 (55.02, 86.55) | 47.80 (41.31, 53.33) | 15.24 (13.51, 17.07) | 32.57 (27.21, 37.08) | 1004.24 (915.13, 1106.04) | 332.56 (302.24, 367.84) | 671.68 (600.10, 747.01) |
| New Zealand | 27.91 (22.44, 34.96) | 13.06 (10.43, 16.57) | 14.85 (11.98, 18.39) | 7.61 (6.67, 8.48) | 2.02 (1.81, 2.22) | 5.59 (4.82, 6.37) | 226.37 (206.88, 249.31) | 59.54 (53.98, 64.89) | 166.82 (149.57, 186.49) |
| Nicaragua | 30.19 (24.62, 36.44) | 12.99 (10.56, 15.84) | 17.20 (14.06, 20.72) | 2.31 (1.42, 8.77) | 0.72 (0.47, 1.07) | 1.59 (0.85, 7.49) | 102.47 (68.95, 301.79) | 34.96 (24.16, 53.34) | 67.51 (41.62, 254.64) |
| Niger | 91.81 (75.80, 110.48) | 38.22 (31.28, 46.15) | 53.59 (44.16, 65.00) | 30.57 (10.78, 61.19) | 18.10 (5.10, 40.31) | 12.47 (4.25, 35.36) | 1835.09 (768.47, 3526.14) | 1126.84 (386.86, 2327.30) | 708.25 (240.16, 1744.29) |
| Nigeria | 1019.82 (837.32, 1241.21) | 397.11 (325.24, 484.17) | 622.70 (510.58, 758.71) | 227.64 (153.30, 332.36) | 146.91 (92.10, 226.68) | 80.73 (45.77, 148.70) | 15080.70 (10536.54, 21577.96) | 10195.99 (6949.65, 14581.68) | 4884.71 (2609.48, 8743.66) |
| Niue | 0.01 (0.01, 0.01) | 0.00 (0.00, 0.01) | 0.01 (0.00, 0.01) | 0.00 (0.00, 0.01) | 0.00 (0.00, 0.00) | 0.00 (0.00, 0.01) | 0.17 (0.10, 0.35) | 0.05 (0.03, 0.13) | 0.11 (0.06, 0.26) |
| North Macedonia | 13.76 (10.88, 17.19) | 6.52 (5.10, 8.10) | 7.24 (5.75, 9.11) | 3.43 (1.76, 6.20) | 1.00 (0.60, 1.59) | 2.43 (1.03, 5.02) | 89.81 (46.67, 153.39) | 26.82 (16.09, 43.80) | 62.98 (27.33, 118.97) |
| Northern Mariana Islands | 0.29 (0.23, 0.37) | 0.14 (0.11, 0.18) | 0.15 (0.12, 0.19) | 0.05 (0.03, 0.11) | 0.02 (0.01, 0.04) | 0.03 (0.02, 0.08) | 1.68 (1.05, 3.40) | 0.61 (0.37, 1.31) | 1.07 (0.58, 2.49) |
| Norway | 32.77 (26.28, 39.95) | 15.76 (12.58, 19.24) | 17.02 (13.73, 20.75) | 4.77 (4.24, 5.20) | 1.59 (1.45, 1.72) | 3.19 (2.75, 3.53) | 132.81 (121.41, 148.29) | 45.31 (40.84, 51.31) | 87.50 (79.37, 97.08) |
| Oman | 19.83 (15.91, 24.68) | 11.75 (9.30, 15.03) | 8.08 (6.49, 9.88) | 2.64 (0.95, 5.07) | 1.10 (0.39, 1.57) | 1.53 (0.49, 3.94) | 133.70 (51.07, 241.29) | 59.77 (23.50, 84.32) | 73.93 (25.01, 176.93) |
| Pakistan | 1050.97 (847.74, 1261.48) | 472.45 (380.52, 569.82) | 578.52 (469.25, 693.29) | 484.97 (311.47, 747.24) | 226.13 (150.93, 391.33) | 258.84 (109.99, 420.57) | 26574.00 (16921.27, 38115.28) | 13059.87 (9012.23, 19562.16) | 13514.13 (5804.84, 21220.99) |
| Palau | 0.13 (0.10, 0.17) | 0.07 (0.05, 0.08) | 0.07 (0.05, 0.08) | 0.02 (0.01, 0.05) | 0.01 (0.00, 0.02) | 0.01 (0.01, 0.03) | 0.76 (0.38, 1.58) | 0.30 (0.15, 0.64) | 0.46 (0.22, 1.04) |
| Palestine | 18.59 (15.02, 22.48) | 8.60 (6.91, 10.42) | 9.99 (8.00, 12.14) | 3.85 (1.54, 10.54) | 1.55 (0.62, 2.15) | 2.30 (0.81, 9.20) | 212.16 (91.01, 499.79) | 97.20 (40.59, 146.82) | 114.95 (44.75, 407.45) |
| Panama | 19.39 (15.78, 23.79) | 8.62 (7.01, 10.61) | 10.76 (8.68, 13.17) | 2.57 (2.04, 3.08) | 0.59 (0.45, 0.72) | 1.98 (1.57, 2.38) | 88.67 (73.65, 104.21) | 22.28 (18.14, 26.91) | 66.39 (55.22, 78.35) |
| Papua New Guinea | 46.97 (38.21, 56.93) | 21.76 (17.48, 26.21) | 25.21 (20.28, 30.82) | 20.46 (13.24, 35.65) | 8.46 (5.53, 17.53) | 12.00 (6.36, 22.98) | 1243.25 (832.13, 2019.84) | 503.98 (336.34, 952.43) | 739.26 (366.19, 1326.89) |
| Paraguay | 28.05 (22.83, 33.72) | 12.57 (10.20, 15.29) | 15.48 (12.62, 18.94) | 4.25 (2.58, 12.43) | 1.18 (0.72, 1.68) | 3.07 (1.65, 11.54) | 156.73 (102.90, 384.23) | 46.93 (32.02, 64.32) | 109.81 (66.08, 325.27) |
| Peru | 193.27 (157.16, 232.69) | 83.64 (67.23, 102.29) | 109.63 (89.18, 131.71) | 42.84 (30.81, 62.50) | 16.07 (11.23, 22.68) | 26.77 (17.78, 42.52) | 1606.97 (1197.34, 2183.81) | 606.60 (428.16, 819.51) | 1000.38 (692.05, 1422.54) |
| Philippines | 638.83 (517.78, 771.54) | 326.92 (266.10, 396.69) | 311.91 (253.63, 374.86) | 69.90 (47.94, 183.52) | 25.64 (17.57, 31.23) | 44.25 (26.60, 151.62) | 3530.66 (2583.73, 7427.35) | 1362.11 (1011.68, 1688.01) | 2168.54 (1418.90, 5657.36) |
| Poland | 264.74 (213.81, 326.88) | 123.43 (98.76, 152.53) | 141.31 (115.04, 175.76) | 77.24 (69.35, 84.06) | 32.97 (29.08, 36.91) | 44.27 (38.57, 49.70) | 2111.87 (1911.59, 2297.01) | 910.08 (815.02, 1010.35) | 1201.80 (1060.67, 1339.24) |
| Portugal | 46.60 (37.02, 57.78) | 20.61 (16.14, 25.69) | 25.99 (20.85, 32.10) | 56.06 (47.71, 63.05) | 15.16 (12.95, 17.50) | 40.90 (33.90, 46.91) | 1021.59 (916.59, 1117.23) | 301.42 (269.58, 335.72) | 720.17 (633.35, 803.01) |
| Puerto Rico | 21.20 (16.97, 26.68) | 8.91 (7.07, 11.17) | 12.30 (9.88, 15.43) | 6.06 (5.04, 7.15) | 2.26 (1.86, 2.71) | 3.81 (3.11, 4.54) | 158.46 (132.47, 185.01) | 62.77 (52.61, 74.37) | 95.69 (79.65, 113.69) |
| Qatar | 10.62 (8.11, 13.55) | 7.34 (5.51, 9.52) | 3.28 (2.62, 4.18) | 1.29 (0.65, 2.07) | 0.79 (0.40, 1.23) | 0.50 (0.24, 1.20) | 68.65 (37.26, 102.12) | 43.33 (23.89, 64.27) | 25.33 (12.36, 61.35) |
| Republic of Korea | 220.20 (173.45, 280.29) | 110.70 (85.16, 144.94) | 109.50 (86.50, 140.32) | 39.43 (22.00, 136.24) | 9.29 (6.30, 12.98) | 30.14 (15.35, 128.26) | 1245.74 (841.77, 2906.39) | 361.26 (269.57, 500.91) | 884.48 (566.78, 2571.67) |
| Republic of Moldova | 21.02 (16.86, 26.26) | 8.45 (6.69, 10.51) | 12.57 (10.20, 16.16) | 0.32 (0.28, 0.38) | 0.09 (0.08, 0.11) | 0.23 (0.20, 0.28) | 22.22 (17.53, 28.72) | 7.11 (5.59, 9.27) | 15.11 (11.97, 19.59) |
| Romania | 126.49 (102.20, 158.65) | 56.08 (44.29, 70.76) | 70.41 (56.63, 89.21) | 170.10 (145.82, 194.90) | 64.55 (55.33, 73.71) | 105.55 (89.85, 121.79) | 3948.61 (3383.73, 4490.62) | 1546.08 (1331.77, 1766.00) | 2402.53 (2050.75, 2740.26) |
| Russian Federation | 804.03 (647.18, 999.03) | 321.65 (257.47, 402.88) | 482.38 (388.43, 599.66) | 220.72 (204.07, 238.34) | 109.74 (99.06, 120.86) | 110.98 (99.24, 121.93) | 6389.11 (5934.38, 6897.28) | 3293.73 (2973.09, 3602.91) | 3095.38 (2769.31, 3409.76) |
| Rwanda | 91.83 (75.75, 110.35) | 37.44 (30.85, 45.26) | 54.38 (44.65, 65.02) | 13.93 (6.15, 29.60) | 7.10 (2.93, 15.15) | 6.84 (2.84, 21.82) | 725.39 (355.63, 1528.51) | 370.94 (172.42, 742.14) | 354.45 (159.76, 1053.69) |
| Saint Kitts and Nevis | 0.36 (0.28, 0.45) | 0.16 (0.13, 0.21) | 0.20 (0.16, 0.25) | 0.04 (0.03, 0.05) | 0.00 (0.00, 0.00) | 0.04 (0.03, 0.05) | 1.38 (1.14, 1.70) | 0.09 (0.07, 0.12) | 1.29 (1.05, 1.59) |
| Saint Lucia | 1.00 (0.80, 1.25) | 0.44 (0.35, 0.55) | 0.56 (0.44, 0.70) | 0.52 (0.43, 0.62) | 0.25 (0.21, 0.31) | 0.27 (0.22, 0.32) | 16.12 (13.19, 19.49) | 7.93 (6.44, 9.69) | 8.19 (6.74, 9.90) |
| Saint Vincent and the Grenadines | 0.63 (0.50, 0.78) | 0.29 (0.23, 0.36) | 0.34 (0.27, 0.42) | 0.08 (0.07, 0.09) | 0.06 (0.05, 0.07) | 0.02 (0.01, 0.02) | 2.81 (2.44, 3.27) | 2.05 (1.76, 2.40) | 0.76 (0.65, 0.89) |
| Samoa | 0.93 (0.75, 1.12) | 0.43 (0.35, 0.52) | 0.50 (0.41, 0.61) | 0.30 (0.20, 0.64) | 0.11 (0.08, 0.22) | 0.19 (0.12, 0.51) | 12.36 (8.35, 23.27) | 4.54 (3.10, 9.33) | 7.82 (4.80, 17.82) |
| San Marino | 0.20 (0.16, 0.25) | 0.09 (0.07, 0.11) | 0.11 (0.09, 0.13) | 0.04 (0.03, 0.11) | 0.01 (0.01, 0.02) | 0.03 (0.01, 0.10) | 0.91 (0.59, 1.90) | 0.33 (0.22, 0.51) | 0.59 (0.35, 1.59) |
| Sao Tome and Principe | 0.87 (0.71, 1.07) | 0.37 (0.30, 0.45) | 0.50 (0.40, 0.62) | 0.17 (0.06, 0.32) | 0.08 (0.03, 0.17) | 0.08 (0.03, 0.21) | 7.75 (3.30, 15.46) | 3.97 (1.64, 8.18) | 3.78 (1.46, 9.45) |
| Saudi Arabia | 156.32 (122.66, 198.44) | 86.59 (67.49, 110.72) | 69.73 (55.24, 87.45) | 18.01 (9.19, 35.62) | 5.44 (2.93, 7.71) | 12.58 (5.40, 29.38) | 871.78 (464.94, 1517.88) | 282.73 (165.99, 402.43) | 589.05 (273.94, 1234.17) |
| Senegal | 80.17 (65.87, 96.04) | 34.05 (27.59, 41.35) | 46.12 (38.10, 54.91) | 17.87 (7.15, 31.77) | 10.53 (3.94, 21.33) | 7.34 (2.94, 18.40) | 904.41 (433.44, 1527.52) | 539.68 (241.69, 1036.69) | 364.73 (176.20, 870.68) |
| Serbia | 57.44 (46.15, 71.66) | 26.22 (20.89, 32.68) | 31.22 (24.99, 39.35) | 14.80 (8.97, 30.18) | 5.02 (3.19, 6.96) | 9.79 (4.96, 24.73) | 337.04 (214.51, 618.06) | 114.84 (79.94, 155.76) | 222.20 (125.85, 498.11) |
| Seychelles | 0.59 (0.47, 0.73) | 0.30 (0.24, 0.38) | 0.29 (0.23, 0.36) | 0.08 (0.04, 0.24) | 0.03 (0.01, 0.06) | 0.06 (0.02, 0.22) | 3.10 (1.90, 6.74) | 0.99 (0.60, 2.32) | 2.11 (1.16, 5.37) |
| Sierra Leone | 38.99 (31.87, 47.55) | 16.75 (13.76, 20.36) | 22.24 (17.93, 27.18) | 12.38 (6.57, 20.64) | 8.19 (4.20, 13.88) | 4.19 (1.79, 9.63) | 774.42 (456.65, 1267.76) | 531.80 (306.06, 841.79) | 242.62 (98.47, 541.13) |
| Singapore | 26.44 (20.84, 33.48) | 13.56 (10.67, 17.38) | 12.88 (10.15, 16.18) | 5.99 (5.28, 6.63) | 1.41 (1.26, 1.60) | 4.58 (3.92, 5.11) | 207.22 (187.16, 227.83) | 55.19 (49.24, 62.21) | 152.03 (135.00, 167.94) |
| Slovakia | 37.34 (29.94, 46.79) | 16.87 (13.42, 21.17) | 20.47 (16.43, 25.91) | 5.61 (3.48, 11.40) | 1.71 (1.16, 2.55) | 3.90 (2.21, 9.43) | 154.00 (99.90, 267.81) | 50.21 (35.13, 72.90) | 103.80 (62.37, 197.69) |
| Slovenia | 14.17 (11.36, 17.75) | 6.48 (5.23, 8.27) | 7.69 (6.16, 9.67) | 1.78 (1.49, 2.07) | 0.68 (0.57, 0.78) | 1.10 (0.88, 1.31) | 38.21 (32.76, 44.40) | 15.74 (13.41, 18.41) | 22.47 (18.71, 26.55) |
| Solomon Islands | 3.22 (2.63, 3.87) | 1.48 (1.19, 1.79) | 1.74 (1.42, 2.10) | 0.76 (0.49, 1.45) | 0.36 (0.24, 0.75) | 0.40 (0.21, 0.92) | 33.63 (22.54, 58.79) | 15.38 (10.42, 31.12) | 18.24 (9.84, 38.90) |
| Somalia | 115.04 (94.97, 140.65) | 49.98 (40.49, 61.53) | 65.06 (54.01, 78.73) | 34.20 (9.37, 73.40) | 22.61 (5.16, 54.23) | 11.60 (3.21, 39.58) | 2163.18 (667.22, 4512.51) | 1464.52 (381.86, 3487.32) | 698.66 (200.32, 2316.16) |
| South Africa | 398.34 (323.73, 482.00) | 170.39 (138.78, 209.58) | 227.95 (185.48, 273.95) | 46.42 (34.93, 54.51) | 24.79 (19.93, 30.30) | 21.63 (13.90, 28.20) | 1931.64 (1491.04, 2297.19) | 1044.97 (850.99, 1252.68) | 886.67 (605.85, 1126.08) |
| South Sudan | 58.21 (47.21, 69.96) | 25.79 (20.95, 30.92) | 32.42 (26.25, 39.26) | 16.92 (8.78, 30.28) | 11.25 (5.30, 20.35) | 5.67 (2.16, 15.10) | 1105.76 (627.72, 2079.55) | 740.41 (381.43, 1258.38) | 365.35 (134.27, 902.44) |
| Spain | 251.47 (201.60, 314.42) | 118.44 (94.05, 150.51) | 133.03 (108.15, 166.60) | 240.60 (200.21, 270.13) | 61.10 (53.78, 68.43) | 179.50 (143.95, 207.36) | 4291.57 (3844.77, 4655.45) | 1253.14 (1130.60, 1381.79) | 3038.43 (2614.40, 3370.16) |
| Sri Lanka | 148.26 (117.85, 183.67) | 67.79 (53.68, 83.81) | 80.47 (64.33, 99.64) | 101.29 (63.11, 147.64) | 38.87 (23.69, 55.29) | 62.42 (35.07, 99.71) | 3523.42 (2180.30, 5135.34) | 1397.27 (862.93, 1948.27) | 2126.15 (956.45, 3372.94) |
| Sudan | 167.22 (136.96, 201.07) | 77.10 (62.10, 92.69) | 90.12 (74.55, 110.27) | 123.99 (59.59, 183.20) | 68.35 (26.51, 101.76) | 55.64 (23.29, 101.19) | 7551.16 (3740.14, 11346.37) | 4442.10 (1796.73, 6832.46) | 3109.06 (1311.94, 5889.38) |
| Suriname | 3.28 (2.64, 4.06) | 1.40 (1.12, 1.74) | 1.87 (1.53, 2.32) | 1.88 (1.40, 2.77) | 0.69 (0.50, 1.03) | 1.19 (0.85, 1.91) | 78.75 (58.49, 109.37) | 31.68 (21.85, 48.05) | 47.06 (28.26, 71.62) |
| Sweden | 114.04 (92.78, 141.05) | 50.08 (40.25, 61.09) | 63.96 (52.29, 79.68) | 25.84 (21.97, 28.92) | 7.85 (6.64, 9.09) | 17.99 (14.77, 20.73) | 603.82 (539.78, 678.23) | 196.85 (168.94, 224.98) | 406.98 (352.99, 464.87) |
| Switzerland | 94.59 (77.49, 116.58) | 42.59 (34.32, 53.20) | 52.00 (42.58, 63.93) | 37.40 (30.50, 42.49) | 12.81 (10.99, 14.60) | 24.59 (19.12, 28.55) | 714.97 (633.62, 793.84) | 265.14 (236.63, 298.20) | 449.83 (389.05, 508.39) |
| Syrian Arab Republic | 86.15 (68.74, 105.80) | 38.65 (30.81, 47.69) | 47.50 (37.84, 58.88) | 6.17 (2.73, 33.04) | 2.11 (1.14, 2.78) | 4.06 (1.52, 30.31) | 283.90 (132.91, 1389.63) | 101.26 (56.72, 148.00) | 182.64 (73.65, 1302.49) |
| Taiwan (Province of China) | 155.51 (123.83, 195.11) | 71.59 (56.70, 90.84) | 83.92 (66.27, 106.45) | 76.80 (65.75, 84.87) | 26.88 (23.71, 30.03) | 49.92 (41.09, 56.28) | 1514.76 (1353.04, 1648.99) | 544.23 (486.15, 602.55) | 970.53 (842.03, 1073.67) |
| Tajikistan | 35.22 (28.64, 42.73) | 15.84 (12.80, 19.29) | 19.38 (15.73, 23.64) | 53.18 (34.31, 72.52) | 26.93 (16.21, 39.54) | 26.25 (9.08, 39.14) | 2491.46 (1593.07, 3452.28) | 1266.36 (764.68, 1859.05) | 1225.10 (435.06, 1863.23) |
| Thailand | 478.07 (378.72, 598.86) | 219.23 (173.37, 273.73) | 258.84 (206.79, 329.19) | 62.39 (34.54, 281.83) | 19.64 (12.28, 24.79) | 42.75 (20.79, 256.95) | 2148.57 (1424.85, 6094.36) | 770.14 (544.92, 1030.25) | 1378.43 (816.60, 5139.17) |
| Timor-Leste | 6.24 (5.05, 7.43) | 2.89 (2.33, 3.49) | 3.34 (2.71, 3.97) | 1.63 (0.96, 3.71) | 0.71 (0.40, 1.44) | 0.92 (0.46, 2.69) | 87.79 (51.93, 174.00) | 41.08 (23.21, 88.18) | 46.71 (22.83, 112.23) |
| Togo | 38.68 (31.51, 46.76) | 15.73 (12.62, 19.23) | 22.96 (18.72, 27.61) | 8.78 (4.03, 14.62) | 5.05 (2.22, 9.08) | 3.73 (1.66, 8.25) | 459.61 (236.88, 734.42) | 276.20 (139.31, 448.11) | 183.42 (92.87, 385.78) |
| Tokelau | 0.01 (0.01, 0.01) | 0.00 (0.00, 0.00) | 0.00 (0.00, 0.01) | 0.00 (0.00, 0.01) | 0.00 (0.00, 0.00) | 0.00 (0.00, 0.01) | 0.16 (0.10, 0.37) | 0.05 (0.03, 0.11) | 0.11 (0.06, 0.29) |
| Tonga | 0.49 (0.40, 0.59) | 0.21 (0.18, 0.26) | 0.27 (0.22, 0.34) | 0.12 (0.08, 0.28) | 0.04 (0.03, 0.09) | 0.07 (0.04, 0.21) | 4.37 (2.88, 9.01) | 1.76 (1.19, 3.42) | 2.61 (1.60, 6.40) |
| Trinidad and Tobago | 7.93 (6.29, 9.87) | 3.50 (2.76, 4.34) | 4.43 (3.56, 5.52) | 3.01 (2.33, 3.86) | 0.83 (0.63, 1.09) | 2.18 (1.68, 2.80) | 110.36 (84.94, 141.81) | 31.65 (24.28, 40.89) | 78.71 (59.16, 103.00) |
| Tunisia | 60.51 (47.78, 74.77) | 27.28 (21.44, 34.06) | 33.23 (26.43, 40.91) | 39.60 (12.16, 66.67) | 14.09 (4.04, 22.32) | 25.51 (8.35, 49.96) | 1063.53 (438.06, 1720.93) | 436.09 (160.17, 630.79) | 627.44 (270.59, 1183.68) |
| Turkey | 477.78 (380.63, 588.10) | 216.27 (172.10, 270.20) | 261.51 (209.38, 321.53) | 407.93 (312.94, 561.59) | 147.96 (106.50, 189.42) | 259.97 (174.31, 400.10) | 12652.38 (9855.73, 15875.26) | 5231.06 (3856.81, 6527.02) | 7421.31 (4796.19, 10204.95) |
| Turkmenistan | 21.49 (17.32, 26.18) | 9.56 (7.65, 11.76) | 11.93 (9.68, 14.74) | 9.49 (7.09, 12.41) | 4.84 (3.60, 6.40) | 4.65 (3.43, 6.19) | 379.66 (289.51, 499.33) | 210.49 (160.23, 275.47) | 169.16 (120.80, 238.15) |
| Tuvalu | 0.07 (0.06, 0.09) | 0.03 (0.03, 0.04) | 0.04 (0.03, 0.05) | 0.02 (0.01, 0.05) | 0.01 (0.01, 0.02) | 0.01 (0.01, 0.04) | 0.83 (0.54, 1.59) | 0.33 (0.20, 0.74) | 0.50 (0.31, 1.11) |
| Uganda | 278.40 (230.07, 338.19) | 115.76 (95.22, 140.79) | 162.64 (134.44, 196.49) | 40.67 (22.16, 72.11) | 24.06 (12.80, 40.22) | 16.61 (7.70, 45.21) | 2530.95 (1529.46, 4433.19) | 1514.24 (872.76, 2458.68) | 1016.71 (501.01, 2589.68) |
| Ukraine | 290.31 (233.70, 362.45) | 116.51 (92.83, 149.38) | 173.79 (140.24, 219.30) | 41.72 (30.93, 53.08) | 22.34 (15.19, 30.55) | 19.38 (12.35, 27.70) | 1546.73 (1172.39, 1956.09) | 816.06 (563.18, 1094.58) | 730.67 (492.42, 1016.37) |
| United Arab Emirates | 45.54 (34.00, 60.79) | 33.08 (24.40, 44.49) | 12.46 (9.55, 16.71) | 9.66 (5.42, 12.45) | 2.85 (2.09, 3.79) | 6.81 (2.56, 9.17) | 433.66 (265.84, 540.84) | 146.72 (112.12, 189.64) | 286.94 (117.19, 382.69) |
| United Kingdom | 271.65 (216.99, 336.46) | 129.30 (103.69, 161.77) | 142.35 (114.01, 176.42) | 118.93 (106.70, 125.68) | 40.88 (38.21, 42.74) | 78.05 (68.68, 83.38) | 3037.04 (2871.89, 3181.12) | 1111.76 (1057.96, 1168.19) | 1925.28 (1804.46, 2023.48) |
| United Republic of Tanzania | 334.29 (274.71, 399.20) | 139.88 (113.86, 167.52) | 194.42 (160.63, 234.85) | 61.98 (31.43, 113.13) | 34.54 (16.62, 60.93) | 27.44 (13.05, 68.79) | 3514.28 (2011.80, 6433.38) | 2009.72 (1111.44, 3432.71) | 1504.56 (768.03, 3485.77) |
| United States of America | 1386.00 (1099.12, 1723.02) | 642.21 (505.97, 801.15) | 743.79 (595.08, 924.29) | 1785.10 (1535.37, 1944.86) | 549.99 (497.70, 591.83) | 1235.11 (1037.56, 1359.80) | 36197.64 (33003.84, 38647.83) | 12498.01 (11646.49, 13238.46) | 23699.63 (21243.00, 25513.43) |
| United States Virgin Islands | 0.60 (0.48, 0.75) | 0.26 (0.21, 0.33) | 0.34 (0.27, 0.43) | 0.20 (0.14, 0.36) | 0.10 (0.06, 0.14) | 0.10 (0.05, 0.22) | 6.06 (4.33, 8.63) | 3.16 (2.12, 4.33) | 2.89 (1.76, 4.78) |
| Uruguay | 13.27 (10.64, 16.25) | 5.95 (4.73, 7.27) | 7.32 (5.90, 8.99) | 7.93 (7.08, 8.69) | 1.59 (1.43, 1.76) | 6.33 (5.56, 6.97) | 218.20 (200.03, 238.37) | 47.93 (43.54, 52.78) | 170.27 (154.65, 187.09) |
| Uzbekistan | 144.53 (116.32, 176.79) | 63.21 (50.53, 77.67) | 81.32 (65.64, 99.50) | 96.84 (77.07, 119.02) | 46.36 (36.81, 56.68) | 50.48 (40.31, 62.41) | 3874.23 (3132.71, 4698.68) | 1948.95 (1569.79, 2350.86) | 1925.28 (1548.66, 2354.25) |
| Vanuatu | 1.37 (1.11, 1.67) | 0.63 (0.51, 0.76) | 0.74 (0.60, 0.92) | 0.44 (0.29, 0.88) | 0.19 (0.12, 0.37) | 0.25 (0.14, 0.63) | 21.52 (14.19, 41.20) | 9.04 (5.76, 17.68) | 12.48 (7.08, 28.71) |
| Venezuela (Bolivarian Republic of) | 148.61 (120.00, 182.80) | 64.42 (52.24, 80.06) | 84.19 (67.70, 102.95) | 12.03 (9.21, 15.33) | 5.22 (3.94, 6.72) | 6.81 (5.12, 8.73) | 491.58 (391.39, 609.33) | 218.27 (167.81, 274.67) | 273.31 (215.97, 339.99) |
| Viet Nam | 503.65 (403.39, 630.57) | 236.49 (189.19, 293.99) | 267.17 (211.12, 335.50) | 105.57 (52.95, 331.83) | 36.57 (22.22, 77.02) | 68.99 (26.41, 293.57) | 3746.81 (2123.06, 8856.42) | 1425.23 (947.09, 3052.65) | 2321.58 (1073.42, 6770.84) |
| Yemen | 154.09 (126.36, 186.92) | 68.76 (55.97, 82.87) | 85.33 (69.61, 104.34) | 106.18 (49.25, 160.25) | 54.70 (19.12, 83.79) | 51.47 (19.09, 91.72) | 5974.80 (2916.76, 8720.97) | 3248.70 (1296.90, 4880.75) | 2726.10 (1009.87, 4797.67) |
| Zambia | 138.75 (114.52, 168.22) | 59.91 (49.47, 73.65) | 78.84 (65.25, 95.40) | 25.73 (9.48, 51.66) | 12.63 (4.37, 25.38) | 13.10 (4.75, 31.15) | 1342.55 (566.65, 2580.89) | 638.01 (259.65, 1236.11) | 704.54 (279.60, 1618.47) |
| Zimbabwe | 85.51 (70.00, 102.95) | 34.78 (28.14, 42.51) | 50.74 (41.36, 61.42) | 18.38 (11.85, 26.91) | 10.98 (6.74, 17.99) | 7.41 (4.11, 12.55) | 955.43 (595.20, 1431.59) | 550.13 (330.42, 948.58) | 405.31 (218.02, 701.21) |

DALYs, disability-adjusted life years; UI, uncertainty interval; SDI, Sociodemographic Index; PAH, pulmonary arterial hypertension.
