# Supplementary material for: Global, regional, and national burden of pulmonary arterial hypertension, 1990–2021, with projections to 2045: a systematic analysis for the Global Burden of Disease Study 2021
Source: Research Square preprint supplement (doi:10.21203/rs.3.rs-6936502/v1), 2025-07-24
Supplement: Supplementary file 3 [file b3ab735ae60c36082d4ddf7f.docx]

**Table S2. ASIR, ASMR, and ASDR for PAH in 204 countries in 2021**

|  | **ASIR/100,000 persons (95% UI)** | | | **ASMR/100,000 persons (95% UI)** | | | **ASDR/100,000 persons (95% UI)** | | |
| --- | --- | --- | --- | --- | --- | --- | --- | --- | --- |
| **Location** | **Both** | **Male** | **Female** | **Both** | **Male** | **Female** | **Both** | **Male** | **Female** |
| Afghanistan | 0.60 (0.72, 0.48) | 0.52 (0.63, 0.42) | 0.67 (0.80, 0.54) | 0.67 (1.10, 0.24) | 0.77 (1.42, 0.20) | 0.56 (1.09, 0.15) | 25.28 (39.03, 10.98) | 31.71 (54.19, 10.79) | 18.55 (33.73, 5.04) |
| Albania | 0.51 (0.62, 0.41) | 0.50 (0.61, 0.40) | 0.52 (0.63, 0.42) | 0.28 (0.48, 0.19) | 0.22 (0.33, 0.15) | 0.34 (0.72, 0.18) | 8.43 (14.16, 5.32) | 5.99 (9.47, 4.13) | 10.87 (22.00, 5.50) |
| Algeria | 0.50 (0.60, 0.40) | 0.45 (0.55, 0.36) | 0.55 (0.67, 0.44) | 0.40 (0.61, 0.13) | 0.27 (0.39, 0.08) | 0.59 (1.03, 0.19) | 11.09 (16.62, 4.89) | 8.98 (12.49, 3.28) | 13.77 (23.91, 6.53) |
| American Samoa | 0.56 (0.67, 0.44) | 0.51 (0.62, 0.41) | 0.61 (0.73, 0.49) | 0.13 (0.28, 0.07) | 0.09 (0.19, 0.05) | 0.16 (0.42, 0.08) | 4.15 (8.06, 2.45) | 2.91 (6.15, 1.71) | 5.43 (12.10, 2.88) |
| Andorra | 0.41 (0.49, 0.33) | 0.38 (0.47, 0.31) | 0.43 (0.52, 0.35) | 0.11 (0.17, 0.07) | 0.08 (0.12, 0.05) | 0.14 (0.25, 0.09) | 3.55 (4.90, 2.51) | 2.47 (3.36, 1.71) | 4.69 (6.81, 3.17) |
| Angola | 0.86 (1.02, 0.70) | 0.77 (0.94, 0.63) | 0.93 (1.11, 0.76) | 0.19 (0.36, 0.09) | 0.22 (0.41, 0.10) | 0.17 (0.43, 0.08) | 6.21 (11.56, 3.27) | 6.98 (11.89, 3.49) | 5.53 (13.19, 2.79) |
| Antigua and Barbuda | 0.47 (0.57, 0.38) | 0.42 (0.51, 0.34) | 0.51 (0.62, 0.41) | 0.04 (0.04, 0.04) | 0.05 (0.05, 0.04) | 0.03 (0.04, 0.03) | 1.50 (1.64, 1.37) | 1.56 (1.73, 1.41) | 1.43 (1.61, 1.27) |
| Argentina | 0.33 (0.40, 0.27) | 0.32 (0.39, 0.26) | 0.34 (0.42, 0.28) | 0.20 (0.22, 0.19) | 0.15 (0.17, 0.14) | 0.25 (0.27, 0.23) | 7.12 (7.76, 6.62) | 5.16 (5.68, 4.70) | 8.93 (9.76, 8.22) |
| Armenia | 0.42 (0.51, 0.34) | 0.38 (0.47, 0.31) | 0.44 (0.54, 0.36) | 0.08 (0.09, 0.06) | 0.10 (0.12, 0.08) | 0.06 (0.08, 0.05) | 2.18 (2.53, 1.82) | 2.79 (3.25, 2.33) | 1.65 (1.92, 1.39) |
| Australia | 0.36 (0.44, 0.29) | 0.34 (0.42, 0.27) | 0.38 (0.47, 0.31) | 0.12 (0.13, 0.10) | 0.08 (0.09, 0.07) | 0.15 (0.17, 0.12) | 3.69 (4.03, 3.36) | 2.55 (2.90, 2.27) | 4.77 (5.28, 4.28) |
| Austria | 0.39 (0.47, 0.31) | 0.37 (0.45, 0.30) | 0.41 (0.49, 0.33) | 0.13 (0.14, 0.12) | 0.12 (0.13, 0.11) | 0.14 (0.15, 0.12) | 3.47 (3.77, 3.21) | 3.10 (3.39, 2.83) | 3.82 (4.22, 3.49) |
| Azerbaijan | 0.39 (0.47, 0.32) | 0.35 (0.43, 0.28) | 0.42 (0.52, 0.34) | 0.57 (0.85, 0.36) | 0.63 (0.95, 0.40) | 0.54 (0.99, 0.26) | 17.64 (27.74, 10.69) | 18.62 (29.58, 11.31) | 16.89 (32.52, 7.20) |
| Bahamas | 0.49 (0.59, 0.40) | 0.45 (0.54, 0.36) | 0.54 (0.65, 0.43) | 0.40 (0.50, 0.32) | 0.34 (0.41, 0.27) | 0.46 (0.57, 0.37) | 14.75 (18.62, 11.70) | 12.21 (15.32, 9.57) | 17.03 (21.44, 13.40) |
| Bahrain | 0.46 (0.56, 0.37) | 0.42 (0.52, 0.34) | 0.51 (0.63, 0.41) | 0.16 (0.31, 0.07) | 0.11 (0.17, 0.05) | 0.21 (0.54, 0.09) | 4.52 (8.02, 2.26) | 3.56 (5.49, 1.83) | 5.81 (14.16, 2.68) |
| Bangladesh | 0.52 (0.62, 0.42) | 0.46 (0.56, 0.37) | 0.58 (0.70, 0.47) | 0.30 (0.57, 0.14) | 0.27 (0.64, 0.11) | 0.34 (0.64, 0.15) | 8.66 (13.69, 4.81) | 6.78 (12.89, 3.28) | 10.51 (17.30, 5.31) |
| Barbados | 0.44 (0.53, 0.36) | 0.39 (0.48, 0.32) | 0.49 (0.60, 0.39) | 0.36 (0.45, 0.29) | 0.30 (0.38, 0.23) | 0.42 (0.52, 0.34) | 11.88 (15.07, 9.32) | 9.36 (12.16, 7.18) | 14.19 (18.03, 11.13) |
| Belarus | 0.39 (0.49, 0.32) | 0.37 (0.45, 0.30) | 0.41 (0.51, 0.33) | 0.04 (0.05, 0.03) | 0.05 (0.05, 0.04) | 0.04 (0.05, 0.03) | 1.63 (1.89, 1.37) | 1.62 (1.88, 1.37) | 1.67 (1.96, 1.40) |
| Belgium | 0.44 (0.53, 0.35) | 0.41 (0.50, 0.33) | 0.47 (0.58, 0.38) | 0.18 (0.20, 0.16) | 0.12 (0.13, 0.11) | 0.23 (0.26, 0.20) | 5.18 (5.60, 4.74) | 3.44 (3.78, 3.14) | 6.79 (7.33, 6.19) |
| Belize | 0.48 (0.57, 0.38) | 0.43 (0.52, 0.35) | 0.53 (0.63, 0.42) | 0.15 (0.16, 0.13) | 0.10 (0.12, 0.09) | 0.19 (0.22, 0.17) | 5.72 (6.45, 5.03) | 4.14 (4.80, 3.57) | 7.26 (8.22, 6.36) |
| Benin | 0.65 (0.78, 0.53) | 0.57 (0.69, 0.46) | 0.72 (0.87, 0.59) | 0.15 (0.27, 0.06) | 0.21 (0.41, 0.08) | 0.10 (0.28, 0.04) | 5.73 (9.04, 2.98) | 7.78 (12.70, 3.77) | 3.77 (8.86, 1.87) |
| Bermuda | 0.41 (0.51, 0.33) | 0.38 (0.47, 0.31) | 0.44 (0.55, 0.36) | 0.57 (0.69, 0.48) | 0.67 (0.81, 0.57) | 0.49 (0.62, 0.40) | 15.69 (19.07, 13.06) | 17.53 (21.43, 14.61) | 14.19 (17.60, 11.51) |
| Bhutan | 0.66 (0.78, 0.54) | 0.58 (0.70, 0.48) | 0.74 (0.89, 0.61) | 0.31 (0.52, 0.15) | 0.27 (0.55, 0.12) | 0.35 (0.59, 0.16) | 9.27 (14.22, 5.13) | 8.46 (14.72, 4.29) | 10.16 (17.12, 5.12) |
| Bolivia (Plurinational State of) | 0.61 (0.73, 0.49) | 0.53 (0.64, 0.42) | 0.68 (0.83, 0.55) | 0.24 (0.34, 0.17) | 0.20 (0.29, 0.14) | 0.27 (0.41, 0.17) | 9.02 (12.82, 6.57) | 7.92 (11.14, 5.22) | 10.06 (15.01, 6.63) |
| Bosnia and Herzegovina | 0.52 (0.64, 0.43) | 0.51 (0.62, 0.42) | 0.53 (0.64, 0.43) | 0.21 (0.27, 0.15) | 0.18 (0.25, 0.12) | 0.24 (0.33, 0.15) | 5.91 (7.68, 4.25) | 4.77 (6.38, 3.39) | 7.03 (9.91, 4.42) |
| Botswana | 0.90 (1.10, 0.74) | 0.83 (0.99, 0.67) | 0.97 (1.19, 0.80) | 0.10 (0.14, 0.07) | 0.13 (0.19, 0.09) | 0.09 (0.13, 0.05) | 4.04 (5.30, 2.86) | 4.68 (6.36, 3.28) | 3.52 (5.01, 2.28) |
| Brazil | 0.49 (0.59, 0.40) | 0.46 (0.56, 0.37) | 0.52 (0.63, 0.42) | 0.33 (0.34, 0.30) | 0.26 (0.27, 0.24) | 0.38 (0.41, 0.34) | 10.45 (11.02, 9.88) | 8.20 (8.78, 7.62) | 12.49 (13.20, 11.70) |
| Brunei Darussalam | 0.33 (0.40, 0.26) | 0.32 (0.40, 0.26) | 0.33 (0.42, 0.27) | 0.27 (0.34, 0.20) | 0.11 (0.14, 0.08) | 0.43 (0.54, 0.28) | 11.44 (14.88, 7.20) | 5.50 (7.79, 4.08) | 17.76 (23.01, 8.35) |
| Bulgaria | 0.45 (0.55, 0.36) | 0.44 (0.55, 0.36) | 0.45 (0.55, 0.36) | 0.09 (0.12, 0.07) | 0.07 (0.10, 0.05) | 0.11 (0.14, 0.08) | 2.87 (3.74, 2.19) | 2.14 (2.79, 1.63) | 3.59 (4.68, 2.72) |
| Burkina Faso | 0.60 (0.72, 0.49) | 0.53 (0.64, 0.42) | 0.67 (0.81, 0.54) | 0.27 (0.52, 0.09) | 0.38 (0.82, 0.10) | 0.17 (0.53, 0.07) | 8.98 (14.92, 4.20) | 12.39 (23.03, 5.06) | 5.73 (14.68, 2.61) |
| Burundi | 0.86 (1.03, 0.70) | 0.76 (0.92, 0.62) | 0.95 (1.15, 0.77) | 0.21 (0.44, 0.07) | 0.26 (0.60, 0.07) | 0.16 (0.59, 0.06) | 7.64 (15.11, 3.08) | 9.08 (18.70, 3.13) | 6.12 (20.17, 2.47) |
| Cabo Verde | 0.51 (0.63, 0.41) | 0.47 (0.58, 0.37) | 0.55 (0.68, 0.45) | 0.13 (0.24, 0.05) | 0.16 (0.30, 0.07) | 0.11 (0.26, 0.03) | 4.41 (8.30, 1.75) | 4.89 (9.30, 2.15) | 4.10 (10.22, 1.31) |
| Cambodia | 0.60 (0.73, 0.48) | 0.57 (0.69, 0.46) | 0.63 (0.75, 0.51) | 0.13 (0.35, 0.07) | 0.11 (0.23, 0.06) | 0.15 (0.47, 0.08) | 4.92 (10.08, 3.12) | 4.06 (8.94, 2.45) | 5.70 (13.42, 3.29) |
| Cameroon | 0.73 (0.88, 0.60) | 0.64 (0.77, 0.52) | 0.83 (1.00, 0.68) | 0.17 (0.31, 0.08) | 0.20 (0.38, 0.09) | 0.13 (0.31, 0.07) | 6.27 (10.57, 3.78) | 7.46 (12.59, 4.20) | 5.10 (10.50, 2.87) |
| Canada | 0.26 (0.32, 0.21) | 0.24 (0.30, 0.20) | 0.27 (0.33, 0.22) | 0.14 (0.15, 0.13) | 0.10 (0.11, 0.09) | 0.17 (0.19, 0.16) | 4.63 (4.99, 4.23) | 3.45 (3.81, 3.06) | 5.75 (6.25, 5.24) |
| Central African Republic | 0.86 (1.03, 0.70) | 0.77 (0.93, 0.62) | 0.93 (1.12, 0.77) | 0.25 (0.45, 0.10) | 0.33 (0.61, 0.12) | 0.18 (0.51, 0.08) | 8.92 (15.95, 4.34) | 11.72 (20.45, 5.01) | 6.42 (16.13, 2.80) |
| Chad | 0.61 (0.74, 0.49) | 0.53 (0.65, 0.43) | 0.69 (0.84, 0.56) | 0.24 (0.47, 0.08) | 0.30 (0.68, 0.09) | 0.18 (0.57, 0.06) | 9.18 (16.36, 4.46) | 11.78 (23.22, 5.07) | 6.41 (17.62, 2.24) |
| Chile | 0.35 (0.42, 0.28) | 0.33 (0.41, 0.27) | 0.36 (0.45, 0.29) | 0.14 (0.16, 0.13) | 0.09 (0.10, 0.08) | 0.19 (0.21, 0.17) | 5.45 (5.90, 4.99) | 3.52 (3.87, 3.19) | 7.30 (7.99, 6.60) |
| China | 0.50 (0.60, 0.40) | 0.49 (0.60, 0.40) | 0.50 (0.60, 0.40) | 0.42 (0.51, 0.28) | 0.49 (0.62, 0.31) | 0.37 (0.49, 0.23) | 8.95 (11.13, 6.04) | 9.48 (12.04, 6.05) | 8.78 (12.69, 5.66) |
| Colombia | 0.46 (0.56, 0.38) | 0.42 (0.51, 0.34) | 0.50 (0.61, 0.40) | 0.10 (0.12, 0.08) | 0.08 (0.09, 0.06) | 0.11 (0.14, 0.09) | 3.29 (3.93, 2.74) | 2.53 (3.09, 2.08) | 3.99 (4.82, 3.30) |
| Comoros | 0.84 (1.01, 0.68) | 0.74 (0.89, 0.61) | 0.93 (1.12, 0.75) | 0.15 (0.30, 0.07) | 0.17 (0.34, 0.07) | 0.14 (0.37, 0.06) | 5.92 (11.42, 3.15) | 6.14 (11.74, 3.12) | 5.72 (13.97, 2.96) |
| Congo | 0.72 (0.86, 0.58) | 0.64 (0.76, 0.51) | 0.80 (0.98, 0.65) | 0.15 (0.29, 0.08) | 0.15 (0.27, 0.08) | 0.14 (0.32, 0.08) | 4.80 (8.78, 2.93) | 4.88 (8.41, 2.82) | 4.74 (9.95, 2.84) |
| Cook Islands | 0.54 (0.66, 0.43) | 0.50 (0.61, 0.40) | 0.58 (0.71, 0.46) | 0.14 (0.33, 0.08) | 0.09 (0.18, 0.06) | 0.18 (0.50, 0.09) | 5.26 (10.93, 3.14) | 3.06 (5.76, 2.07) | 7.39 (15.83, 3.69) |
| Costa Rica | 0.44 (0.54, 0.36) | 0.40 (0.49, 0.32) | 0.48 (0.59, 0.39) | 0.10 (0.12, 0.09) | 0.10 (0.12, 0.09) | 0.11 (0.12, 0.09) | 3.31 (3.70, 2.92) | 3.17 (3.63, 2.70) | 3.43 (3.82, 3.03) |
| Coted'Ivoire | 0.71 (0.86, 0.58) | 0.63 (0.76, 0.50) | 0.80 (0.97, 0.66) | 0.18 (0.32, 0.07) | 0.22 (0.43, 0.09) | 0.13 (0.30, 0.05) | 6.79 (10.99, 3.56) | 8.50 (14.07, 4.03) | 5.00 (10.34, 2.60) |
| Croatia | 0.46 (0.56, 0.37) | 0.46 (0.55, 0.37) | 0.46 (0.56, 0.38) | 0.05 (0.05, 0.04) | 0.04 (0.04, 0.03) | 0.05 (0.06, 0.04) | 1.31 (1.53, 1.11) | 1.03 (1.20, 0.87) | 1.56 (1.85, 1.32) |
| Cuba | 0.43 (0.52, 0.35) | 0.38 (0.47, 0.31) | 0.47 (0.58, 0.39) | 0.05 (0.06, 0.04) | 0.04 (0.04, 0.03) | 0.06 (0.07, 0.05) | 1.90 (2.14, 1.64) | 1.45 (1.68, 1.24) | 2.34 (2.70, 1.99) |
| Cyprus | 0.41 (0.49, 0.33) | 0.38 (0.47, 0.31) | 0.43 (0.53, 0.35) | 0.80 (1.02, 0.38) | 0.61 (0.76, 0.44) | 0.93 (1.23, 0.24) | 17.45 (21.85, 9.61) | 13.92 (17.62, 9.80) | 20.29 (26.74, 6.90) |
| Czechia | 0.46 (0.56, 0.38) | 0.45 (0.55, 0.37) | 0.46 (0.56, 0.38) | 0.43 (0.49, 0.36) | 0.42 (0.48, 0.35) | 0.44 (0.52, 0.36) | 11.11 (12.86, 9.35) | 10.36 (11.83, 8.82) | 11.96 (14.22, 9.81) |
| Democratic People's Republic of Korea | 0.51 (0.61, 0.41) | 0.48 (0.58, 0.39) | 0.53 (0.64, 0.43) | 0.35 (0.58, 0.24) | 0.32 (0.52, 0.19) | 0.37 (0.70, 0.24) | 8.04 (13.40, 5.73) | 6.96 (10.20, 4.54) | 9.14 (18.10, 5.89) |
| Democratic Republic of the Congo | 0.83 (0.98, 0.67) | 0.74 (0.90, 0.60) | 0.90 (1.09, 0.74) | 0.19 (0.39, 0.07) | 0.22 (0.45, 0.08) | 0.17 (0.47, 0.06) | 6.13 (11.34, 2.66) | 6.98 (12.43, 2.70) | 5.39 (13.20, 2.41) |
| Denmark | 0.40 (0.49, 0.32) | 0.38 (0.47, 0.30) | 0.42 (0.52, 0.34) | 0.18 (0.19, 0.15) | 0.18 (0.20, 0.16) | 0.17 (0.19, 0.15) | 4.80 (5.20, 4.39) | 4.63 (5.13, 4.18) | 5.02 (5.53, 4.50) |
| Djibouti | 0.78 (0.94, 0.64) | 0.70 (0.86, 0.57) | 0.87 (1.04, 0.71) | 0.15 (0.29, 0.07) | 0.18 (0.35, 0.08) | 0.13 (0.35, 0.05) | 5.68 (10.81, 2.66) | 6.44 (12.55, 2.98) | 4.85 (12.10, 2.22) |
| Dominica | 0.47 (0.57, 0.38) | 0.42 (0.52, 0.34) | 0.52 (0.63, 0.42) | 0.09 (0.23, 0.07) | 0.06 (0.08, 0.04) | 0.12 (0.34, 0.08) | 3.46 (5.66, 2.49) | 2.34 (3.64, 1.62) | 4.54 (8.37, 3.15) |
| Dominican Republic | 0.53 (0.63, 0.42) | 0.47 (0.58, 0.39) | 0.58 (0.70, 0.47) | 0.08 (0.23, 0.06) | 0.07 (0.11, 0.05) | 0.10 (0.36, 0.06) | 4.26 (7.94, 3.05) | 3.93 (6.57, 2.72) | 4.58 (11.06, 2.97) |
| Ecuador | 0.51 (0.63, 0.42) | 0.46 (0.56, 0.37) | 0.57 (0.69, 0.46) | 0.18 (0.21, 0.15) | 0.16 (0.19, 0.13) | 0.20 (0.23, 0.16) | 5.80 (6.74, 4.94) | 4.98 (5.89, 4.10) | 6.59 (7.71, 5.51) |
| Egypt | 0.53 (0.65, 0.43) | 0.49 (0.60, 0.39) | 0.59 (0.72, 0.47) | 0.36 (0.50, 0.28) | 0.32 (0.44, 0.25) | 0.46 (0.80, 0.34) | 16.51 (21.87, 12.82) | 17.05 (23.02, 12.78) | 16.54 (25.23, 11.71) |
| El Salvador | 0.44 (0.54, 0.35) | 0.40 (0.49, 0.33) | 0.47 (0.58, 0.38) | 0.12 (0.24, 0.08) | 0.09 (0.14, 0.06) | 0.14 (0.31, 0.09) | 4.18 (6.98, 3.02) | 3.17 (4.92, 2.36) | 5.01 (9.12, 3.42) |
| Equatorial Guinea | 0.75 (0.89, 0.60) | 0.67 (0.80, 0.54) | 0.82 (0.99, 0.67) | 0.11 (0.20, 0.06) | 0.13 (0.23, 0.06) | 0.10 (0.20, 0.05) | 3.83 (6.65, 2.13) | 4.15 (7.36, 2.13) | 3.58 (6.62, 1.71) |
| Eritrea | 0.87 (1.05, 0.71) | 0.79 (0.95, 0.64) | 0.94 (1.12, 0.76) | 0.21 (0.43, 0.09) | 0.26 (0.52, 0.10) | 0.18 (0.53, 0.08) | 8.01 (15.23, 3.80) | 9.31 (17.41, 4.08) | 6.93 (18.90, 3.26) |
| Estonia | 0.38 (0.47, 0.31) | 0.36 (0.44, 0.29) | 0.40 (0.49, 0.32) | 0.04 (0.04, 0.03) | 0.03 (0.04, 0.03) | 0.04 (0.05, 0.03) | 1.12 (1.29, 0.96) | 0.96 (1.14, 0.81) | 1.26 (1.47, 1.08) |
| Eswatini | 0.78 (0.93, 0.63) | 0.71 (0.86, 0.56) | 0.84 (1.01, 0.68) | 0.13 (0.18, 0.09) | 0.19 (0.26, 0.13) | 0.09 (0.14, 0.05) | 5.30 (7.29, 3.57) | 7.04 (9.53, 4.92) | 3.94 (5.93, 2.34) |
| Ethiopia | 1.00 (1.19, 0.82) | 0.89 (1.06, 0.73) | 1.12 (1.33, 0.92) | 0.15 (0.30, 0.05) | 0.17 (0.37, 0.05) | 0.13 (0.43, 0.05) | 5.53 (11.22, 2.30) | 5.90 (11.55, 2.25) | 5.14 (15.93, 2.23) |
| Fiji | 0.68 (0.81, 0.55) | 0.61 (0.73, 0.50) | 0.74 (0.89, 0.59) | 0.15 (0.32, 0.08) | 0.12 (0.26, 0.06) | 0.17 (0.42, 0.09) | 5.17 (9.99, 2.93) | 4.00 (8.70, 2.15) | 6.32 (14.07, 3.36) |
| Finland | 0.41 (0.50, 0.33) | 0.39 (0.48, 0.32) | 0.43 (0.52, 0.35) | 0.06 (0.07, 0.05) | 0.04 (0.04, 0.03) | 0.08 (0.09, 0.07) | 2.13 (2.35, 1.95) | 1.32 (1.48, 1.18) | 2.91 (3.25, 2.66) |
| France | 0.47 (0.57, 0.38) | 0.45 (0.55, 0.36) | 0.50 (0.61, 0.40) | 0.21 (0.23, 0.19) | 0.19 (0.21, 0.17) | 0.22 (0.25, 0.19) | 6.05 (6.55, 5.60) | 5.37 (5.88, 4.94) | 6.68 (7.32, 6.12) |
| Gabon | 0.75 (0.90, 0.61) | 0.68 (0.83, 0.56) | 0.81 (0.99, 0.66) | 0.13 (0.24, 0.07) | 0.15 (0.31, 0.08) | 0.12 (0.24, 0.06) | 4.14 (7.11, 2.32) | 4.67 (9.76, 2.61) | 3.66 (6.62, 1.85) |
| Gambia | 0.68 (0.82, 0.55) | 0.59 (0.73, 0.49) | 0.75 (0.91, 0.62) | 0.19 (0.34, 0.07) | 0.23 (0.49, 0.08) | 0.15 (0.37, 0.06) | 6.52 (11.69, 3.06) | 7.88 (15.48, 3.38) | 5.24 (12.04, 2.55) |
| Georgia | 0.41 (0.50, 0.33) | 0.38 (0.47, 0.31) | 0.43 (0.53, 0.35) | 1.01 (1.27, 0.79) | 1.27 (1.61, 1.00) | 0.83 (1.04, 0.65) | 27.83 (34.82, 22.18) | 35.41 (44.78, 28.07) | 21.29 (26.86, 16.75) |
| Germany | 0.37 (0.45, 0.30) | 0.36 (0.44, 0.29) | 0.39 (0.47, 0.32) | 0.26 (0.28, 0.22) | 0.22 (0.24, 0.20) | 0.29 (0.32, 0.24) | 6.42 (6.91, 5.86) | 5.31 (5.79, 4.83) | 7.47 (8.19, 6.71) |
| Ghana | 0.65 (0.79, 0.53) | 0.56 (0.69, 0.45) | 0.73 (0.88, 0.59) | 0.13 (0.23, 0.06) | 0.16 (0.29, 0.08) | 0.11 (0.23, 0.05) | 4.49 (7.35, 2.65) | 5.21 (8.69, 3.06) | 3.85 (7.71, 2.05) |
| Greece | 0.41 (0.50, 0.34) | 0.39 (0.48, 0.32) | 0.43 (0.52, 0.35) | 0.32 (0.36, 0.29) | 0.22 (0.24, 0.19) | 0.42 (0.47, 0.36) | 8.35 (9.13, 7.67) | 6.05 (6.64, 5.49) | 10.44 (11.48, 9.47) |
| Greenland | 0.33 (0.40, 0.26) | 0.31 (0.38, 0.25) | 0.35 (0.43, 0.28) | 0.19 (0.30, 0.15) | 0.11 (0.17, 0.07) | 0.27 (0.45, 0.19) | 7.06 (10.16, 5.05) | 3.26 (5.11, 2.12) | 11.13 (17.26, 7.63) |
| Grenada | 0.50 (0.61, 0.40) | 0.45 (0.55, 0.36) | 0.55 (0.67, 0.44) | 0.26 (0.29, 0.22) | 0.32 (0.37, 0.28) | 0.23 (0.26, 0.20) | 8.80 (10.03, 7.66) | 10.11 (11.57, 8.75) | 7.84 (9.22, 6.62) |
| Guam | 0.55 (0.67, 0.44) | 0.51 (0.64, 0.41) | 0.59 (0.72, 0.48) | 0.06 (0.12, 0.03) | 0.05 (0.11, 0.02) | 0.07 (0.17, 0.03) | 2.53 (4.91, 1.37) | 2.06 (4.70, 1.11) | 3.02 (7.20, 1.44) |
| Guatemala | 0.53 (0.64, 0.43) | 0.48 (0.58, 0.39) | 0.58 (0.71, 0.47) | 0.06 (0.07, 0.05) | 0.04 (0.05, 0.04) | 0.07 (0.08, 0.06) | 2.36 (2.80, 2.02) | 1.85 (2.26, 1.53) | 2.81 (3.36, 2.40) |
| Guinea | 0.63 (0.76, 0.51) | 0.54 (0.65, 0.44) | 0.71 (0.87, 0.58) | 0.21 (0.41, 0.08) | 0.26 (0.54, 0.08) | 0.16 (0.44, 0.07) | 8.02 (13.76, 3.99) | 9.92 (18.16, 4.42) | 6.04 (14.04, 2.84) |
| Guinea-Bissau | 0.65 (0.78, 0.52) | 0.57 (0.69, 0.46) | 0.71 (0.86, 0.58) | 0.23 (0.42, 0.10) | 0.30 (0.59, 0.11) | 0.18 (0.47, 0.08) | 8.52 (14.99, 4.19) | 10.62 (19.29, 4.70) | 6.63 (16.79, 3.12) |
| Guyana | 0.52 (0.64, 0.42) | 0.47 (0.58, 0.38) | 0.57 (0.70, 0.45) | 0.39 (0.50, 0.30) | 0.22 (0.29, 0.17) | 0.55 (0.71, 0.42) | 16.06 (21.11, 12.29) | 9.55 (12.49, 7.23) | 22.14 (29.19, 16.63) |
| Haiti | 0.54 (0.66, 0.44) | 0.46 (0.57, 0.37) | 0.62 (0.74, 0.50) | 0.49 (0.73, 0.28) | 0.52 (0.73, 0.27) | 0.46 (0.86, 0.22) | 25.17 (42.29, 11.87) | 28.28 (44.43, 12.19) | 21.76 (47.52, 9.43) |
| Honduras | 0.50 (0.61, 0.40) | 0.43 (0.54, 0.35) | 0.56 (0.69, 0.46) | 0.20 (0.32, 0.12) | 0.15 (0.22, 0.10) | 0.23 (0.42, 0.13) | 5.30 (8.02, 3.67) | 4.06 (6.00, 2.83) | 6.40 (11.02, 3.92) |
| Hungary | 0.48 (0.59, 0.39) | 0.48 (0.58, 0.39) | 0.49 (0.60, 0.39) | 0.16 (0.21, 0.13) | 0.14 (0.17, 0.11) | 0.19 (0.24, 0.15) | 4.66 (5.82, 3.75) | 3.70 (4.60, 3.06) | 5.55 (6.99, 4.39) |
| Iceland | 0.37 (0.44, 0.30) | 0.34 (0.41, 0.28) | 0.39 (0.48, 0.32) | 0.13 (0.15, 0.11) | 0.05 (0.06, 0.04) | 0.20 (0.22, 0.17) | 3.79 (4.27, 3.36) | 1.64 (1.84, 1.44) | 5.94 (6.70, 5.25) |
| India | 0.56 (0.68, 0.46) | 0.50 (0.60, 0.40) | 0.63 (0.75, 0.51) | 0.24 (0.39, 0.15) | 0.22 (0.44, 0.13) | 0.25 (0.41, 0.13) | 7.75 (11.36, 5.52) | 7.19 (11.96, 4.97) | 8.31 (11.88, 4.63) |
| Indonesia | 0.62 (0.74, 0.50) | 0.62 (0.74, 0.50) | 0.61 (0.73, 0.49) | 0.12 (0.37, 0.07) | 0.08 (0.18, 0.05) | 0.15 (0.50, 0.08) | 4.61 (10.44, 3.03) | 3.47 (8.08, 2.28) | 5.74 (14.10, 3.50) |
| Iran (Islamic Republic of) | 0.45 (0.55, 0.37) | 0.42 (0.50, 0.33) | 0.49 (0.60, 0.40) | 0.61 (0.70, 0.40) | 0.48 (0.56, 0.35) | 0.75 (0.90, 0.42) | 16.26 (18.66, 12.86) | 14.99 (17.02, 11.67) | 17.60 (21.58, 12.00) |
| Iraq | 0.57 (0.69, 0.46) | 0.52 (0.64, 0.42) | 0.61 (0.75, 0.49) | 0.15 (0.38, 0.08) | 0.10 (0.15, 0.05) | 0.18 (0.59, 0.09) | 5.20 (10.09, 2.84) | 3.95 (5.64, 2.15) | 6.47 (15.38, 3.22) |
| Ireland | 0.18 (0.23, 0.15) | 0.17 (0.21, 0.14) | 0.19 (0.24, 0.15) | 0.11 (0.12, 0.10) | 0.09 (0.10, 0.08) | 0.12 (0.14, 0.11) | 3.02 (3.33, 2.74) | 2.46 (2.77, 2.18) | 3.55 (3.99, 3.16) |
| Israel | 0.64 (0.79, 0.53) | 0.65 (0.80, 0.53) | 0.64 (0.78, 0.52) | 0.27 (0.30, 0.23) | 0.19 (0.22, 0.17) | 0.33 (0.38, 0.28) | 7.18 (7.81, 6.52) | 5.19 (5.77, 4.65) | 9.00 (9.91, 8.02) |
| Italy | 0.42 (0.50, 0.34) | 0.40 (0.48, 0.32) | 0.44 (0.53, 0.36) | 0.09 (0.10, 0.08) | 0.07 (0.08, 0.07) | 0.10 (0.12, 0.09) | 2.78 (2.99, 2.58) | 2.11 (2.31, 1.94) | 3.42 (3.71, 3.14) |
| Jamaica | 0.41 (0.51, 0.33) | 0.36 (0.45, 0.29) | 0.46 (0.56, 0.37) | 0.07 (0.09, 0.05) | 0.04 (0.06, 0.03) | 0.09 (0.12, 0.07) | 2.81 (3.62, 2.16) | 1.80 (2.36, 1.36) | 3.78 (4.85, 2.87) |
| Japan | 0.34 (0.41, 0.27) | 0.33 (0.41, 0.27) | 0.34 (0.42, 0.28) | 0.29 (0.32, 0.25) | 0.24 (0.26, 0.22) | 0.33 (0.36, 0.28) | 10.72 (11.46, 10.03) | 9.04 (9.87, 8.35) | 12.36 (13.40, 11.37) |
| Jordan | 0.48 (0.60, 0.39) | 0.43 (0.53, 0.34) | 0.54 (0.67, 0.44) | 0.06 (0.20, 0.02) | 0.04 (0.05, 0.02) | 0.08 (0.38, 0.03) | 2.45 (6.89, 1.20) | 2.03 (2.87, 1.03) | 2.94 (12.43, 1.26) |
| Kazakhstan | 0.44 (0.55, 0.36) | 0.42 (0.51, 0.33) | 0.47 (0.57, 0.38) | 0.05 (0.06, 0.04) | 0.05 (0.06, 0.04) | 0.05 (0.06, 0.04) | 1.49 (1.74, 1.23) | 1.49 (1.78, 1.21) | 1.50 (1.78, 1.21) |
| Kenya | 0.84 (1.00, 0.68) | 0.74 (0.89, 0.60) | 0.93 (1.11, 0.76) | 0.12 (0.23, 0.05) | 0.13 (0.28, 0.05) | 0.11 (0.27, 0.04) | 4.05 (7.82, 1.93) | 4.16 (8.30, 2.03) | 3.98 (9.72, 1.75) |
| Kiribati | 0.66 (0.80, 0.54) | 0.60 (0.73, 0.48) | 0.71 (0.86, 0.57) | 0.25 (0.57, 0.16) | 0.21 (0.41, 0.13) | 0.28 (0.73, 0.16) | 8.09 (15.83, 4.85) | 6.95 (14.43, 3.88) | 9.01 (21.14, 5.04) |
| Kuwait | 0.43 (0.52, 0.35) | 0.40 (0.49, 0.32) | 0.47 (0.57, 0.38) | 0.14 (0.16, 0.12) | 0.16 (0.19, 0.13) | 0.12 (0.14, 0.10) | 6.51 (7.73, 5.41) | 7.97 (9.79, 6.41) | 4.97 (5.85, 4.24) |
| Kyrgyzstan | 0.38 (0.47, 0.31) | 0.35 (0.43, 0.28) | 0.41 (0.51, 0.34) | 0.05 (0.06, 0.04) | 0.05 (0.06, 0.04) | 0.05 (0.06, 0.04) | 1.76 (2.16, 1.46) | 1.64 (2.02, 1.36) | 1.87 (2.31, 1.52) |
| Lao People's Democratic Republic | 0.69 (0.83, 0.56) | 0.65 (0.79, 0.53) | 0.73 (0.87, 0.59) | 0.15 (0.36, 0.09) | 0.12 (0.29, 0.07) | 0.18 (0.47, 0.08) | 6.65 (13.98, 3.69) | 5.74 (12.87, 3.23) | 7.53 (17.94, 3.40) |
| Latvia | 0.35 (0.43, 0.29) | 0.33 (0.40, 0.26) | 0.37 (0.45, 0.30) | 0.10 (0.12, 0.09) | 0.11 (0.13, 0.09) | 0.10 (0.11, 0.08) | 2.89 (3.30, 2.51) | 2.99 (3.48, 2.51) | 2.87 (3.30, 2.50) |
| Lebanon | 0.47 (0.56, 0.38) | 0.43 (0.52, 0.34) | 0.50 (0.61, 0.41) | 0.37 (0.59, 0.28) | 0.22 (0.33, 0.17) | 0.51 (0.87, 0.37) | 11.26 (14.49, 8.86) | 7.30 (9.78, 5.64) | 14.94 (21.10, 11.16) |
| Lesotho | 0.77 (0.92, 0.62) | 0.70 (0.85, 0.57) | 0.82 (0.98, 0.67) | 0.14 (0.20, 0.10) | 0.20 (0.28, 0.13) | 0.11 (0.16, 0.06) | 5.40 (7.19, 3.74) | 7.16 (9.80, 4.67) | 4.08 (6.00, 2.38) |
| Liberia | 0.73 (0.87, 0.60) | 0.63 (0.76, 0.51) | 0.83 (1.01, 0.68) | 0.19 (0.36, 0.07) | 0.22 (0.48, 0.06) | 0.15 (0.38, 0.06) | 6.94 (12.33, 3.10) | 8.26 (15.97, 3.21) | 5.53 (12.00, 2.70) |
| Libya | 0.54 (0.65, 0.43) | 0.49 (0.59, 0.39) | 0.59 (0.72, 0.48) | 0.37 (0.64, 0.17) | 0.37 (0.62, 0.13) | 0.38 (0.71, 0.16) | 20.43 (36.65, 8.75) | 23.53 (41.89, 7.90) | 17.15 (34.15, 7.87) |
| Lithuania | 0.37 (0.45, 0.30) | 0.34 (0.42, 0.28) | 0.38 (0.47, 0.31) | 0.08 (0.09, 0.07) | 0.09 (0.11, 0.08) | 0.07 (0.08, 0.06) | 2.30 (2.58, 2.04) | 2.56 (2.96, 2.22) | 2.16 (2.48, 1.89) |
| Luxembourg | 0.38 (0.46, 0.31) | 0.36 (0.44, 0.29) | 0.41 (0.49, 0.33) | 0.21 (0.23, 0.18) | 0.13 (0.15, 0.11) | 0.27 (0.30, 0.23) | 5.06 (5.64, 4.54) | 3.17 (3.58, 2.80) | 6.82 (7.65, 6.08) |
| Madagascar | 0.87 (1.03, 0.70) | 0.76 (0.91, 0.61) | 0.97 (1.15, 0.79) | 0.31 (0.61, 0.15) | 0.37 (0.72, 0.16) | 0.26 (0.74, 0.11) | 12.80 (24.47, 6.85) | 14.79 (27.08, 7.53) | 10.85 (30.10, 5.14) |
| Malawi | 0.92 (1.10, 0.75) | 0.82 (0.98, 0.66) | 1.01 (1.22, 0.82) | 0.16 (0.30, 0.07) | 0.22 (0.44, 0.09) | 0.12 (0.33, 0.05) | 6.17 (10.65, 3.08) | 8.00 (14.90, 3.73) | 4.59 (12.93, 2.06) |
| Malaysia | 0.48 (0.59, 0.38) | 0.46 (0.56, 0.37) | 0.50 (0.62, 0.40) | 0.07 (0.26, 0.04) | 0.04 (0.05, 0.03) | 0.10 (0.50, 0.05) | 2.48 (6.63, 1.66) | 1.58 (1.90, 1.13) | 3.44 (11.80, 2.10) |
| Maldives | 0.51 (0.62, 0.41) | 0.47 (0.58, 0.38) | 0.55 (0.68, 0.45) | 0.19 (0.30, 0.15) | 0.20 (0.30, 0.15) | 0.18 (0.34, 0.13) | 7.48 (10.28, 5.98) | 8.26 (12.04, 6.30) | 6.77 (10.46, 4.90) |
| Mali | 0.61 (0.73, 0.49) | 0.52 (0.64, 0.42) | 0.71 (0.84, 0.57) | 0.18 (0.38, 0.06) | 0.19 (0.45, 0.05) | 0.17 (0.52, 0.06) | 6.95 (13.92, 3.08) | 7.28 (14.80, 2.83) | 6.53 (18.02, 2.67) |
| Malta | 0.38 (0.47, 0.31) | 0.36 (0.43, 0.29) | 0.41 (0.50, 0.33) | 0.08 (0.10, 0.07) | 0.04 (0.05, 0.04) | 0.12 (0.13, 0.10) | 2.90 (3.27, 2.55) | 1.77 (2.07, 1.51) | 3.97 (4.49, 3.48) |
| Marshall Islands | 0.61 (0.74, 0.50) | 0.55 (0.67, 0.44) | 0.67 (0.83, 0.54) | 0.23 (0.50, 0.14) | 0.19 (0.38, 0.10) | 0.29 (0.75, 0.16) | 8.04 (15.81, 4.72) | 6.13 (13.18, 3.37) | 10.05 (22.27, 5.54) |
| Mauritania | 0.56 (0.67, 0.45) | 0.47 (0.58, 0.38) | 0.64 (0.78, 0.52) | 0.14 (0.28, 0.06) | 0.15 (0.34, 0.05) | 0.14 (0.31, 0.06) | 4.73 (8.52, 2.40) | 4.86 (9.88, 2.26) | 4.56 (9.44, 2.33) |
| Mauritius | 0.73 (0.88, 0.59) | 0.71 (0.86, 0.58) | 0.75 (0.90, 0.61) | 0.71 (0.77, 0.63) | 0.52 (0.56, 0.46) | 0.88 (0.97, 0.78) | 28.96 (31.57, 25.61) | 20.88 (22.83, 18.57) | 36.90 (40.70, 32.22) |
| Mexico | 0.50 (0.60, 0.41) | 0.46 (0.55, 0.37) | 0.54 (0.65, 0.44) | 0.09 (0.10, 0.08) | 0.06 (0.07, 0.05) | 0.11 (0.12, 0.09) | 3.11 (3.53, 2.78) | 2.38 (2.72, 2.08) | 3.78 (4.31, 3.31) |
| Micronesia (Federated States of) | 0.64 (0.79, 0.52) | 0.59 (0.72, 0.47) | 0.69 (0.85, 0.56) | 0.24 (0.55, 0.15) | 0.18 (0.37, 0.11) | 0.29 (0.75, 0.17) | 7.48 (15.03, 4.69) | 5.64 (11.69, 3.40) | 9.24 (20.81, 5.38) |
| Monaco | 0.41 (0.50, 0.33) | 0.39 (0.47, 0.31) | 0.44 (0.53, 0.35) | 0.15 (0.21, 0.10) | 0.13 (0.17, 0.09) | 0.16 (0.27, 0.10) | 4.46 (6.12, 3.07) | 3.65 (4.86, 2.57) | 5.26 (7.83, 3.35) |
| Mongolia | 0.48 (0.58, 0.38) | 0.44 (0.53, 0.35) | 0.51 (0.62, 0.41) | 1.59 (2.05, 0.91) | 1.94 (2.71, 1.14) | 1.33 (1.92, 0.33) | 43.92 (56.54, 25.60) | 54.14 (75.22, 32.11) | 35.30 (49.97, 7.22) |
| Montenegro | 0.40 (0.49, 0.33) | 0.39 (0.49, 0.32) | 0.41 (0.50, 0.33) | 0.03 (0.20, 0.02) | 0.03 (0.04, 0.02) | 0.03 (0.33, 0.01) | 1.05 (4.82, 0.60) | 0.97 (1.14, 0.64) | 1.14 (7.99, 0.52) |
| Morocco | 0.52 (0.63, 0.42) | 0.47 (0.56, 0.37) | 0.57 (0.70, 0.46) | 0.43 (0.67, 0.15) | 0.37 (0.58, 0.10) | 0.49 (0.86, 0.19) | 13.46 (20.47, 6.51) | 12.41 (18.73, 4.53) | 14.43 (25.92, 7.48) |
| Mozambique | 0.91 (1.08, 0.74) | 0.81 (0.98, 0.67) | 0.99 (1.18, 0.80) | 0.24 (0.46, 0.09) | 0.34 (0.66, 0.13) | 0.17 (0.49, 0.06) | 8.59 (15.15, 3.81) | 11.96 (21.77, 5.15) | 5.69 (15.49, 2.39) |
| Myanmar | 0.60 (0.72, 0.49) | 0.57 (0.68, 0.46) | 0.62 (0.74, 0.51) | 0.15 (0.42, 0.10) | 0.14 (0.32, 0.09) | 0.16 (0.54, 0.09) | 6.76 (13.78, 4.43) | 6.42 (15.21, 4.08) | 7.04 (16.85, 4.15) |
| Namibia | 0.86 (1.02, 0.70) | 0.78 (0.93, 0.63) | 0.92 (1.10, 0.76) | 0.13 (0.19, 0.09) | 0.18 (0.27, 0.13) | 0.10 (0.16, 0.06) | 4.86 (6.76, 3.36) | 6.26 (9.17, 4.42) | 3.75 (5.87, 2.23) |
| Nauru | 0.66 (0.81, 0.53) | 0.61 (0.74, 0.49) | 0.71 (0.87, 0.57) | 0.37 (1.00, 0.24) | 0.25 (0.46, 0.16) | 0.46 (1.58, 0.27) | 10.30 (22.74, 6.33) | 7.77 (16.33, 4.60) | 12.55 (32.59, 7.08) |
| Nepal | 0.57 (0.69, 0.46) | 0.50 (0.61, 0.40) | 0.63 (0.76, 0.52) | 0.31 (0.58, 0.15) | 0.26 (0.59, 0.11) | 0.35 (0.64, 0.14) | 9.42 (15.02, 5.15) | 8.36 (15.35, 3.98) | 10.25 (17.09, 4.69) |
| Netherlands | 0.51 (0.62, 0.42) | 0.47 (0.57, 0.38) | 0.56 (0.68, 0.45) | 0.14 (0.15, 0.12) | 0.10 (0.12, 0.09) | 0.17 (0.19, 0.15) | 3.91 (4.26, 3.61) | 2.78 (3.07, 2.54) | 5.00 (5.51, 4.57) |
| New Zealand | 0.42 (0.51, 0.34) | 0.39 (0.49, 0.32) | 0.44 (0.53, 0.36) | 0.10 (0.11, 0.09) | 0.06 (0.06, 0.05) | 0.14 (0.16, 0.13) | 3.55 (3.89, 3.26) | 1.91 (2.08, 1.73) | 5.18 (5.76, 4.69) |
| Nicaragua | 0.51 (0.62, 0.41) | 0.46 (0.56, 0.37) | 0.56 (0.67, 0.45) | 0.05 (0.19, 0.03) | 0.03 (0.05, 0.02) | 0.06 (0.28, 0.03) | 1.76 (5.35, 1.18) | 1.26 (1.88, 0.87) | 2.20 (8.43, 1.35) |
| Niger | 0.59 (0.71, 0.47) | 0.51 (0.61, 0.41) | 0.67 (0.81, 0.54) | 0.23 (0.52, 0.05) | 0.27 (0.72, 0.04) | 0.19 (0.61, 0.06) | 7.69 (15.66, 2.46) | 8.82 (21.51, 2.20) | 6.56 (18.72, 2.37) |
| Nigeria | 0.63 (0.77, 0.51) | 0.53 (0.64, 0.43) | 0.72 (0.87, 0.59) | 0.14 (0.23, 0.07) | 0.17 (0.35, 0.08) | 0.11 (0.22, 0.05) | 6.04 (8.84, 4.07) | 7.71 (12.55, 4.71) | 4.37 (7.68, 2.66) |
| Niue | 0.57 (0.69, 0.46) | 0.53 (0.64, 0.42) | 0.61 (0.75, 0.49) | 0.23 (0.52, 0.14) | 0.16 (0.37, 0.09) | 0.30 (0.79, 0.17) | 11.14 (23.27, 7.04) | 7.26 (16.44, 4.33) | 15.14 (35.34, 8.80) |
| North Macedonia | 0.48 (0.58, 0.39) | 0.46 (0.56, 0.37) | 0.49 (0.60, 0.40) | 0.12 (0.23, 0.07) | 0.07 (0.11, 0.05) | 0.16 (0.35, 0.07) | 3.18 (5.83, 1.68) | 1.91 (2.98, 1.19) | 4.38 (8.86, 1.96) |
| Northern Mariana Islands | 0.54 (0.66, 0.43) | 0.49 (0.61, 0.40) | 0.58 (0.72, 0.47) | 0.11 (0.28, 0.07) | 0.08 (0.17, 0.04) | 0.14 (0.42, 0.07) | 3.36 (6.99, 2.06) | 2.30 (4.91, 1.38) | 4.33 (10.08, 2.35) |
| Norway | 0.45 (0.54, 0.36) | 0.42 (0.51, 0.34) | 0.47 (0.57, 0.38) | 0.05 (0.05, 0.05) | 0.04 (0.04, 0.03) | 0.06 (0.07, 0.06) | 1.92 (2.11, 1.77) | 1.28 (1.44, 1.16) | 2.58 (2.81, 2.36) |
| Oman | 0.54 (0.66, 0.43) | 0.50 (0.61, 0.40) | 0.59 (0.72, 0.47) | 0.11 (0.24, 0.04) | 0.09 (0.12, 0.03) | 0.15 (0.38, 0.05) | 3.90 (7.22, 1.49) | 3.06 (4.41, 1.13) | 5.09 (12.77, 1.75) |
| Pakistan | 0.59 (0.71, 0.48) | 0.52 (0.63, 0.42) | 0.66 (0.79, 0.54) | 0.32 (0.56, 0.18) | 0.28 (0.61, 0.15) | 0.37 (0.69, 0.15) | 11.96 (18.26, 7.86) | 11.07 (18.24, 7.76) | 12.90 (20.67, 5.55) |
| Palau | 0.59 (0.71, 0.47) | 0.54 (0.66, 0.44) | 0.63 (0.77, 0.51) | 0.13 (0.30, 0.06) | 0.08 (0.19, 0.04) | 0.19 (0.49, 0.08) | 4.37 (9.17, 2.21) | 2.95 (6.62, 1.48) | 6.10 (13.59, 2.86) |
| Palestine | 0.50 (0.61, 0.40) | 0.46 (0.56, 0.37) | 0.54 (0.66, 0.44) | 0.13 (0.41, 0.05) | 0.11 (0.15, 0.04) | 0.16 (0.64, 0.06) | 4.66 (11.88, 1.98) | 4.02 (5.72, 1.67) | 5.27 (19.52, 2.04) |
| Panama | 0.44 (0.54, 0.36) | 0.40 (0.49, 0.32) | 0.49 (0.60, 0.39) | 0.06 (0.07, 0.05) | 0.03 (0.03, 0.02) | 0.08 (0.10, 0.07) | 2.08 (2.46, 1.73) | 1.07 (1.29, 0.87) | 3.08 (3.64, 2.56) |
| Papua New Guinea | 0.60 (0.72, 0.49) | 0.54 (0.65, 0.44) | 0.67 (0.80, 0.55) | 0.27 (0.55, 0.17) | 0.23 (0.56, 0.14) | 0.31 (0.72, 0.17) | 11.31 (19.45, 7.43) | 8.93 (18.25, 5.88) | 13.86 (26.33, 7.39) |
| Paraguay | 0.43 (0.52, 0.35) | 0.39 (0.47, 0.31) | 0.46 (0.56, 0.38) | 0.07 (0.22, 0.04) | 0.04 (0.06, 0.03) | 0.10 (0.37, 0.05) | 2.42 (6.14, 1.58) | 1.49 (2.03, 1.00) | 3.31 (10.02, 1.98) |
| Peru | 0.54 (0.66, 0.44) | 0.48 (0.59, 0.39) | 0.61 (0.73, 0.50) | 0.13 (0.18, 0.09) | 0.10 (0.14, 0.07) | 0.15 (0.24, 0.10) | 4.65 (6.29, 3.45) | 3.60 (4.87, 2.54) | 5.68 (8.07, 3.95) |
| Philippines | 0.64 (0.77, 0.52) | 0.67 (0.80, 0.54) | 0.62 (0.74, 0.50) | 0.08 (0.24, 0.05) | 0.06 (0.07, 0.04) | 0.09 (0.38, 0.05) | 3.28 (7.50, 2.37) | 2.53 (3.09, 1.86) | 4.03 (11.44, 2.60) |
| Poland | 0.48 (0.58, 0.39) | 0.50 (0.60, 0.40) | 0.45 (0.55, 0.37) | 0.12 (0.13, 0.11) | 0.12 (0.13, 0.11) | 0.12 (0.14, 0.11) | 3.95 (4.29, 3.58) | 3.55 (3.93, 3.20) | 4.40 (4.89, 3.91) |
| Portugal | 0.28 (0.34, 0.23) | 0.26 (0.32, 0.21) | 0.31 (0.37, 0.25) | 0.22 (0.24, 0.19) | 0.15 (0.17, 0.13) | 0.27 (0.30, 0.23) | 5.82 (6.28, 5.35) | 3.86 (4.25, 3.52) | 7.54 (8.23, 6.85) |
| Puerto Rico | 0.43 (0.52, 0.34) | 0.40 (0.48, 0.32) | 0.45 (0.56, 0.36) | 0.10 (0.12, 0.08) | 0.09 (0.11, 0.07) | 0.11 (0.13, 0.09) | 3.98 (4.67, 3.33) | 3.66 (4.33, 3.05) | 4.23 (5.03, 3.53) |
| Qatar | 0.45 (0.55, 0.36) | 0.42 (0.52, 0.33) | 0.51 (0.63, 0.41) | 0.13 (0.19, 0.07) | 0.12 (0.18, 0.06) | 0.15 (0.28, 0.07) | 3.75 (5.57, 1.96) | 3.55 (5.18, 1.88) | 4.31 (8.79, 2.20) |
| Republic of Korea | 0.30 (0.37, 0.24) | 0.30 (0.37, 0.24) | 0.30 (0.37, 0.24) | 0.06 (0.17, 0.03) | 0.03 (0.05, 0.02) | 0.07 (0.26, 0.04) | 2.40 (4.75, 1.67) | 1.57 (2.36, 1.17) | 3.21 (7.48, 2.09) |
| Republic of Moldova | 0.43 (0.52, 0.35) | 0.39 (0.48, 0.32) | 0.46 (0.56, 0.37) | 0.01 (0.01, 0.01) | 0.00 (0.01, 0.00) | 0.01 (0.01, 0.01) | 0.54 (0.68, 0.44) | 0.36 (0.47, 0.29) | 0.72 (0.90, 0.58) |
| Romania | 0.45 (0.55, 0.36) | 0.44 (0.54, 0.35) | 0.45 (0.54, 0.36) | 0.49 (0.55, 0.42) | 0.44 (0.50, 0.38) | 0.54 (0.61, 0.46) | 13.92 (15.83, 12.01) | 11.66 (13.33, 10.11) | 16.21 (18.59, 13.90) |
| Russian Federation | 0.42 (0.50, 0.34) | 0.40 (0.48, 0.32) | 0.43 (0.52, 0.35) | 0.10 (0.11, 0.10) | 0.14 (0.15, 0.12) | 0.09 (0.09, 0.08) | 3.62 (3.89, 3.38) | 4.24 (4.60, 3.87) | 3.26 (3.58, 2.93) |
| Rwanda | 0.94 (1.12, 0.77) | 0.83 (1.01, 0.67) | 1.03 (1.23, 0.84) | 0.17 (0.37, 0.07) | 0.21 (0.47, 0.07) | 0.15 (0.46, 0.06) | 6.17 (13.12, 2.87) | 6.89 (14.51, 2.92) | 5.65 (17.48, 2.51) |
| Saint Kitts and Nevis | 0.52 (0.63, 0.42) | 0.47 (0.59, 0.38) | 0.57 (0.69, 0.46) | 0.07 (0.09, 0.06) | 0.01 (0.01, 0.00) | 0.12 (0.15, 0.10) | 2.32 (2.81, 1.90) | 0.31 (0.39, 0.25) | 4.17 (5.12, 3.37) |
| Saint Lucia | 0.46 (0.56, 0.37) | 0.41 (0.50, 0.33) | 0.50 (0.61, 0.40) | 0.24 (0.29, 0.20) | 0.26 (0.32, 0.21) | 0.23 (0.27, 0.19) | 8.36 (10.22, 6.78) | 8.70 (10.78, 6.95) | 8.06 (9.81, 6.58) |
| Saint Vincent and the Grenadines | 0.48 (0.58, 0.39) | 0.43 (0.53, 0.35) | 0.53 (0.64, 0.43) | 0.06 (0.07, 0.05) | 0.10 (0.11, 0.08) | 0.03 (0.03, 0.02) | 2.45 (2.88, 2.08) | 3.57 (4.26, 2.98) | 1.30 (1.53, 1.11) |
| Samoa | 0.53 (0.65, 0.43) | 0.48 (0.58, 0.39) | 0.58 (0.73, 0.47) | 0.20 (0.47, 0.13) | 0.15 (0.30, 0.11) | 0.25 (0.70, 0.15) | 6.56 (12.94, 4.40) | 4.74 (9.54, 3.34) | 8.42 (19.96, 5.21) |
| San Marino | 0.40 (0.49, 0.32) | 0.37 (0.46, 0.30) | 0.43 (0.52, 0.34) | 0.05 (0.12, 0.03) | 0.04 (0.06, 0.02) | 0.06 (0.20, 0.03) | 1.61 (3.13, 1.07) | 1.22 (1.89, 0.83) | 1.97 (4.91, 1.23) |
| Sao Tome and Principe | 0.53 (0.65, 0.43) | 0.46 (0.56, 0.37) | 0.60 (0.73, 0.48) | 0.13 (0.24, 0.05) | 0.13 (0.26, 0.05) | 0.12 (0.30, 0.04) | 4.36 (8.40, 1.85) | 4.47 (8.84, 1.85) | 4.25 (10.30, 1.72) |
| Saudi Arabia | 0.47 (0.58, 0.38) | 0.43 (0.54, 0.35) | 0.53 (0.64, 0.42) | 0.08 (0.20, 0.04) | 0.04 (0.05, 0.02) | 0.14 (0.43, 0.06) | 2.62 (5.39, 1.45) | 1.46 (1.96, 0.89) | 4.33 (10.86, 2.06) |
| Senegal | 0.69 (0.83, 0.56) | 0.61 (0.73, 0.49) | 0.78 (0.93, 0.63) | 0.18 (0.33, 0.06) | 0.22 (0.49, 0.07) | 0.14 (0.37, 0.05) | 6.40 (11.21, 2.74) | 7.61 (15.10, 2.98) | 5.24 (12.66, 2.33) |
| Serbia | 0.45 (0.54, 0.36) | 0.44 (0.53, 0.36) | 0.45 (0.55, 0.36) | 0.09 (0.19, 0.06) | 0.07 (0.10, 0.05) | 0.11 (0.27, 0.06) | 2.43 (4.62, 1.58) | 1.75 (2.33, 1.25) | 3.10 (7.15, 1.79) |
| Seychelles | 0.50 (0.61, 0.41) | 0.49 (0.61, 0.40) | 0.51 (0.62, 0.41) | 0.08 (0.25, 0.04) | 0.05 (0.11, 0.02) | 0.10 (0.40, 0.05) | 2.86 (6.44, 1.75) | 1.69 (3.97, 1.02) | 4.16 (10.17, 2.30) |
| Sierra Leone | 0.62 (0.75, 0.51) | 0.54 (0.66, 0.44) | 0.71 (0.86, 0.57) | 0.20 (0.34, 0.08) | 0.25 (0.48, 0.10) | 0.14 (0.37, 0.06) | 8.24 (13.62, 4.47) | 10.74 (18.05, 5.50) | 5.67 (12.73, 2.55) |
| Singapore | 0.35 (0.43, 0.28) | 0.35 (0.43, 0.28) | 0.35 (0.43, 0.28) | 0.09 (0.10, 0.08) | 0.05 (0.05, 0.04) | 0.13 (0.14, 0.11) | 3.83 (4.27, 3.44) | 2.17 (2.49, 1.88) | 5.54 (6.21, 4.93) |
| Slovakia | 0.49 (0.59, 0.40) | 0.49 (0.59, 0.39) | 0.49 (0.59, 0.40) | 0.06 (0.13, 0.04) | 0.05 (0.07, 0.03) | 0.08 (0.18, 0.04) | 2.04 (3.61, 1.32) | 1.43 (1.99, 1.00) | 2.61 (4.89, 1.57) |
| Slovenia | 0.44 (0.54, 0.36) | 0.43 (0.53, 0.35) | 0.44 (0.55, 0.36) | 0.04 (0.04, 0.03) | 0.04 (0.04, 0.03) | 0.04 (0.05, 0.03) | 1.03 (1.21, 0.88) | 0.94 (1.10, 0.79) | 1.14 (1.36, 0.94) |
| Solomon Islands | 0.64 (0.78, 0.52) | 0.58 (0.71, 0.46) | 0.70 (0.84, 0.57) | 0.22 (0.51, 0.13) | 0.20 (0.48, 0.12) | 0.24 (0.65, 0.13) | 6.31 (11.93, 4.18) | 5.80 (12.07, 3.89) | 6.84 (15.21, 3.73) |
| Somalia | 0.88 (1.06, 0.72) | 0.79 (0.95, 0.64) | 0.96 (1.15, 0.79) | 0.27 (0.58, 0.06) | 0.38 (0.97, 0.06) | 0.18 (0.67, 0.05) | 10.58 (22.97, 2.79) | 14.36 (36.16, 2.88) | 7.28 (24.30, 2.14) |
| South Africa | 0.74 (0.88, 0.60) | 0.67 (0.82, 0.55) | 0.79 (0.94, 0.64) | 0.09 (0.11, 0.07) | 0.11 (0.14, 0.09) | 0.08 (0.11, 0.05) | 3.58 (4.23, 2.77) | 4.13 (4.97, 3.37) | 3.12 (3.97, 2.13) |
| South Sudan | 0.88 (1.06, 0.71) | 0.79 (0.95, 0.64) | 0.97 (1.17, 0.79) | 0.24 (0.44, 0.09) | 0.31 (0.67, 0.10) | 0.16 (0.51, 0.06) | 10.34 (18.60, 5.26) | 13.26 (24.80, 5.97) | 7.25 (19.09, 2.88) |
| Spain | 0.37 (0.45, 0.30) | 0.36 (0.44, 0.28) | 0.38 (0.46, 0.31) | 0.22 (0.24, 0.19) | 0.15 (0.16, 0.13) | 0.28 (0.31, 0.24) | 6.00 (6.41, 5.52) | 3.96 (4.37, 3.58) | 7.85 (8.53, 7.10) |
| Sri Lanka | 0.59 (0.71, 0.47) | 0.58 (0.71, 0.46) | 0.59 (0.72, 0.48) | 0.42 (0.60, 0.27) | 0.35 (0.49, 0.22) | 0.47 (0.74, 0.27) | 15.14 (21.88, 9.48) | 12.66 (17.58, 8.23) | 17.39 (27.22, 8.00) |
| Sudan | 0.54 (0.65, 0.44) | 0.49 (0.59, 0.40) | 0.59 (0.72, 0.48) | 0.42 (0.61, 0.18) | 0.40 (0.60, 0.14) | 0.44 (0.77, 0.17) | 17.35 (25.58, 8.60) | 18.80 (28.18, 7.32) | 15.91 (29.04, 6.82) |
| Suriname | 0.53 (0.64, 0.43) | 0.47 (0.57, 0.38) | 0.58 (0.71, 0.47) | 0.32 (0.47, 0.24) | 0.26 (0.39, 0.19) | 0.38 (0.60, 0.27) | 14.26 (19.62, 10.62) | 12.12 (18.47, 8.15) | 16.17 (24.39, 9.47) |
| Sweden | 0.78 (0.94, 0.64) | 0.68 (0.82, 0.55) | 0.89 (1.08, 0.74) | 0.12 (0.14, 0.11) | 0.08 (0.09, 0.07) | 0.16 (0.18, 0.13) | 4.14 (4.63, 3.73) | 2.78 (3.13, 2.41) | 5.50 (6.30, 4.82) |
| Switzerland | 0.75 (0.90, 0.62) | 0.68 (0.82, 0.56) | 0.83 (1.00, 0.68) | 0.19 (0.21, 0.16) | 0.15 (0.17, 0.13) | 0.21 (0.24, 0.17) | 5.12 (5.63, 4.64) | 4.13 (4.64, 3.68) | 6.07 (6.76, 5.45) |
| Syrian Arab Republic | 0.61 (0.74, 0.50) | 0.55 (0.68, 0.45) | 0.66 (0.81, 0.54) | 0.06 (0.29, 0.03) | 0.04 (0.05, 0.02) | 0.08 (0.61, 0.03) | 2.32 (11.57, 1.05) | 1.71 (2.48, 0.92) | 2.90 (21.14, 1.13) |
| Taiwan (Province of China) | 0.45 (0.55, 0.36) | 0.43 (0.54, 0.35) | 0.47 (0.57, 0.38) | 0.18 (0.20, 0.16) | 0.14 (0.16, 0.13) | 0.22 (0.24, 0.18) | 4.19 (4.54, 3.77) | 3.15 (3.48, 2.83) | 5.14 (5.65, 4.57) |
| Tajikistan | 0.44 (0.53, 0.36) | 0.39 (0.48, 0.32) | 0.48 (0.59, 0.39) | 0.81 (1.09, 0.53) | 0.84 (1.23, 0.52) | 0.78 (1.15, 0.29) | 27.43 (37.43, 17.75) | 27.95 (41.17, 16.72) | 26.96 (40.38, 9.44) |
| Thailand | 0.53 (0.63, 0.42) | 0.52 (0.62, 0.42) | 0.54 (0.65, 0.43) | 0.07 (0.28, 0.04) | 0.05 (0.06, 0.03) | 0.09 (0.44, 0.05) | 3.09 (7.50, 2.13) | 2.42 (3.17, 1.71) | 3.69 (11.45, 2.24) |
| Timor-Leste | 0.57 (0.69, 0.46) | 0.53 (0.65, 0.43) | 0.62 (0.74, 0.50) | 0.15 (0.43, 0.08) | 0.12 (0.26, 0.07) | 0.18 (0.60, 0.08) | 6.29 (13.06, 3.77) | 5.53 (11.52, 3.23) | 7.02 (18.18, 3.54) |
| Togo | 0.63 (0.76, 0.51) | 0.55 (0.67, 0.44) | 0.70 (0.85, 0.57) | 0.18 (0.31, 0.07) | 0.23 (0.46, 0.09) | 0.14 (0.33, 0.06) | 6.36 (10.38, 3.03) | 7.93 (14.14, 3.54) | 5.04 (10.71, 2.42) |
| Tokelau | 0.57 (0.70, 0.46) | 0.50 (0.62, 0.40) | 0.64 (0.78, 0.52) | 0.29 (0.73, 0.18) | 0.18 (0.36, 0.12) | 0.40 (1.18, 0.23) | 13.26 (31.56, 8.10) | 7.97 (17.89, 5.22) | 18.80 (48.79, 10.40) |
| Tonga | 0.54 (0.65, 0.43) | 0.49 (0.59, 0.40) | 0.59 (0.72, 0.46) | 0.14 (0.34, 0.09) | 0.11 (0.22, 0.08) | 0.16 (0.47, 0.09) | 4.46 (9.33, 2.97) | 3.66 (7.06, 2.50) | 5.17 (12.70, 3.18) |
| Trinidad and Tobago | 0.46 (0.56, 0.37) | 0.42 (0.50, 0.33) | 0.51 (0.61, 0.41) | 0.18 (0.24, 0.14) | 0.11 (0.14, 0.08) | 0.25 (0.33, 0.20) | 7.72 (9.91, 5.91) | 4.79 (6.20, 3.64) | 10.64 (13.98, 7.98) |
| Tunisia | 0.46 (0.56, 0.37) | 0.43 (0.52, 0.34) | 0.50 (0.61, 0.40) | 0.36 (0.60, 0.11) | 0.28 (0.45, 0.08) | 0.41 (0.81, 0.13) | 9.23 (14.80, 3.88) | 8.01 (11.72, 2.98) | 10.26 (19.41, 4.65) |
| Turkey | 0.52 (0.63, 0.42) | 0.48 (0.59, 0.39) | 0.56 (0.68, 0.45) | 0.50 (0.69, 0.39) | 0.40 (0.51, 0.29) | 0.58 (0.87, 0.40) | 16.56 (20.56, 12.93) | 14.49 (18.24, 10.60) | 18.39 (24.99, 11.88) |
| Turkmenistan | 0.46 (0.56, 0.38) | 0.42 (0.51, 0.34) | 0.50 (0.61, 0.41) | 0.23 (0.31, 0.17) | 0.26 (0.35, 0.19) | 0.21 (0.28, 0.15) | 7.85 (10.27, 5.96) | 8.70 (11.43, 6.60) | 7.02 (9.75, 5.05) |
| Tuvalu | 0.63 (0.77, 0.51) | 0.57 (0.70, 0.46) | 0.70 (0.84, 0.56) | 0.23 (0.52, 0.15) | 0.17 (0.35, 0.11) | 0.27 (0.72, 0.16) | 7.30 (14.38, 4.76) | 5.69 (12.43, 3.52) | 8.93 (20.09, 5.43) |
| Uganda | 1.00 (1.20, 0.82) | 0.89 (1.08, 0.73) | 1.10 (1.32, 0.90) | 0.15 (0.28, 0.07) | 0.20 (0.37, 0.08) | 0.11 (0.34, 0.05) | 5.98 (10.36, 3.20) | 7.48 (12.76, 3.78) | 4.70 (12.41, 2.28) |
| Ukraine | 0.47 (0.58, 0.38) | 0.46 (0.56, 0.37) | 0.48 (0.59, 0.39) | 0.07 (0.09, 0.05) | 0.09 (0.12, 0.06) | 0.06 (0.08, 0.04) | 3.05 (3.83, 2.37) | 3.36 (4.44, 2.37) | 2.87 (3.99, 1.96) |
| United Arab Emirates | 0.48 (0.58, 0.38) | 0.45 (0.56, 0.36) | 0.54 (0.67, 0.43) | 0.38 (0.53, 0.20) | 0.11 (0.15, 0.08) | 1.51 (2.27, 0.69) | 10.31 (13.04, 5.63) | 4.18 (5.73, 3.09) | 30.44 (42.55, 12.44) |
| United Kingdom | 0.29 (0.35, 0.23) | 0.28 (0.34, 0.22) | 0.30 (0.36, 0.24) | 0.10 (0.11, 0.10) | 0.08 (0.08, 0.08) | 0.12 (0.13, 0.11) | 3.73 (3.92, 3.54) | 2.98 (3.17, 2.79) | 4.43 (4.67, 4.21) |
| United Republic of Tanzania | 0.81 (0.98, 0.66) | 0.72 (0.86, 0.58) | 0.90 (1.10, 0.74) | 0.16 (0.31, 0.07) | 0.19 (0.37, 0.08) | 0.14 (0.38, 0.06) | 6.27 (11.36, 3.28) | 7.18 (12.63, 3.48) | 5.40 (13.22, 2.66) |
| United States of America | 0.31 (0.37, 0.25) | 0.29 (0.36, 0.23) | 0.32 (0.39, 0.26) | 0.31 (0.33, 0.27) | 0.23 (0.25, 0.21) | 0.37 (0.40, 0.32) | 8.08 (8.60, 7.49) | 6.23 (6.61, 5.83) | 9.71 (10.35, 8.95) |
| United States Virgin Islands | 0.45 (0.55, 0.36) | 0.42 (0.51, 0.33) | 0.48 (0.58, 0.39) | 0.16 (0.26, 0.11) | 0.19 (0.25, 0.12) | 0.14 (0.25, 0.08) | 6.40 (8.82, 4.53) | 7.50 (9.75, 5.01) | 5.35 (8.56, 3.14) |
| Uruguay | 0.31 (0.37, 0.25) | 0.30 (0.36, 0.24) | 0.32 (0.39, 0.25) | 0.16 (0.17, 0.14) | 0.08 (0.08, 0.07) | 0.22 (0.24, 0.20) | 5.44 (5.99, 4.97) | 2.69 (2.98, 2.42) | 7.92 (8.77, 7.15) |
| Uzbekistan | 0.47 (0.57, 0.38) | 0.42 (0.52, 0.34) | 0.51 (0.62, 0.42) | 0.37 (0.46, 0.30) | 0.40 (0.49, 0.32) | 0.36 (0.45, 0.28) | 12.20 (14.82, 9.83) | 12.75 (15.46, 10.26) | 11.76 (14.42, 9.46) |
| Vanuatu | 0.58 (0.70, 0.47) | 0.53 (0.65, 0.43) | 0.62 (0.77, 0.50) | 0.22 (0.52, 0.14) | 0.19 (0.36, 0.12) | 0.25 (0.75, 0.13) | 7.80 (15.18, 5.12) | 6.55 (12.97, 4.32) | 9.02 (21.56, 5.08) |
| Venezuela (Bolivarian Republic of) | 0.51 (0.62, 0.42) | 0.47 (0.57, 0.38) | 0.55 (0.66, 0.44) | 0.04 (0.06, 0.03) | 0.04 (0.05, 0.03) | 0.04 (0.06, 0.03) | 1.83 (2.27, 1.46) | 1.73 (2.17, 1.33) | 1.91 (2.40, 1.50) |
| Viet Nam | 0.48 (0.60, 0.39) | 0.48 (0.59, 0.39) | 0.49 (0.60, 0.39) | 0.12 (0.40, 0.06) | 0.09 (0.19, 0.05) | 0.13 (0.58, 0.05) | 3.80 (9.56, 2.13) | 3.04 (6.43, 1.96) | 4.48 (13.26, 2.09) |
| Yemen | 0.66 (0.79, 0.54) | 0.59 (0.72, 0.47) | 0.72 (0.88, 0.59) | 0.55 (0.90, 0.21) | 0.54 (0.87, 0.16) | 0.57 (1.10, 0.20) | 19.30 (28.92, 9.07) | 19.91 (30.35, 7.10) | 18.63 (32.80, 7.14) |
| Zambia | 1.06 (1.28, 0.88) | 0.95 (1.14, 0.78) | 1.17 (1.42, 0.96) | 0.24 (0.49, 0.08) | 0.27 (0.57, 0.09) | 0.22 (0.54, 0.08) | 8.64 (17.19, 3.22) | 8.86 (17.85, 3.08) | 8.46 (19.85, 3.16) |
| Zimbabwe | 0.77 (0.93, 0.62) | 0.68 (0.84, 0.55) | 0.84 (1.02, 0.68) | 0.18 (0.26, 0.12) | 0.26 (0.39, 0.16) | 0.13 (0.21, 0.08) | 7.16 (10.44, 4.65) | 9.39 (15.18, 5.79) | 5.42 (9.03, 3.02) |

ASIR, age-standardised incidence rate; ASMR, age-standardised mortality rate; ASDR, age-standardised DALY rate; UI, uncertainty interval; PAH, pulmonary arterial hypertension.
